# Supplementary material
Source: MDPI journal article supplement (https://www.mdpi.com/2079-9276/13/5/62)
Supplement: s1 [file s1]

## Supplementary Material

**Figure S1.** Characterization of the forest types (Level 1, FT-1) at each forest region (TDF+PAT = Tierra del Fuego and Continental forests along the Andes Mountains, ESP = Espinal forests, MON = Monte forests, PCH = Parque Chaqueño forests, YUN = Yunga rainforests, AF = Atlantic forests) according to annual mean temperature (AMT, °C) and annual precipitation (AP, mm.yr<sup>-1</sup>). Red dots indicated means and bars showed the standard deviation for both axes. Acronyms are presented in Annex 4.

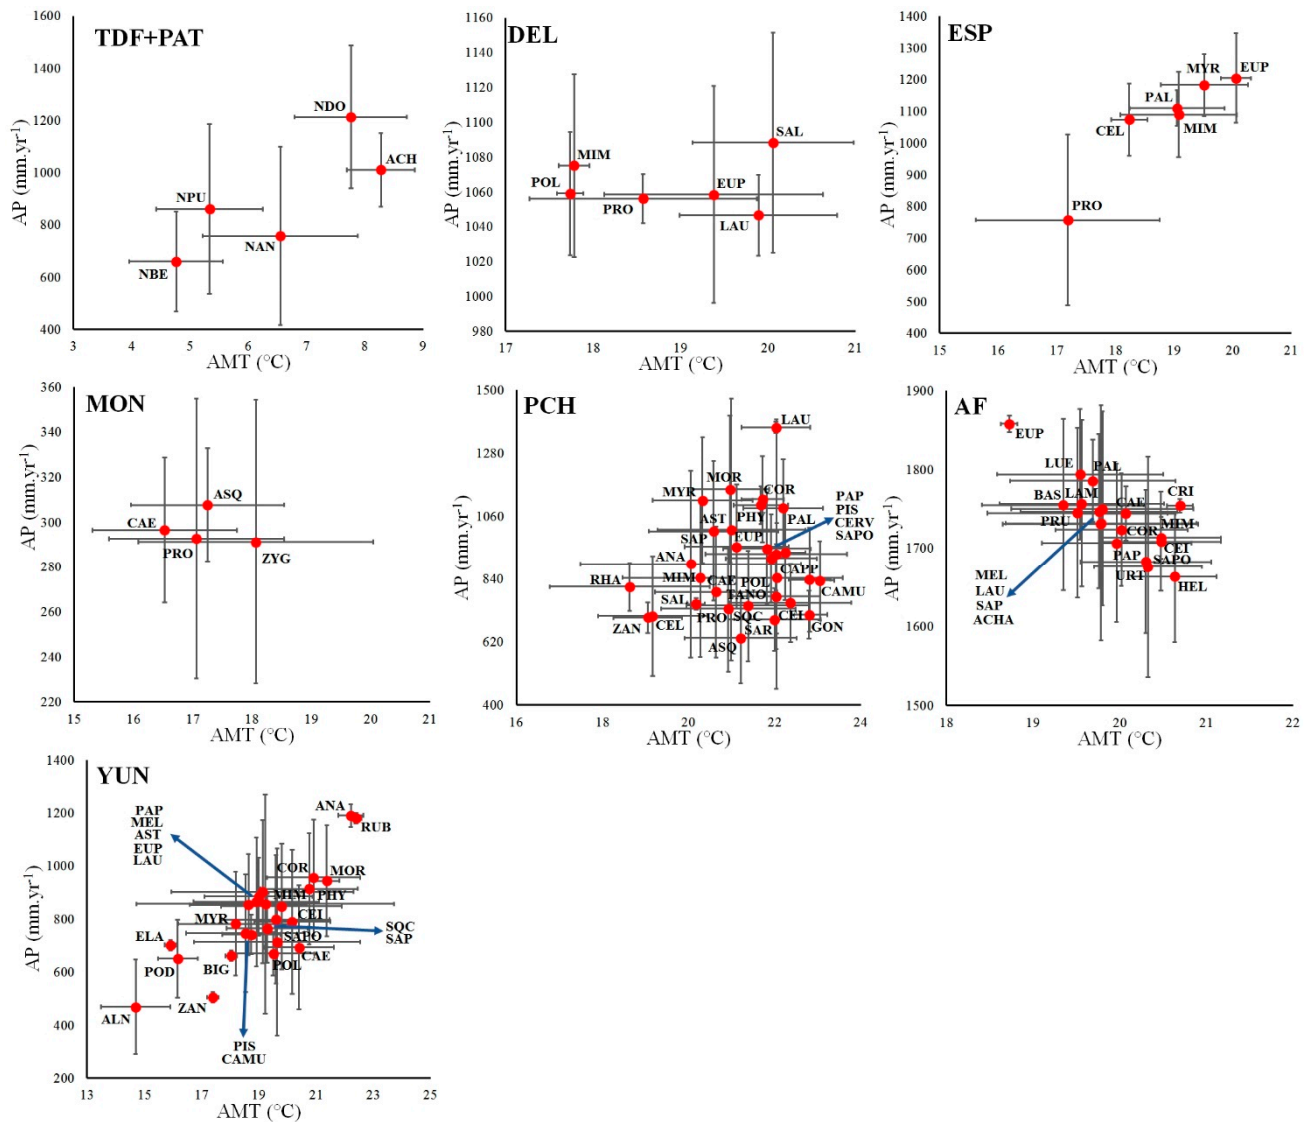

**Table S1.** Taxonomy of the tree forest species identified in the plots of the Second National Forest Inventory.

| <b>Genus</b>           | <b>Species</b>          | <b>Family</b>   | <b>Division</b> |
|------------------------|-------------------------|-----------------|-----------------|
| <i>Acanthosyris</i>    | <i>falcata</i>          | Cervantesiaceae | Angiosperm      |
| <i>Acanthosyris</i>    | <i>spinescens</i>       | Cervantesiaceae | Angiosperm      |
| <i>Achatocarpus</i>    | <i>praecox</i>          | Achatocarpaceae | Angiosperm      |
| <i>Acrocomia</i>       | <i>aculeata</i>         | Arecaceae       | Angiosperm      |
| <i>Actinostemon</i>    | <i>concolor</i>         | Euphorbiaceae   | Angiosperm      |
| <i>Agonandra</i>       | <i>excelsa</i>          | Opiliaceae      | Angiosperm      |
| <i>Aiouea</i>          | <i>amoena</i>           | Lauraceae       | Angiosperm      |
| <i>Albizia</i>         | <i>inundata</i>         | Fabaceae        | Angiosperm      |
| <i>Albizia</i>         | <i>niopoides</i>        | Fabaceae        | Angiosperm      |
| <i>Alchornea</i>       | <i>glandulosa</i>       | Euphorbiaceae   | Angiosperm      |
| <i>Alchornea</i>       | <i>triplinervia</i>     | Euphorbiaceae   | Angiosperm      |
| <i>Allenrolfea</i>     | <i>vaginata</i>         | Chenopodiaceae  | Angiosperm      |
| <i>Allophylus</i>      | <i>edulis</i>           | Sapindaceae     | Angiosperm      |
| <i>Alnus</i>           | <i>acuminata</i>        | Betulaceae      | Angiosperm      |
| <i>Aloysia</i>         | <i>gratissima</i>       | Verbenaceae     | Angiosperm      |
| <i>Aloysia</i>         | <i>virgata</i>          | Verbenaceae     | Angiosperm      |
| <i>Anadenanthera</i>   | <i>colubrina</i>        | Fabaceae        | Angiosperm      |
| <i>Anarthrophyllum</i> | <i>capitatum</i>        | Fabaceae        | Angiosperm      |
| <i>Anisocapparis</i>   | <i>speciosa</i>         | Capparaceae     | Angiosperm      |
| <i>Annona</i>          | <i>emarginata</i>       | Annonaceae      | Angiosperm      |
| <i>Annona</i>          | <i>neosalicifolia</i>   | Annonaceae      | Angiosperm      |
| <i>Annona</i>          | <i>rugulosa</i>         | Annonaceae      | Angiosperm      |
| <i>Apuleia</i>         | <i>leiocarpa</i>        | Fabaceae        | Angiosperm      |
| <i>Aralia</i>          | <i>soratensis</i>       | Araliaceae      | Angiosperm      |
| <i>Aralia</i>          | <i>warmingiana</i>      | Araliaceae      | Angiosperm      |
| <i>Araucaria</i>       | <i>angustifolia</i>     | Araucariaceae   | Gymnosperm      |
| <i>Araucaria</i>       | <i>araucana</i>         | Araucariaceae   | Gymnosperm      |
| <i>Archidasphyllum</i> | <i>diacanthoides</i>    | Asteraceae      | Angiosperm      |
| <i>Aristotelia</i>     | <i>chilensis</i>        | Elaeocarpaceae  | Angiosperm      |
| <i>Aspidosperma</i>    | <i>australe</i>         | Apocynaceae     | Angiosperm      |
| <i>Aspidosperma</i>    | <i>polyneuron</i>       | Apocynaceae     | Angiosperm      |
| <i>Aspidosperma</i>    | <i>quebracho-blanco</i> | Apocynaceae     | Angiosperm      |
| <i>Aspidosperma</i>    | <i>triternatum</i>      | Apocynaceae     | Angiosperm      |
| <i>Atamisquea</i>      | <i>emarginata</i>       | Capparaceae     | Angiosperm      |
| <i>Ateleia</i>         | <i>glazioviana</i>      | Fabaceae        | Angiosperm      |
| <i>Athyana</i>         | <i>weinmanniifolia</i>  | Sapindaceae     | Angiosperm      |
| <i>Atriplex</i>        | <i>cordubensis</i>      | Chenopodiaceae  | Angiosperm      |
| <i>Atriplex</i>        | <i>lampa</i>            | Chenopodiaceae  | Angiosperm      |
| <i>Atriplex</i>        | <i>undulata</i>         | Chenopodiaceae  | Angiosperm      |
| <i>Austrocedrus</i>    | <i>chilensis</i>        | Cupressaceae    | Gymnosperm      |
| <i>Azara</i>           | <i>microphylla</i>      | Salicaceae      | Angiosperm      |
| <i>Azara</i>           | <i>salicifolia</i>      | Salicaceae      | Angiosperm      |
| <i>Baccharis</i>       | <i>dracunculifolia</i>  | Asteraceae      | Angiosperm      |
| <i>Baccharis</i>       | <i>salicifolia</i>      | Asteraceae      | Angiosperm      |
| <i>Baccharis</i>       | <i>tucumanensis</i>     | Asteraceae      | Angiosperm      |
| <i>Balfourodendron</i> | <i>riedelianum</i>      | Rutaceae        | Angiosperm      |
| <i>Banara</i>          | <i>tomentosa</i>        | Salicaceae      | Angiosperm      |
| <i>Bastardiopsis</i>   | <i>densiflora</i>       | Malvaceae       | Angiosperm      |
| <i>Bauhinia</i>        | <i>forficata</i>        | Fabaceae        | Angiosperm      |
| <i>Bauhinia</i>        | <i>microstachya</i>     | Fabaceae        | Angiosperm      |
| <i>Berberis</i>        | <i>commutata</i>        | Berberidaceae   | Angiosperm      |
| <i>Berberis</i>        | <i>laurina</i>          | Berberidaceae   | Angiosperm      |
| <i>Berberis</i>        | <i>microphylla</i>      | Berberidaceae   | Angiosperm      |
| <i>Blepharocalyx</i>   | <i>salicifolius</i>     | Myrtaceae       | Angiosperm      |

|                      |                        |                   |            |
|----------------------|------------------------|-------------------|------------|
| <i>Boehmeria</i>     | <i>caudata</i>         | Urticaceae        | Angiosperm |
| <i>Bougainvillea</i> | <i>campanulata</i>     | Nyctaginaceae     | Angiosperm |
| <i>Bougainvillea</i> | <i>praecox</i>         | Nyctaginaceae     | Angiosperm |
| <i>Bougainvillea</i> | <i>spinosa</i>         | Nyctaginaceae     | Angiosperm |
| <i>Bougainvillea</i> | <i>stipitata</i>       | Nyctaginaceae     | Angiosperm |
| <i>Bulnesia</i>      | <i>foliosa</i>         | Zygophyllaceae    | Angiosperm |
| <i>Bulnesia</i>      | <i>retama</i>          | Zygophyllaceae    | Angiosperm |
| <i>Bulnesia</i>      | <i>schickendantzii</i> | Zygophyllaceae    | Angiosperm |
| <i>Butia</i>         | <i>yatay</i>           | Arecaceae         | Angiosperm |
| <i>Cabralea</i>      | <i>canjerana</i>       | Meliaceae         | Angiosperm |
| <i>Cenostigma</i>    | <i>pluviosa</i>        | Fabaceae          | Angiosperm |
| <i>Calliandra</i>    | <i>foliolosa</i>       | Fabaceae          | Angiosperm |
| <i>Calycophyllum</i> | <i>multiflorum</i>     | Rubiaceae         | Angiosperm |
| <i>Campomanesia</i>  | <i>guazumifolia</i>    | Myrtaceae         | Angiosperm |
| <i>Campomanesia</i>  | <i>xanthocarpa</i>     | Myrtaceae         | Angiosperm |
| <i>Capparicordis</i> | <i>tweediana</i>       | Capparaceae       | Angiosperm |
| <i>Capsicum</i>      | <i>recurvatum</i>      | Solanaceae        | Angiosperm |
| <i>Carica</i>        | <i>glandulosa</i>      | Caricaceae        | Angiosperm |
| <i>Carica</i>        | <i>quercifolia</i>     | Caricaceae        | Angiosperm |
| <i>Cascaronia</i>    | <i>astragalina</i>     | Fabaceae          | Angiosperm |
| <i>Casearia</i>      | <i>catharinensis</i>   | Salicaceae        | Angiosperm |
| <i>Casearia</i>      | <i>decandra</i>        | Salicaceae        | Angiosperm |
| <i>Casearia</i>      | <i>sylvestris</i>      | Salicaceae        | Angiosperm |
| <i>Castela</i>       | <i>coccinea</i>        | Simaroubaceae     | Angiosperm |
| <i>Cecropia</i>      | <i>pachystachya</i>    | Urticaceae        | Angiosperm |
| <i>Cedrela</i>       | <i>angustifolia</i>    | Meliaceae         | Angiosperm |
| <i>Cedrela</i>       | <i>balansae</i>        | Meliaceae         | Angiosperm |
| <i>Cedrela</i>       | <i>fissilis</i>        | Meliaceae         | Angiosperm |
| <i>Cedrela</i>       | <i>saltensis</i>       | Meliaceae         | Angiosperm |
| <i>Ceiba</i>         | <i>chodatii</i>        | Malvaceae         | Angiosperm |
| <i>Ceiba</i>         | <i>speciosa</i>        | Malvaceae         | Angiosperm |
| <i>Celtis</i>        | <i>chichape</i>        | Cannabaceae       | Angiosperm |
| <i>Celtis</i>        | <i>ehrenbergiana</i>   | Cannabaceae       | Angiosperm |
| <i>Celtis</i>        | <i>iguanaea</i>        | Cannabaceae       | Angiosperm |
| <i>Celtis</i>        | <i>pallida</i>         | Cannabaceae       | Angiosperm |
| <i>Cephalanthus</i>  | <i>glabratus</i>       | Rubiaceae         | Angiosperm |
| <i>Cestrum</i>       | <i>laevigatum</i>      | Solanaceae        | Angiosperm |
| <i>Chloroleucon</i>  | <i>chacoense</i>       | Fabaceae          | Angiosperm |
| <i>Chloroleucon</i>  | <i>foliolosum</i>      | Fabaceae          | Angiosperm |
| <i>Chloroleucon</i>  | <i>tenuiflorum</i>     | Fabaceae          | Angiosperm |
| <i>Chomelia</i>      | <i>obtusata</i>        | Rubiaceae         | Angiosperm |
| <i>Chrysophyllum</i> | <i>gonocarpum</i>      | Sapotaceae        | Angiosperm |
| <i>Chrysophyllum</i> | <i>marginatum</i>      | Sapotaceae        | Angiosperm |
| <i>Citharexylum</i>  | <i>joergensenii</i>    | Verbenaceae       | Angiosperm |
| <i>Citharexylum</i>  | <i>montevicense</i>    | Verbenaceae       | Angiosperm |
| <i>Citronella</i>    | <i>paniculata</i>      | Cardiopteridaceae | Angiosperm |
| <i>Cnicothamnus</i>  | <i>lorentzii</i>       | Asteraceae        | Angiosperm |
| <i>Cnidioscolus</i>  | <i>vitifolius</i>      | Euphorbiaceae     | Angiosperm |
| <i>Coccoloba</i>     | <i>cordata</i>         | Polygonaceae      | Angiosperm |
| <i>Coccoloba</i>     | <i>tiliacea</i>        | Polygonaceae      | Angiosperm |
| <i>Cochlospermum</i> | <i>tetraporum</i>      | Bixaceae          | Angiosperm |
| <i>Condalia</i>      | <i>buxifolia</i>       | Rhamnaceae        | Angiosperm |
| <i>Condalia</i>      | <i>microphylla</i>     | Rhamnaceae        | Angiosperm |
| <i>Copernicia</i>    | <i>alba</i>            | Arecaceae         | Angiosperm |
| <i>Cordia</i>        | <i>americana</i>       | Boraginaceae      | Angiosperm |
| <i>Cordia</i>        | <i>ecalculata</i>      | Boraginaceae      | Angiosperm |
| <i>Cordia</i>        | <i>sacculia</i>        | Boraginaceae      | Angiosperm |

|                         |                         |                 |            |
|-------------------------|-------------------------|-----------------|------------|
| <i>Cordia</i>           | <i>trichotoma</i>       | Boraginaceae    | Angiosperm |
| <i>Coutarea</i>         | <i>hexandra</i>         | Rubiaceae       | Angiosperm |
| <i>Crinodendron</i>     | <i>tucumanum</i>        | Elaeocarpaceae  | Angiosperm |
| <i>Croton</i>           | <i>piluliferus</i>      | Euphorbiaceae   | Angiosperm |
| <i>Croton</i>           | <i>urucurana</i>        | Euphorbiaceae   | Angiosperm |
| <i>Cupania</i>          | <i>vernalis</i>         | Sapindaceae     | Angiosperm |
| <i>Cybistax</i>         | <i>antisiphilitica</i>  | Bignoniaceae    | Angiosperm |
| <i>Cynophalla</i>       | <i>flexuosa</i>         | Capparaceae     | Angiosperm |
| <i>Cynophalla</i>       | <i>retusa</i>           | Capparaceae     | Angiosperm |
| <i>Dasyphyllum</i>      | <i>brasiliense</i>      | Asteraceae      | Angiosperm |
| <i>Dendropanax</i>      | <i>cuneatus</i>         | Araliaceae      | Angiosperm |
| <i>Diatenopteryx</i>    | <i>sorbifolia</i>       | Sapindaceae     | Angiosperm |
| <i>Didymopanax</i>      | <i>morototoni</i>       | Araliaceae      | Angiosperm |
| <i>Diostea</i>          | <i>juncea</i>           | Verbenaceae     | Angiosperm |
| <i>Diplokeleba</i>      | <i>floribunda</i>       | Sapindaceae     | Angiosperm |
| <i>Discaria</i>         | <i>chacaye</i>          | Rhamnaceae      | Angiosperm |
| <i>Drimys</i>           | <i>winteri</i>          | Winteraceae     | Angiosperm |
| <i>Duranta</i>          | <i>serratifolia</i>     | Verbenaceae     | Angiosperm |
| <i>Embothrium</i>       | <i>coccineum</i>        | Proteaceae      | Angiosperm |
| <i>Enterolobium</i>     | <i>contortisiliquum</i> | Fabaceae        | Angiosperm |
| <i>Erythrina</i>        | <i>crista-galli</i>     | Fabaceae        | Angiosperm |
| <i>Erythrina</i>        | <i>falcata</i>          | Fabaceae        | Angiosperm |
| <i>Erythroxylum</i>     | <i>argentinum</i>       | Erythroxylaceae | Angiosperm |
| <i>Erythroxylum</i>     | <i>cuneifolium</i>      | Erythroxylaceae | Angiosperm |
| <i>Erythroxylum</i>     | <i>deciduum</i>         | Erythroxylaceae | Angiosperm |
| <i>Erythroxylum</i>     | <i>microphyllum</i>     | Erythroxylaceae | Angiosperm |
| <i>Escallonia</i>       | <i>millegrana</i>       | Escalloniaceae  | Angiosperm |
| <i>Eugenia</i>          | <i>burkartiana</i>      | Myrtaceae       | Angiosperm |
| <i>Eugenia</i>          | <i>hyemalis</i>         | Myrtaceae       | Angiosperm |
| <i>Eugenia</i>          | <i>involuta</i>         | Myrtaceae       | Angiosperm |
| <i>Eugenia</i>          | <i>mattosii</i>         | Myrtaceae       | Angiosperm |
| <i>Eugenia</i>          | <i>moraviana</i>        | Myrtaceae       | Angiosperm |
| <i>Eugenia</i>          | <i>myrcianthes</i>      | Myrtaceae       | Angiosperm |
| <i>Eugenia</i>          | <i>pitanga</i>          | Myrtaceae       | Angiosperm |
| <i>Eugenia</i>          | <i>psidiiflora</i>      | Myrtaceae       | Angiosperm |
| <i>Eugenia</i>          | <i>punicifolia</i>      | Myrtaceae       | Angiosperm |
| <i>Eugenia</i>          | <i>pyriformis</i>       | Myrtaceae       | Angiosperm |
| <i>Eugenia</i>          | <i>repanda</i>          | Myrtaceae       | Angiosperm |
| <i>Eugenia</i>          | <i>speciosa</i>         | Myrtaceae       | Angiosperm |
| <i>Eugenia</i>          | <i>uniflora</i>         | Myrtaceae       | Angiosperm |
| <i>Eugenia</i>          | <i>uruguayensis</i>     | Myrtaceae       | Angiosperm |
| <i>Euterpe</i>          | <i>edulis</i>           | Arecaceae       | Angiosperm |
| <i>Fagara</i>           | <i>chiloperone</i>      | Rutaceae        | Angiosperm |
| <i>Ficus</i>            | <i>citrifolia</i>       | Moraceae        | Angiosperm |
| <i>Ficus</i>            | <i>luschnathiana</i>    | Moraceae        | Angiosperm |
| <i>Ficus</i>            | <i>maroma</i>           | Moraceae        | Angiosperm |
| <i>Flourensia</i>       | <i>fibrigii</i>         | Asteraceae      | Angiosperm |
| <i>Geoffroea</i>        | <i>decorticans</i>      | Fabaceae        | Angiosperm |
| <i>Gleditsia</i>        | <i>amorphoides</i>      | Fabaceae        | Angiosperm |
| <i>Gochnatia</i>        | <i>palosanto</i>        | Asteraceae      | Angiosperm |
| <i>Gomidesia</i>        | <i>barituensis</i>      | Myrtaceae       | Angiosperm |
| <i>Gonopterodendron</i> | <i>bonariensis</i>      | Zygophyllaceae  | Angiosperm |
| <i>Gonopterodendron</i> | <i>sarmientoi</i>       | Zygophyllaceae  | Angiosperm |
| <i>Guarea</i>           | <i>kunthiana</i>        | Meliaceae       | Angiosperm |
| <i>Guarea</i>           | <i>macrophylla</i>      | Meliaceae       | Angiosperm |
| <i>Guazuma</i>          | <i>ulmifolia</i>        | Malvaceae       | Angiosperm |
| <i>Guettarda</i>        | <i>uruguensis</i>       | Rubiaceae       | Angiosperm |

|                        |                         |                    |            |
|------------------------|-------------------------|--------------------|------------|
| <i>Handroanthus</i>    | <i>albus</i>            | Bignoniaceae       | Angiosperm |
| <i>Handroanthus</i>    | <i>heptaphyllus</i>     | Bignoniaceae       | Angiosperm |
| <i>Handroanthus</i>    | <i>impetiginosus</i>    | Bignoniaceae       | Angiosperm |
| <i>Handroanthus</i>    | <i>lapacho</i>          | Bignoniaceae       | Angiosperm |
| <i>Handroanthus</i>    | <i>ochraceus</i>        | Bignoniaceae       | Angiosperm |
| <i>Helietta</i>        | <i>apiculata</i>        | Rutaceae           | Angiosperm |
| <i>Heliocarpus</i>     | <i>popayanensis</i>     | Malvaceae          | Angiosperm |
| <i>Hennecartia</i>     | <i>omphalandra</i>      | Monimiaceae        | Angiosperm |
| <i>Holocalyx</i>       | <i>balansae</i>         | Fabaceae           | Angiosperm |
| <i>Ilex</i>            | <i>argentina</i>        | Aquifoliaceae      | Angiosperm |
| <i>Ilex</i>            | <i>brevicuspis</i>      | Aquifoliaceae      | Angiosperm |
| <i>Ilex</i>            | <i>paraguariensis</i>   | Aquifoliaceae      | Angiosperm |
| <i>Inga</i>            | <i>affinis</i>          | Fabaceae           | Angiosperm |
| <i>Inga</i>            | <i>edulis</i>           | Fabaceae           | Angiosperm |
| <i>Inga</i>            | <i>marginata</i>        | Fabaceae           | Angiosperm |
| <i>Inga</i>            | <i>saltensis</i>        | Fabaceae           | Angiosperm |
| <i>Inga</i>            | <i>uraguensis</i>       | Fabaceae           | Angiosperm |
| <i>Jacaranda</i>       | <i>micrantha</i>        | Bignoniaceae       | Angiosperm |
| <i>Jacaranda</i>       | <i>mimosifolia</i>      | Bignoniaceae       | Angiosperm |
| <i>Jacaratia</i>       | <i>spinosa</i>          | Caricaceae         | Angiosperm |
| <i>Jatropha</i>        | <i>hieronymi</i>        | Euphorbiaceae      | Angiosperm |
| <i>Jodina</i>          | <i>rhombifolia</i>      | Cervantesiaceae    | Angiosperm |
| <i>Juglans</i>         | <i>australis</i>        | Juglandaceae       | Angiosperm |
| <i>Juglans</i>         | <i>regia</i>            | Juglandaceae       | Angiosperm |
| <i>Kageneckia</i>      | <i>lanceolata</i>       | Rosaceae           | Angiosperm |
| <i>Lachesiodendron</i> | <i>viridiflorum</i>     | Fabaceae           | Angiosperm |
| <i>Larrea</i>          | <i>cuneifolia</i>       | Zygophyllaceae     | Angiosperm |
| <i>Larrea</i>          | <i>divaricata</i>       | Zygophyllaceae     | Angiosperm |
| <i>Laureliopsis</i>    | <i>philippiana</i>      | Atherospermataceae | Angiosperm |
| <i>Libidibia</i>       | <i>paraguariensis</i>   | Fabaceae           | Angiosperm |
| <i>Lithraea</i>        | <i>molleoides</i>       | Anacardiaceae      | Angiosperm |
| <i>Lomatia</i>         | <i>hirsuta</i>          | Proteaceae         | Angiosperm |
| <i>Lonchocarpus</i>    | <i>lilloi</i>           | Fabaceae           | Angiosperm |
| <i>Lonchocarpus</i>    | <i>muehlbergianus</i>   | Fabaceae           | Angiosperm |
| <i>Lonchocarpus</i>    | <i>nitidus</i>          | Fabaceae           | Angiosperm |
| <i>Loxopterygium</i>   | <i>grisebachii</i>      | Anacardiaceae      | Angiosperm |
| <i>Luehea</i>          | <i>divaricata</i>       | Malvaceae          | Angiosperm |
| <i>Lycium</i>          | <i>boerhaviaefolium</i> | Solanaceae         | Angiosperm |
| <i>Lycium</i>          | <i>cestroides</i>       | Solanaceae         | Angiosperm |
| <i>Lycium</i>          | <i>chilense</i>         | Solanaceae         | Angiosperm |
| <i>Lycium</i>          | <i>cuneatum</i>         | Solanaceae         | Angiosperm |
| <i>Lycium</i>          | <i>morongii</i>         | Solanaceae         | Angiosperm |
| <i>Lycium</i>          | <i>tenuispinosum</i>    | Solanaceae         | Angiosperm |
| <i>Machaerium</i>      | <i>paraguariense</i>    | Fabaceae           | Angiosperm |
| <i>Machaerium</i>      | <i>stipitatum</i>       | Fabaceae           | Angiosperm |
| <i>Maclura</i>         | <i>tinctoria</i>        | Moraceae           | Angiosperm |
| <i>Malvastrum</i>      | <i>uniapiculatum</i>    | Malvaceae          | Angiosperm |
| <i>Mandevilla</i>      | <i>immaculata</i>       | Apocynaceae        | Angiosperm |
| <i>Matayba</i>         | <i>elaeagnoides</i>     | Sapindaceae        | Angiosperm |
| <i>Maytenus</i>        | <i>boaria</i>           | Celastraceae       | Angiosperm |
| <i>Maytenus</i>        | <i>viscifolia</i>       | Celastraceae       | Angiosperm |
| <i>Maytenus</i>        | <i>vitis-idaea</i>      | Celastraceae       | Angiosperm |
| <i>Miconia</i>         | <i>molybdaea</i>        | Melastomataceae    | Angiosperm |
| <i>Microlobius</i>     | <i>foetidus</i>         | Fabaceae           | Angiosperm |
| <i>Mimosa</i>          | <i>bimucronata</i>      | Fabaceae           | Angiosperm |
| <i>Mimosa</i>          | <i>bonplandii</i>       | Fabaceae           | Angiosperm |
| <i>Mimosa</i>          | <i>candelabrum</i>      | Fabaceae           | Angiosperm |

|                       |                        |                 |            |
|-----------------------|------------------------|-----------------|------------|
| <i>Mimosa</i>         | <i>debilis</i>         | Fabaceae        | Angiosperm |
| <i>Mimosa</i>         | <i>detinens</i>        | Fabaceae        | Angiosperm |
| <i>Mimosa</i>         | <i>ostenii</i>         | Fabaceae        | Angiosperm |
| <i>Mimozyanthus</i>   | <i>carinatus</i>       | Fabaceae        | Angiosperm |
| <i>Monteverdia</i>    | <i>ilicifolia</i>      | Celastraceae    | Angiosperm |
| <i>Monteverdia</i>    | <i>spinosa</i>         | Celastraceae    | Angiosperm |
| <i>Morus</i>          | <i>insignis</i>        | Moraceae        | Angiosperm |
| <i>Muelleria</i>      | <i>campestris</i>      | Fabaceae        | Angiosperm |
| <i>Muntingia</i>      | <i>calabura</i>        | Muntingiaceae   | Angiosperm |
| <i>Myracrodruon</i>   | <i>balansae</i>        | Anacardiaceae   | Angiosperm |
| <i>Myracrodruon</i>   | <i>urundeuva</i>       | Anacardiaceae   | Angiosperm |
| <i>Myrceugenia</i>    | <i>lanceolata</i>      | Myrtaceae       | Angiosperm |
| <i>Myrcia</i>         | <i>pubiflora</i>       | Myrtaceae       | Angiosperm |
| <i>Myrcianthes</i>    | <i>cisplatensis</i>    | Myrtaceae       | Angiosperm |
| <i>Myrcianthes</i>    | <i>mato</i>            | Myrtaceae       | Angiosperm |
| <i>Myrcianthes</i>    | <i>minimifolia</i>     | Myrtaceae       | Angiosperm |
| <i>Myrcianthes</i>    | <i>pseudomato</i>      | Myrtaceae       | Angiosperm |
| <i>Myrcianthes</i>    | <i>pungens</i>         | Myrtaceae       | Angiosperm |
| <i>Myriocarpa</i>     | <i>stipitata</i>       | Urticaceae      | Angiosperm |
| <i>Myrocarpus</i>     | <i>frondosus</i>       | Fabaceae        | Angiosperm |
| <i>Myroxylon</i>      | <i>peruiferum</i>      | Fabaceae        | Angiosperm |
| <i>Myrrhinium</i>     | <i>atropurpureum</i>   | Myrtaceae       | Angiosperm |
| <i>Myrsine</i>        | <i>balansae</i>        | Myrtaceae       | Angiosperm |
| <i>Myrsine</i>        | <i>coriacea</i>        | Myrtaceae       | Angiosperm |
| <i>Myrsine</i>        | <i>laetevirens</i>     | Myrtaceae       | Angiosperm |
| <i>Myrsine</i>        | <i>parvula</i>         | Myrtaceae       | Angiosperm |
| <i>Nectandra</i>      | <i>angusta</i>         | Lauraceae       | Angiosperm |
| <i>Nectandra</i>      | <i>angustifolia</i>    | Lauraceae       | Angiosperm |
| <i>Nectandra</i>      | <i>cuspidata</i>       | Lauraceae       | Angiosperm |
| <i>Nectandra</i>      | <i>lanceolata</i>      | Lauraceae       | Angiosperm |
| <i>Nectandra</i>      | <i>membranacea</i>     | Lauraceae       | Angiosperm |
| <i>Nicotiana</i>      | <i>glauca</i>          | Solanaceae      | Angiosperm |
| <i>Nothofagus</i>     | <i>alpina</i>          | Nothofagaceae   | Angiosperm |
| <i>Nothofagus</i>     | <i>antarctica</i>      | Nothofagaceae   | Angiosperm |
| <i>Nothofagus</i>     | <i>betuloides</i>      | Nothofagaceae   | Angiosperm |
| <i>Nothofagus</i>     | <i>dombeyi</i>         | Nothofagaceae   | Angiosperm |
| <i>Nothofagus</i>     | <i>obliqua</i>         | Nothofagaceae   | Angiosperm |
| <i>Nothofagus</i>     | <i>pumilio</i>         | Nothofagaceae   | Angiosperm |
| <i>Ochetophila</i>    | <i>trinervis</i>       | Lauraceae       | Angiosperm |
| <i>Ocotea</i>         | <i>acutifolia</i>      | Lauraceae       | Angiosperm |
| <i>Ocotea</i>         | <i>lancifolia</i>      | Lauraceae       | Angiosperm |
| <i>Ocotea</i>         | <i>porphyria</i>       | Lauraceae       | Angiosperm |
| <i>Ocotea</i>         | <i>puberula</i>        | Lauraceae       | Angiosperm |
| <i>Oreopanax</i>      | <i>kuntzei</i>         | Araliaceae      | Angiosperm |
| <i>Parapiptadenia</i> | <i>excelsa</i>         | Fabaceae        | Angiosperm |
| <i>Parapiptadenia</i> | <i>rigida</i>          | Fabaceae        | Angiosperm |
| <i>Parasenegalia</i>  | <i>visco</i>           | Fabaceae        | Angiosperm |
| <i>Parkinsonia</i>    | <i>aculeata</i>        | Fabaceae        | Angiosperm |
| <i>Parkinsonia</i>    | <i>praecox</i>         | Fabaceae        | Angiosperm |
| <i>Parodiodendron</i> | <i>marginivillosum</i> | Picrodendraceae | Angiosperm |
| <i>Peltophorum</i>    | <i>dubium</i>          | Fabaceae        | Angiosperm |
| <i>Philyra</i>        | <i>brasiliensis</i>    | Euphorbiaceae   | Angiosperm |
| <i>Phoradendron</i>   | <i>habrostachyum</i>   | Viscaceae       | Angiosperm |
| <i>Phyllanthus</i>    | <i>chacoensis</i>      | Phyllanthaceae  | Angiosperm |
| <i>Phyllostylon</i>   | <i>rhamnoides</i>      | Ulmaceae        | Angiosperm |
| <i>Phytolacca</i>     | <i>dioica</i>          | Phytolaccaceae  | Angiosperm |
| <i>Picrasma</i>       | <i>crenata</i>         | Simaroubaceae   | Angiosperm |

|                      |                      |                |            |
|----------------------|----------------------|----------------|------------|
| <i>Pilocarpus</i>    | <i>pennatifolius</i> | Rutaceae       | Angiosperm |
| <i>Piper</i>         | <i>hieronymi</i>     | Piperaceae     | Angiosperm |
| <i>Piper</i>         | <i>tucumanum</i>     | Piperaceae     | Angiosperm |
| <i>Piptadenia</i>    | <i>viridiflora</i>   | Fabaceae       | Angiosperm |
| <i>Pisonia</i>       | <i>zapallo</i>       | Nyctaginaceae  | Angiosperm |
| <i>Plectrocarpa</i>  | <i>tetracantha</i>   | Zygophyllaceae | Angiosperm |
| <i>Plinia</i>        | <i>rivularis</i>     | Myrtaceae      | Angiosperm |
| <i>Podocarpus</i>    | <i>nubigenus</i>     | Podocarpaceae  | Gymnosperm |
| <i>Podocarpus</i>    | <i>parlatorei</i>    | Podocarpaceae  | Gymnosperm |
| <i>Pogonopus</i>     | <i>tubulosus</i>     | Rubiaceae      | Angiosperm |
| <i>Porlieria</i>     | <i>microphylla</i>   | Zygophyllaceae | Angiosperm |
| <i>Pouteria</i>      | <i>gardneriana</i>   | Sapotaceae     | Angiosperm |
| <i>Pouteria</i>      | <i>glomerata</i>     | Sapotaceae     | Angiosperm |
| <i>Pouteria</i>      | <i>salicifolia</i>   | Sapotaceae     | Angiosperm |
| <i>Prosopis</i>      | <i>affinis</i>       | Fabaceae       | Angiosperm |
| <i>Prosopis</i>      | <i>alba</i>          | Fabaceae       | Angiosperm |
| <i>Prosopis</i>      | <i>alpataco</i>      | Fabaceae       | Angiosperm |
| <i>Prosopis</i>      | <i>argentina</i>     | Fabaceae       | Angiosperm |
| <i>Prosopis</i>      | <i>caldenia</i>      | Fabaceae       | Angiosperm |
| <i>Prosopis</i>      | <i>chilensis</i>     | Fabaceae       | Angiosperm |
| <i>Prosopis</i>      | <i>elata</i>         | Fabaceae       | Angiosperm |
| <i>Prosopis</i>      | <i>ferox</i>         | Fabaceae       | Angiosperm |
| <i>Prosopis</i>      | <i>flexuosa</i>      | Fabaceae       | Angiosperm |
| <i>Prosopis</i>      | <i>hassleri</i>      | Fabaceae       | Angiosperm |
| <i>Prosopis</i>      | <i>kuntzei</i>       | Fabaceae       | Angiosperm |
| <i>Prosopis</i>      | <i>nigra</i>         | Fabaceae       | Angiosperm |
| <i>Prosopis</i>      | <i>rubiflora</i>     | Fabaceae       | Angiosperm |
| <i>Prosopis</i>      | <i>ruizleali</i>     | Fabaceae       | Angiosperm |
| <i>Prosopis</i>      | <i>ruscifolia</i>    | Fabaceae       | Angiosperm |
| <i>Prosopis</i>      | <i>sericantha</i>    | Fabaceae       | Angiosperm |
| <i>Prosopis</i>      | <i>torquata</i>      | Fabaceae       | Angiosperm |
| <i>Prosopis</i>      | <i>vinalillo</i>     | Fabaceae       | Angiosperm |
| <i>Prunus</i>        | <i>brasiliensis</i>  | Rosaceae       | Angiosperm |
| <i>Prunus</i>        | <i>subcoriacea</i>   | Rosaceae       | Angiosperm |
| <i>Prunus</i>        | <i>tucumanensis</i>  | Rosaceae       | Angiosperm |
| <i>Pseudobombax</i>  | <i>argentinum</i>    | Malvaceae      | Angiosperm |
| <i>Psidium</i>       | <i>guajava</i>       | Myrtaceae      | Angiosperm |
| <i>Psidium</i>       | <i>striatulum</i>    | Myrtaceae      | Angiosperm |
| <i>Pterogyne</i>     | <i>nitens</i>        | Fabaceae       | Angiosperm |
| <i>Quillaja</i>      | <i>brasiliensis</i>  | Quillajaceae   | Angiosperm |
| <i>Ramorinoa</i>     | <i>girolae</i>       | Fabaceae       | Angiosperm |
| <i>Randia</i>        | <i>ferox</i>         | Rubiaceae      | Angiosperm |
| <i>Randia</i>        | <i>micracantha</i>   | Rubiaceae      | Angiosperm |
| <i>Rauvolfia</i>     | <i>schuelii</i>      | Apocynaceae    | Angiosperm |
| <i>Rauvolfia</i>     | <i>sellowii</i>      | Apocynaceae    | Angiosperm |
| <i>Rhamnus</i>       | <i>sphaerosperma</i> | Rhamnaceae     | Angiosperm |
| <i>Rhaphithamnus</i> | <i>spinosus</i>      | Verbenaceae    | Angiosperm |
| <i>Roupala</i>       | <i>meisneri</i>      | Proteaceae     | Angiosperm |
| <i>Rubus</i>         | <i>brasiliensis</i>  | Rosaceae       | Angiosperm |
| <i>Ruprechtia</i>    | <i>apetala</i>       | Polygonaceae   | Angiosperm |
| <i>Ruprechtia</i>    | <i>brachysepala</i>  | Polygonaceae   | Angiosperm |
| <i>Ruprechtia</i>    | <i>laxiflora</i>     | Polygonaceae   | Angiosperm |
| <i>Ruprechtia</i>    | <i>salicifolia</i>   | Polygonaceae   | Angiosperm |
| <i>Salix</i>         | <i>humboldtiana</i>  | Salicaceae     | Angiosperm |
| <i>Salta</i>         | <i>triflora</i>      | Polygonaceae   | Angiosperm |
| <i>Sambucus</i>      | <i>australis</i>     | Viburnaceae    | Angiosperm |
| <i>Sambucus</i>      | <i>nigra</i>         | Viburnaceae    | Angiosperm |

|                     |                            |                |            |
|---------------------|----------------------------|----------------|------------|
| <i>Sambucus</i>     | <i>peruviana</i>           | Viburnaceae    | Angiosperm |
| <i>Sapindus</i>     | <i>saponaria</i>           | Sapindaceae    | Angiosperm |
| <i>Sapium</i>       | <i>glandulosum</i>         | Euphorbiaceae  | Angiosperm |
| <i>Sapium</i>       | <i>haematospermum</i>      | Euphorbiaceae  | Angiosperm |
| <i>Sarcomphalus</i> | <i>mistol</i>              | Rhamnaceae     | Angiosperm |
| <i>Sarcotoxicum</i> | <i>salicifolium</i>        | Capparaceae    | Angiosperm |
| <i>Schaefferia</i>  | <i>argentinensis</i>       | Celastraceae   | Angiosperm |
| <i>Schinopsis</i>   | <i>balansae</i>            | Anacardiaceae  | Angiosperm |
| <i>Schinopsis</i>   | <i>heterophylla</i>        | Anacardiaceae  | Angiosperm |
| <i>Schinopsis</i>   | <i>lorentzii</i>           | Anacardiaceae  | Angiosperm |
| <i>Schinus</i>      | <i>areira</i>              | Anacardiaceae  | Angiosperm |
| <i>Schinus</i>      | <i>bumelioides</i>         | Anacardiaceae  | Angiosperm |
| <i>Schinus</i>      | <i>fasciculatus</i>        | Anacardiaceae  | Angiosperm |
| <i>Schinus</i>      | <i>gracilipes</i>          | Anacardiaceae  | Angiosperm |
| <i>Schinus</i>      | <i>lentiscifolius</i>      | Anacardiaceae  | Angiosperm |
| <i>Schinus</i>      | <i>longifolius</i>         | Anacardiaceae  | Angiosperm |
| <i>Schinus</i>      | <i>marchandii</i>          | Anacardiaceae  | Angiosperm |
| <i>Schinus</i>      | <i>meyeri</i>              | Anacardiaceae  | Angiosperm |
| <i>Schinus</i>      | <i>molle</i>               | Anacardiaceae  | Angiosperm |
| <i>Schinus</i>      | <i>myrtifolius</i>         | Anacardiaceae  | Angiosperm |
| <i>Schinus</i>      | <i>patagonicus</i>         | Anacardiaceae  | Angiosperm |
| <i>Schinus</i>      | <i>piliferus</i>           | Anacardiaceae  | Angiosperm |
| <i>Schinus</i>      | <i>polygamus</i>           | Anacardiaceae  | Angiosperm |
| <i>Schinus</i>      | <i>praecox</i>             | Anacardiaceae  | Angiosperm |
| <i>Schinus</i>      | <i>roigii</i>              | Anacardiaceae  | Angiosperm |
| <i>Schinus</i>      | <i>sp.</i>                 | Anacardiaceae  | Angiosperm |
| <i>Schinus</i>      | <i>spinosus</i>            | Anacardiaceae  | Angiosperm |
| <i>Schinus</i>      | <i>terebinthifolius</i>    | Anacardiaceae  | Angiosperm |
| <i>Scutia</i>       | <i>buxifolia</i>           | Rhamnaceae     | Angiosperm |
| <i>Sebastiania</i>  | <i>argutidens</i>          | Euphorbiaceae  | Angiosperm |
| <i>Sebastiania</i>  | <i>brasiliensis</i>        | Euphorbiaceae  | Angiosperm |
| <i>Sebastiania</i>  | <i>commersoniana</i>       | Euphorbiaceae  | Angiosperm |
| <i>Seguiera</i>     | <i>aculeata</i>            | Petiveraceae   | Angiosperm |
| <i>Senegalia</i>    | <i>bonariensis</i>         | Fabaceae       | Angiosperm |
| <i>Senegalia</i>    | <i>fiebrigii</i>           | Fabaceae       | Angiosperm |
| <i>Senegalia</i>    | <i>gilliesii</i>           | Fabaceae       | Angiosperm |
| <i>Senegalia</i>    | <i>martii</i>              | Fabaceae       | Angiosperm |
| <i>Senegalia</i>    | <i>polyphylla</i>          | Fabaceae       | Angiosperm |
| <i>Senegalia</i>    | <i>praecox</i>             | Fabaceae       | Angiosperm |
| <i>Senegalia</i>    | <i>tucumanensis</i>        | Fabaceae       | Angiosperm |
| <i>Senna</i>        | <i>aphylla</i>             | Fabaceae       | Angiosperm |
| <i>Senna</i>        | <i>spectabilis</i>         | Fabaceae       | Angiosperm |
| <i>Serjania</i>     | <i>foveata</i>             | Sapindaceae    | Angiosperm |
| <i>Sideroxylon</i>  | <i>obtusifolium</i>        | Sapotaceae     | Angiosperm |
| <i>Siphoneugena</i> | <i>occidentalis</i>        | Myrtaceae      | Angiosperm |
| <i>Solanum</i>      | <i>aligerum</i>            | Solanaceae     | Angiosperm |
| <i>Solanum</i>      | <i>granulosum-leprosum</i> | Solanaceae     | Angiosperm |
| <i>Solanum</i>      | <i>pseudoquina</i>         | Solanaceae     | Angiosperm |
| <i>Solanum</i>      | <i>riparium</i>            | Solanaceae     | Angiosperm |
| <i>Solanum</i>      | <i>sanctae-catharinae</i>  | Solanaceae     | Angiosperm |
| <i>Sorocea</i>      | <i>bonplandii</i>          | Moraceae       | Angiosperm |
| <i>Sorocea</i>      | <i>sprucei</i>             | Moraceae       | Angiosperm |
| <i>Strychnos</i>    | <i>brasiliensis</i>        | Loganiaceae    | Angiosperm |
| <i>Styrax</i>       | <i>leprosus</i>            | Styracaceae    | Angiosperm |
| <i>Styrax</i>       | <i>subargenteus</i>        | Styracaceae    | Angiosperm |
| <i>Suaeda</i>       | <i>divaricata</i>          | Chenopodiaceae | Angiosperm |
| <i>Syagrus</i>      | <i>romanzoffiana</i>       | Arecaceae      | Angiosperm |



|                        |                                      |               |            |
|------------------------|--------------------------------------|---------------|------------|
| <i>Symplocos</i>       | <i>uniflora</i>                      | Symplocaceae  | Angiosperm |
| <i>Tabebuia</i>        | <i>aurea</i>                         | Bignoniaceae  | Angiosperm |
| <i>Tabebuia</i>        | <i>nodosa</i>                        | Bignoniaceae  | Angiosperm |
| <i>Tabernaemontana</i> | <i>catharinensis</i>                 | Apocynaceae   | Angiosperm |
| <i>Tachigali</i>       | <i>aurea</i>                         | Fabaceae      | Angiosperm |
| <i>Tamarix</i>         | <i>ramosissima</i>                   | Tamaricaceae  | Angiosperm |
| <i>Tecoma</i>          | <i>stans</i>                         | Bignoniaceae  | Angiosperm |
| <i>Terminalia</i>      | <i>australis</i>                     | Combretaceae  | Angiosperm |
| <i>Terminalia</i>      | <i>catappa</i>                       | Combretaceae  | Angiosperm |
| <i>Terminalia</i>      | <i>triflora</i>                      | Combretaceae  | Angiosperm |
| <i>Tessaria</i>        | <i>integrifolia</i>                  | Asteraceae    | Angiosperm |
| <i>Tetrorchidium</i>   | <i>rubrivenium</i>                   | Euphorbiaceae | Angiosperm |
| <i>Tipuana</i>         | <i>tipu</i>                          | Fabaceae      | Angiosperm |
| <i>Trema</i>           | <i>micrantha</i>                     | Cannabaceae   | Angiosperm |
| <i>Trichilia</i>       | <i>catigua</i>                       | Meliaceae     | Angiosperm |
| <i>Trichilia</i>       | <i>clausenii</i>                     | Meliaceae     | Angiosperm |
| <i>Trichilia</i>       | <i>elegans</i>                       | Meliaceae     | Angiosperm |
| <i>Trithrinax</i>      | <i>campestris</i>                    | Arecaceae     | Angiosperm |
| <i>Trithrinax</i>      | <i>schizophylla</i> var. <i>bif.</i> | Arecaceae     | Angiosperm |
| <i>Trithrinax</i>      | <i>schizophylla</i>                  | Arecaceae     | Angiosperm |
| <i>Trithrinax</i>      | <i>schizophylla</i> var. <i>sch.</i> | Arecaceae     | Angiosperm |
| <i>Urera</i>           | <i>baccifera</i>                     | Urticaceae    | Angiosperm |
| <i>Urera</i>           | <i>caracasana</i>                    | Urticaceae    | Angiosperm |
| <i>Vachellia</i>       | <i>albicorticata</i>                 | Fabaceae      | Angiosperm |
| <i>Vachellia</i>       | <i>aroma</i>                         | Fabaceae      | Angiosperm |
| <i>Vachellia</i>       | <i>astringens</i>                    | Fabaceae      | Angiosperm |
| <i>Vachellia</i>       | <i>caven</i>                         | Fabaceae      | Angiosperm |
| <i>Vachellia</i>       | <i>macracantha</i>                   | Fabaceae      | Angiosperm |
| <i>Vallesia</i>        | <i>glabra</i>                        | Fabaceae      | Angiosperm |
| <i>Vasconcellea</i>    | <i>quercifolia</i>                   | Caricaceae    | Angiosperm |
| <i>Vassobia</i>        | <i>breviflora</i>                    | Solanaceae    | Angiosperm |
| <i>Viburnum</i>        | <i>semenii</i>                       | Viburnaceae   | Angiosperm |
| <i>Vitex</i>           | <i>megapotamica</i>                  | Lamiaceae     | Angiosperm |
| <i>Weinmannia</i>      | <i>boliviensis</i>                   | Cunoniaceae   | Angiosperm |
| <i>Ximenia</i>         | <i>americana</i>                     | Olacaceae     | Angiosperm |
| <i>Xylosma</i>         | <i>longipetiolata</i>                | Salicaceae    | Angiosperm |
| <i>Xylosma</i>         | <i>pseudosalzmanii</i>               | Salicaceae    | Angiosperm |
| <i>Xylosma</i>         | <i>pubescens</i>                     | Salicaceae    | Angiosperm |
| <i>Xylosma</i>         | <i>tweediana</i>                     | Salicaceae    | Angiosperm |
| <i>Xylosma</i>         | <i>venosa</i>                        | Salicaceae    | Angiosperm |
| <i>Zanthoxylum</i>     | <i>coco</i>                          | Rutaceae      | Angiosperm |
| <i>Zanthoxylum</i>     | <i>fagara</i>                        | Rutaceae      | Angiosperm |
| <i>Zanthoxylum</i>     | <i>petiolare</i>                     | Rutaceae      | Angiosperm |
| <i>Zanthoxylum</i>     | <i>rhoifolium</i>                    | Rutaceae      | Angiosperm |
| <i>Zuccagnia</i>       | <i>punctata</i>                      | Fabaceae      | Angiosperm |

**Table S2.** Plots of the Second National Forest Inventory classified by forest types (Level 1, FT-1) and forest regions (TDF+PAT = Tierra del Fuego and Continental forests along the Andes Mountains, DEL = Delta and islands of Paraná river, ESP = Espinal forests, MON = Monte forests, PCH = Parque Chaqueño forests, YUN = Yunga rainforests, AF = Atlantic forests). Acronyms of each forest type were presented.

| Region          | Level 1                                       | Acronym | Plots | %     |
|-----------------|-----------------------------------------------|---------|-------|-------|
| TDF+PAT<br>6.1% | <i>Austrocedrus chilensis</i> + others        | ACH     | 7     | 3.0%  |
|                 | <i>Nothofagus antarctica</i> + others         | NAN     | 54    | 23.5% |
|                 | <i>Nothofagus betuloides</i> + others         | NBE     | 10    | 4.3%  |
|                 | <i>Nothofagus dombeyi</i> + others            | NDO     | 24    | 10.4% |
|                 | <i>Nothofagus pumilio</i> + others            | NPU     | 135   | 58.7% |
| DEL<br>0.5%     | <i>Euphorbiaceae</i> + others                 | EUP     | 5     | 27.8% |
|                 | <i>Lauraceae</i> + others                     | LAU     | 2     | 11.1% |
|                 | <i>Mimosoideae</i> + others                   | MIM     | 2     | 11.1% |
|                 | <i>Polygonaceae</i> + others                  | POL     | 2     | 11.1% |
|                 | <i>Prosopis</i> + others                      | PRO     | 2     | 11.1% |
|                 | <i>Salicaceae</i> + others                    | SAL     | 5     | 27.8% |
| ESP<br>6.6%     | <i>Celtis</i> + others                        | CEL     | 8     | 3.2%  |
|                 | <i>Euphorbiaceae</i> + others                 | EUP     | 8     | 3.2%  |
|                 | <i>Mimosoideae</i> + others                   | MIM     | 38    | 15.1% |
|                 | <i>Myrtaceae</i> + others                     | MYR     | 16    | 6.4%  |
|                 | <i>Palmera</i> + others                       | PAL     | 11    | 4.4%  |
|                 | <i>Prosopis</i> + others                      | PRO     | 170   | 67.7% |
| MON<br>2.4%     | <i>Aspidosperma quebracho-blanco</i> + others | ASQ     | 5     | 5.4%  |
|                 | <i>Caesalpinoideae</i> + others               | CAE     | 7     | 7.6%  |
|                 | <i>Prosopis</i> + others                      | PRO     | 70    | 76.1% |
|                 | <i>Zygophyllaceae</i> + others                | ZYG     | 10    | 10.9% |
| PCH<br>72.4%    | <i>Anacardiaceae</i> + others                 | ANA     | 31    | 1.1%  |
|                 | <i>Aspidosperma quebracho-blanco</i> + others | ASQ     | 628   | 22.8% |
|                 | <i>Asteraceae</i> + others                    | AST     | 2     | 0.1%  |
|                 | <i>Caesalpinoideae</i> + others               | CAE     | 152   | 5.5%  |
|                 | <i>Calycophyllum multiflorum</i> + others     | CAMU    | 9     | 0.3%  |
|                 | <i>Capparaceae</i> + others                   | CAPP    | 4     | 0.1%  |
|                 | <i>Ceiba</i> + others                         | CEI     | 85    | 3.1%  |
|                 | <i>Celtis</i> + others                        | CEL     | 24    | 0.9%  |
|                 | <i>Cervantesiaceae</i> + others               | CERV    | 8     | 0.3%  |
|                 | <i>Cordia</i> + others                        | COR     | 26    | 0.9%  |
|                 | <i>Euphorbiaceae</i> + others                 | EUP     | 17    | 0.6%  |
|                 | <i>Gonopterodendron sarmientoi</i> + others   | GON     | 83    | 3.0%  |
|                 | <i>Lauraceae</i> + others                     | LAU     | 2     | 0.1%  |
|                 | <i>Mimosoideae</i> + others                   | MIM     | 182   | 6.6%  |
|                 | <i>Moraceae</i> + others                      | MOR     | 7     | 0.3%  |
|                 | <i>Myrtaceae</i> + others                     | MYR     | 11    | 0.4%  |
|                 | <i>Palmera</i> + others                       | PAL     | 95    | 3.5%  |
|                 | <i>Papilionoideae</i> + others                | PAP     | 2     | 0.1%  |
|                 | <i>Phyllostylon rhamnoides</i> + others       | PHY     | 17    | 0.6%  |
|                 | <i>Pisonia zapallo</i> + others               | PIS     | 17    | 0.6%  |
|                 | <i>Polygonaceae</i> + others                  | POL     | 124   | 4.5%  |
|                 | <i>Prosopis</i> + others                      | PRO     | 586   | 21.3% |
|                 | <i>Rhamnaceae</i> + others                    | RHA     | 6     | 0.2%  |
|                 | <i>Salicaceae</i> + others                    | SAL     | 1     | 0.0%  |
|                 | <i>Sapindaceae</i> + others                   | SAP     | 10    | 0.4%  |
|                 | <i>Sapotaceae</i> + others                    | SAPO    | 30    | 1.1%  |
|                 | <i>Sarcomphalus mistol</i> + others           | SAR     | 246   | 8.9%  |
|                 | <i>Schinopsis</i> + others                    | SQC     | 254   | 9.2%  |

|      |                                           |      |    |       |
|------|-------------------------------------------|------|----|-------|
|      | <i>Tabebuia nodosa + others</i>           | TANO | 89 | 3.2%  |
|      | <i>Zanthoxylum + others</i>               | ZAN  | 2  | 0.1%  |
| AF   | <i>Achatocarpaceae + others</i>           | ACHA | 3  | 1.8%  |
| 4.3% | <i>Bastardiopsis densiflora + otra</i>    | BAS  | 10 | 6.1%  |
|      | <i>Caesalpinoideae + others</i>           | CAE  | 6  | 3.7%  |
|      | <i>Caricaceae + others</i>                | CEI  | 2  | 1.2%  |
|      | <i>Ceiba + others</i>                     | CRI  | 2  | 1.2%  |
|      | <i>Cordia + others</i>                    | COR  | 17 | 10.4% |
|      | <i>Euphorbiaceae + others</i>             | EUP  | 2  | 1.2%  |
|      | <i>Helietta apiculata + others</i>        | HEL  | 6  | 3.7%  |
|      | <i>Lamiaceae + others</i>                 | LAM  | 4  | 2.4%  |
|      | <i>Lauraceae + others</i>                 | LAU  | 44 | 26.8% |
|      | <i>Luehea divaricata + others</i>         | LUE  | 10 | 6.1%  |
|      | <i>Meliaceae + others</i>                 | MEL  | 5  | 3.0%  |
|      | <i>Mimosoideae + others</i>               | MIM  | 6  | 3.7%  |
|      | <i>Palmera + others</i>                   | PAL  | 4  | 2.4%  |
|      | <i>Papilionoideae + others</i>            | PAP  | 15 | 9.1%  |
|      | <i>Prunus + others</i>                    | PRU  | 8  | 4.9%  |
|      | <i>Sapindaceae + others</i>               | SAP  | 10 | 6.1%  |
|      | <i>Sapotaceae + others</i>                | SAPO | 8  | 4.9%  |
|      | <i>Urticaceae + others</i>                | URT  | 2  | 1.2%  |
| YUN  | <i>Alnus acuminata + others</i>           | ALN  | 22 | 7.5%  |
| 7.8% | <i>Anacardiaceae + others</i>             | ANA  | 3  | 1.0%  |
|      | <i>Asteraceae + others</i>                | AST  | 2  | 0.7%  |
|      | <i>Bignoniaceae + others</i>              | BIG  | 1  | 0.3%  |
|      | <i>Caesalpinoideae + others</i>           | CAE  | 7  | 2.4%  |
|      | <i>Calycophyllum multiflorum + others</i> | CAMU | 11 | 3.7%  |
|      | <i>Ceiba + others</i>                     | CEI  | 5  | 1.7%  |
|      | <i>Cordia + others</i>                    | COR  | 9  | 3.1%  |
|      | <i>Elaeocarpaceae + others</i>            | ELA  | 1  | 0.3%  |
|      | <i>Euphorbiaceae + others</i>             | EUP  | 5  | 1.7%  |
|      | <i>Lauraceae + others</i>                 | LAU  | 22 | 7.5%  |
|      | <i>Meliaceae + others</i>                 | MEL  | 12 | 4.1%  |
|      | <i>Mimosoideae + others</i>               | MIM  | 80 | 27.1% |
|      | <i>Moraceae + others</i>                  | MOR  | 4  | 1.4%  |
|      | <i>Myrtaceae + others</i>                 | MYR  | 33 | 11.2% |
|      | <i>Papilionoideae + others</i>            | PAP  | 2  | 0.7%  |
|      | <i>Phyllostylon rhamnoides + others</i>   | PHY  | 21 | 7.1%  |
|      | <i>Pisonia zapallo + others</i>           | PIS  | 7  | 2.4%  |
|      | <i>Podocarpus parlatorei + others</i>     | POD  | 15 | 5.1%  |
|      | <i>Polygonaceae + others</i>              | POL  | 6  | 2.0%  |
|      | <i>Rubiaceae + others</i>                 | RUB  | 1  | 0.3%  |
|      | <i>Sapindaceae + others</i>               | SAP  | 9  | 3.1%  |
|      | <i>Sapotaceae + others</i>                | SAPO | 3  | 1.0%  |
|      | <i>Schinopsis + others</i>                | SQC  | 13 | 4.4%  |
|      | <i>Zanthoxylum + others</i>               | ZAN  | 1  | 0.3%  |

**Table S3.** Plots of the Second National Forest Inventory classified by forest types (Level 2 and 3, FT-2 and FT-3) and forest regions (TDF+PAT = Tierra del Fuego and Continental forests along the Andes Mountains, DEL = Delta and islands of Paraná river, ESP = Espinal forests, MON = Monte forests, PCH = Parque Chaqueño forests, YUN = Yunga rainforests, AF = Atlantic forests).

| Level 2 in titles and Level 3 with numbers                                           | TDF+PAT | DEL | ESP | MON | PCH | AF | YUN | Total |
|--------------------------------------------------------------------------------------|---------|-----|-----|-----|-----|----|-----|-------|
| <b><i>Achatocarpaceae + others</i></b>                                               |         |     |     |     |     |    |     |       |
| 1 <i>Achatocarpus praecox</i>                                                        |         |     |     |     |     | 1  |     | 1     |
| 2 <i>Achatocarpus praecox</i> + <i>Bastardiopsis</i>                                 |         |     |     |     |     | 1  |     | 1     |
| 3 <i>Achatocarpus praecox</i> + <i>Erythrina falcata</i> + <i>Trichilia</i>          |         |     |     |     |     | 1  |     | 1     |
| <b><i>Alnus acuminata + others</i></b>                                               |         |     |     |     |     |    |     |       |
| 4 <i>Allophylus edulis</i> + <i>Alnus acuminata</i> + <i>Blepharocalyx</i>           |         |     |     |     |     |    | 1   | 1     |
| 5 <i>Alnus acuminata</i>                                                             |         |     |     |     |     |    | 16  | 16    |
| 6 <i>Alnus acuminata</i> + <i>Podocarpus parlatorei</i>                              |         |     |     |     |     |    | 1   | 1     |
| 7 <i>Alnus acuminata</i> + <i>Podocarpus parlatorei</i> + <i>Parapiptadenia</i>      |         |     |     |     |     |    | 1   | 1     |
| 8 <i>Cordia americana</i> + <i>Alnus acuminata</i>                                   |         |     |     |     |     |    | 1   | 1     |
| 9 <i>Prunus tucumanensis</i> + <i>Alnus acuminata</i>                                |         |     |     |     |     |    | 1   | 1     |
| 10 <i>Xylosma pubescens</i> + <i>Alnus acuminata</i> + <i>Zanthoxylum coco</i>       |         |     |     |     |     |    | 1   | 1     |
| <b><i>Anacardiaceae + others</i></b>                                                 |         |     |     |     |     |    |     |       |
| 11 <i>Lithraea molleoides</i>                                                        |         |     |     |     | 1   |    |     | 1     |
| 12 <i>Lithraea molleoides</i> + <i>Allophylus edulis</i> + <i>Xylosma</i>            |         |     |     |     | 1   |    |     | 1     |
| 13 <i>Lithraea molleoides</i> + <i>Celtis ehrenbergiana</i>                          |         |     |     |     | 2   |    |     | 2     |
| 14 <i>Lithraea molleoides</i> + <i>Prosopis alba</i>                                 |         |     |     |     | 1   |    |     | 1     |
| 15 <i>Lithraea molleoides</i> + <i>Vachellia caven</i>                               |         |     |     |     | 1   |    |     | 1     |
| 16 <i>Lithraea molleoides</i> + <i>Vachellia caven</i> + <i>Kageneckia</i>           |         |     |     |     | 1   |    |     | 1     |
| 17 <i>Myracrodruon balansae</i> + <i>Chrysophyllum</i>                               |         |     |     |     | 1   |    |     | 1     |
| 18 <i>Myracrodruon balansae</i> + <i>Cordia americana</i>                            |         |     |     |     | 2   |    |     | 2     |
| 19 <i>Myracrodruon balansae</i> + <i>Cordia americana</i> + <i>Diplokeleba</i>       |         |     |     |     | 1   |    |     | 1     |
| 20 <i>Myracrodruon balansae</i> + <i>Cordia americana</i> + <i>Diplokeleba</i>       |         |     |     |     | 1   |    |     | 1     |
| 21 <i>Myracrodruon balansae</i> + <i>Cordia americana</i> + <i>Prosopis</i>          |         |     |     |     | 1   |    |     | 1     |
| 22 <i>Myracrodruon balansae</i> + <i>Gleditsia</i>                                   |         |     |     |     | 1   |    |     | 1     |
| 23 <i>Myracrodruon balansae</i> + <i>Gleditsia</i>                                   |         |     |     |     | 1   |    |     | 1     |
| 24 <i>Myracrodruon balansae</i> + <i>Phyllostylon</i>                                |         |     |     |     | 1   |    |     | 1     |
| 25 <i>Myracrodruon balansae</i> + <i>Prosopis nigra</i> + <i>Nectandra</i>           |         |     |     |     | 1   |    |     | 1     |
| 26 <i>Myracrodruon balansae</i> + <i>Prosopis nigra</i> + <i>Schinus</i>             |         |     |     |     | 1   |    |     | 1     |
| 27 <i>Myracrodruon balansae</i> + <i>Syagrus</i>                                     |         |     |     |     | 1   |    |     | 1     |
| 28 <i>Myracrodruon urundeuva</i> + <i>Anadenanthera</i>                              |         |     |     |     |     |    | 1   | 1     |
| 29 <i>Myracrodruon urundeuva</i> + <i>Anadenanthera</i>                              |         |     |     |     |     |    | 1   | 1     |
| 30 <i>Myracrodruon urundeuva</i> + <i>Cedrela</i>                                    |         |     |     |     |     |    | 1   | 1     |
| 31 <i>Schinus areira</i>                                                             |         |     |     |     | 1   |    |     | 1     |
| 32 <i>Schinus fasciculatus</i>                                                       |         |     |     |     | 1   |    |     | 1     |
| 33 <i>Schinus fasciculatus</i> + <i>Senegalia praecox</i> + <i>Phytolacca dioica</i> |         |     |     |     | 1   |    |     | 1     |
| 34 <i>Schinus gracilipes</i> + <i>Sarcomphalus mistol</i> + <i>Prosopis alba</i>     |         |     |     |     | 1   |    |     | 1     |
| 35 <i>Schinus longifolius</i> + <i>Aspidosperma quebracho-blanco</i>                 |         |     |     |     | 1   |    |     | 1     |
| 36 <i>Schinus longifolius</i> + <i>Aspidosperma quebracho-</i>                       |         |     |     |     | 1   |    |     | 1     |
| 37 <i>Schinus longifolius</i> + <i>Bougainvillea stipitata</i>                       |         |     |     |     | 1   |    |     | 1     |
| 38 <i>Schinus longifolius</i> + <i>Prosopis nigra</i> + <i>Prosopis vinalillo</i>    |         |     |     |     | 1   |    |     | 1     |
| 39 <i>Schinus longifolius</i> + <i>Sarcomphalus mistol</i> + <i>Aspidosperma</i>     |         |     |     |     | 1   |    |     | 1     |
| 40 <i>Schinus longifolius</i> + <i>Senegalia praecox</i>                             |         |     |     |     | 1   |    |     | 1     |
| 41 <i>Schinus molle</i> + <i>Sarcomphalus mistol</i>                                 |         |     |     |     | 1   |    |     | 1     |
| 42 <i>Schinus piliferus</i> + <i>Geoffroea decorticans</i> + <i>Prosopis nigra</i>   |         |     |     |     | 1   |    |     | 1     |
| <b><i>Aspidosperma quebracho-blanco + others</i></b>                                 |         |     |     |     |     |    |     |       |
| 43 <i>Aspidosperma quebracho-blanco</i>                                              |         |     |     | 1   | 119 |    |     | 120   |
| 44 <i>Aspidosperma quebracho-blanco</i> + <i>Atamisquea emarginata</i>               |         |     |     |     | 1   |    |     | 1     |
| 45 <i>Aspidosperma quebracho-blanco</i> + <i>Atamisquea</i>                          |         |     |     |     | 1   |    |     | 1     |

|     |                                                                                |    |    |
|-----|--------------------------------------------------------------------------------|----|----|
| 46  | <i>Aspidosperma quebracho-blanco</i> + <i>Bougainvillea</i>                    | 1  | 1  |
| 47  | <i>Aspidosperma quebracho-blanco</i> + <i>Bougainvillea</i>                    | 1  | 1  |
| 48  | <i>Aspidosperma quebracho-blanco</i> + <i>Bougainvillea</i>                    | 1  | 1  |
| 49  | <i>Aspidosperma quebracho-blanco</i> + <i>Bougainvillea</i>                    | 2  | 2  |
| 50  | <i>Aspidosperma quebracho-blanco</i> + <i>Bulnesia retama</i>                  | 2  | 2  |
| 51  | <i>Aspidosperma quebracho-blanco</i> + <i>Castela coccinea</i> + <i>Jodina</i> | 1  | 1  |
| 52  | <i>Aspidosperma quebracho-blanco</i> + <i>Castela</i>                          | 1  | 1  |
| 53  | <i>Aspidosperma quebracho-blanco</i> + <i>Castela</i>                          | 1  | 1  |
| 54  | <i>Aspidosperma quebracho-blanco</i> + <i>Ceiba</i>                            | 1  | 1  |
| 55  | <i>Aspidosperma quebracho-blanco</i> + <i>Celtis</i>                           | 1  | 1  |
| 56  | <i>Aspidosperma quebracho-blanco</i> + <i>Condalia microphylla</i>             | 2  | 2  |
| 57  | <i>Aspidosperma quebracho-blanco</i> + <i>Cynophalla</i>                       | 1  | 1  |
| 58  | <i>Aspidosperma quebracho-blanco</i> + <i>Geoffroea decorticans</i>            | 1  | 1  |
| 59  | <i>Aspidosperma quebracho-blanco</i> + <i>Geoffroea</i>                        | 1  | 1  |
| 60  | <i>Aspidosperma quebracho-blanco</i> + <i>Gonopterodendron</i>                 | 6  | 6  |
| 61  | <i>Aspidosperma quebracho-blanco</i> + <i>Gonopterodendron</i>                 | 1  | 1  |
| 62  | <i>Aspidosperma quebracho-blanco</i> + <i>Gonopterodendron</i>                 | 1  | 1  |
| 63  | <i>Aspidosperma quebracho-blanco</i> + <i>Gonopterodendron</i>                 | 1  | 1  |
| 64  | <i>Aspidosperma quebracho-blanco</i> + <i>Gonopterodendron</i>                 | 1  | 1  |
| 65  | <i>Aspidosperma quebracho-blanco</i> + <i>Gonopterodendron</i>                 | 1  | 1  |
| 66  | <i>Aspidosperma quebracho-blanco</i> + <i>Gonopterodendron</i>                 | 1  | 1  |
| 67  | <i>Aspidosperma quebracho-blanco</i> + <i>Gonopterodendron</i>                 | 1  | 1  |
| 68  | <i>Aspidosperma quebracho-blanco</i> + <i>Gonopterodendron</i>                 | 2  | 2  |
| 69  | <i>Aspidosperma quebracho-blanco</i> + <i>Gonopterodendron</i>                 | 3  | 3  |
| 70  | <i>Aspidosperma quebracho-blanco</i> + <i>Gonopterodendron</i>                 | 1  | 1  |
| 71  | <i>Aspidosperma quebracho-blanco</i> + <i>Gonopterodendron</i>                 | 1  | 1  |
| 72  | <i>Aspidosperma quebracho-blanco</i> + <i>Gonopterodendron</i>                 | 1  | 1  |
| 73  | <i>Aspidosperma quebracho-blanco</i> + <i>Gonopterodendron</i>                 | 1  | 1  |
| 74  | <i>Aspidosperma quebracho-blanco</i> + <i>Larrea divaricata</i>                | 1  | 1  |
| 75  | <i>Aspidosperma quebracho-blanco</i> + <i>Libidibia paraguariensis</i>         | 3  | 3  |
| 76  | <i>Aspidosperma quebracho-blanco</i> + <i>Libidibia</i>                        | 1  | 1  |
| 77  | <i>Aspidosperma quebracho-blanco</i> + <i>Libidibia</i>                        | 1  | 1  |
| 78  | <i>Aspidosperma quebracho-blanco</i> + <i>Libidibia</i>                        | 1  | 1  |
| 79  | <i>Aspidosperma quebracho-blanco</i> + <i>Libidibia</i>                        | 1  | 1  |
| 80  | <i>Aspidosperma quebracho-blanco</i> + <i>Libidibia</i>                        | 3  | 3  |
| 81  | <i>Aspidosperma quebracho-blanco</i> + <i>Libidibia</i>                        | 1  | 1  |
| 82  | <i>Aspidosperma quebracho-blanco</i> + <i>Libidibia</i>                        | 1  | 1  |
| 83  | <i>Aspidosperma quebracho-blanco</i> + <i>Lithraea</i>                         | 1  | 1  |
| 84  | <i>Aspidosperma quebracho-blanco</i> + <i>Maytenus vitis-idaea</i>             | 1  | 1  |
| 85  | <i>Aspidosperma quebracho-blanco</i> + <i>Myracrodruon</i>                     | 1  | 1  |
| 86  | <i>Aspidosperma quebracho-blanco</i> + <i>Nectandra</i>                        | 1  | 1  |
| 87  | <i>Aspidosperma quebracho-blanco</i> + <i>Parkinsonia praecox</i>              | 26 | 26 |
| 88  | <i>Aspidosperma quebracho-blanco</i> + <i>Parkinsonia</i>                      | 1  | 1  |
| 89  | <i>Aspidosperma quebracho-blanco</i> + <i>Parkinsonia</i>                      | 1  | 1  |
| 90  | <i>Aspidosperma quebracho-blanco</i> + <i>Parkinsonia</i>                      | 1  | 1  |
| 91  | <i>Aspidosperma quebracho-blanco</i> + <i>Parkinsonia</i>                      | 1  | 1  |
| 92  | <i>Aspidosperma quebracho-blanco</i> + <i>Parkinsonia</i>                      | 1  | 1  |
| 93  | <i>Aspidosperma quebracho-blanco</i> + <i>Pisonia</i>                          | 1  | 1  |
| 94  | <i>Aspidosperma quebracho-blanco</i> + <i>Pisonia</i>                          | 1  | 1  |
| 95  | <i>Aspidosperma quebracho-blanco</i> + <i>Prosopis alba</i>                    | 2  | 2  |
| 96  | <i>Aspidosperma quebracho-blanco</i> + <i>Prosopis alba</i> + <i>Castela</i>   | 1  | 1  |
| 97  | <i>Aspidosperma quebracho-blanco</i> + <i>Prosopis</i>                         | 1  | 1  |
| 98  | <i>Aspidosperma quebracho-blanco</i> + <i>Prosopis flexuosa</i>                | 28 | 28 |
| 99  | <i>Aspidosperma quebracho-blanco</i> + <i>Prosopis</i>                         | 1  | 1  |
| 100 | <i>Aspidosperma quebracho-blanco</i> + <i>Prosopis</i>                         | 1  | 1  |
| 101 | <i>Aspidosperma quebracho-blanco</i> + <i>Prosopis kuntzei</i>                 | 4  | 4  |
| 102 | <i>Aspidosperma quebracho-blanco</i> + <i>Prosopis</i>                         | 1  | 1  |

|     |                                                                                  |      |    |
|-----|----------------------------------------------------------------------------------|------|----|
| 103 | <i>Aspidosperma quebracho-blanco</i> + <i>Prosopis kuntzei</i> + <i>Salta</i>    | 1    | 1  |
| 104 | <i>Aspidosperma quebracho-blanco</i> + <i>Prosopis nigra</i>                     | 1 29 | 30 |
| 105 | <i>Aspidosperma quebracho-blanco</i> + <i>Prosopis nigra</i> + <i>Libidibia</i>  | 1    | 1  |
| 106 | <i>Aspidosperma quebracho-blanco</i> + <i>Prosopis</i>                           | 2    | 2  |
| 107 | <i>Aspidosperma quebracho-blanco</i> + <i>Prosopis</i>                           | 1    | 1  |
| 108 | <i>Aspidosperma quebracho-blanco</i> + <i>Prosopis</i>                           | 2    | 2  |
| 109 | <i>Aspidosperma quebracho-blanco</i> + <i>Prosopis</i>                           | 3    | 3  |
| 110 | <i>Aspidosperma quebracho-blanco</i> + <i>Prosopis</i>                           | 1    | 1  |
| 111 | <i>Aspidosperma quebracho-blanco</i> + <i>Prosopis</i>                           | 1    | 1  |
| 112 | <i>Aspidosperma quebracho-blanco</i> + <i>Prosopis</i>                           | 1    | 1  |
| 113 | <i>Aspidosperma quebracho-blanco</i> + <i>Prosopis ruscifolia</i>                | 2    | 2  |
| 114 | <i>Aspidosperma quebracho-blanco</i> + <i>Prosopis</i>                           | 1    | 1  |
| 115 | <i>Aspidosperma quebracho-blanco</i> + <i>Prosopis</i>                           | 1    | 1  |
| 116 | <i>Aspidosperma quebracho-blanco</i> + <i>Prosopis torquata</i>                  | 9    | 9  |
| 117 | <i>Aspidosperma quebracho-blanco</i> + <i>Prosopis</i>                           | 1    | 1  |
| 118 | <i>Aspidosperma quebracho-blanco</i> + <i>Prosopis</i>                           | 1    | 1  |
| 119 | <i>Aspidosperma quebracho-blanco</i> + <i>Prosopis</i>                           | 1    | 1  |
| 120 | <i>Aspidosperma quebracho-blanco</i> + <i>Prosopis</i>                           | 1    | 1  |
| 121 | <i>Aspidosperma quebracho-blanco</i> + <i>Ruprechtia</i>                         | 1    | 1  |
| 122 | <i>Aspidosperma quebracho-blanco</i> + <i>Salta triflora</i>                     | 8    | 8  |
| 123 | <i>Aspidosperma quebracho-blanco</i> + <i>Salta</i>                              | 1    | 1  |
| 124 | <i>Aspidosperma quebracho-blanco</i> + <i>Salta triflora</i> + <i>Castela</i>    | 1    | 1  |
| 125 | <i>Aspidosperma quebracho-blanco</i> + <i>Salta triflora</i> + <i>Ceiba</i>      | 1    | 1  |
| 126 | <i>Aspidosperma quebracho-blanco</i> + <i>Salta triflora</i> + <i>Libidibia</i>  | 1    | 1  |
| 127 | <i>Aspidosperma quebracho-blanco</i> + <i>Salta triflora</i> + <i>Prosopis</i>   | 1    | 1  |
| 128 | <i>Aspidosperma quebracho-blanco</i> + <i>Salta</i>                              | 4    | 4  |
| 129 | <i>Aspidosperma quebracho-blanco</i> + <i>Salta</i>                              | 1    | 1  |
| 130 | <i>Aspidosperma quebracho-blanco</i> + <i>Salta</i>                              | 1    | 1  |
| 131 | <i>Aspidosperma quebracho-blanco</i> + <i>Salta triflora</i> + <i>Schinopsis</i> | 5    | 5  |
| 132 | <i>Aspidosperma quebracho-blanco</i> + <i>Salta triflora</i> + <i>Schinopsis</i> | 1    | 1  |
| 133 | <i>Aspidosperma quebracho-blanco</i> + <i>Salta triflora</i> + <i>Senegalia</i>  | 1    | 1  |
| 134 | <i>Aspidosperma quebracho-blanco</i> + <i>Salta triflora</i> + <i>Senegalia</i>  | 1    | 1  |
| 135 | <i>Aspidosperma quebracho-blanco</i> + <i>Salta</i>                              | 1    | 1  |
| 136 | <i>Aspidosperma quebracho-blanco</i> + <i>Salta triflora</i> + <i>Tabebuia</i>   | 2    | 2  |
| 137 | <i>Aspidosperma quebracho-blanco</i> + <i>Salta triflora</i> + <i>Tabebuia</i>   | 1    | 1  |
| 138 | <i>Aspidosperma quebracho-blanco</i> + <i>Salta triflora</i> + <i>Tabebuia</i>   | 1    | 1  |
| 139 | <i>Aspidosperma quebracho-blanco</i> + <i>Salta triflora</i> + <i>Ximenia</i>    | 1    | 1  |
| 140 | <i>Aspidosperma quebracho-blanco</i> + <i>Sarcomphalus mistol</i>                | 42   | 42 |
| 141 | <i>Aspidosperma quebracho-blanco</i> + <i>Sarcomphalus</i>                       | 1    | 1  |
| 142 | <i>Aspidosperma quebracho-blanco</i> + <i>Sarcomphalus</i>                       | 1    | 1  |
| 143 | <i>Aspidosperma quebracho-blanco</i> + <i>Sarcomphalus</i>                       | 1    | 1  |
| 144 | <i>Aspidosperma quebracho-blanco</i> + <i>Sarcomphalus</i>                       | 1    | 1  |
| 145 | <i>Aspidosperma quebracho-blanco</i> + <i>Sarcomphalus</i>                       | 1    | 1  |
| 146 | <i>Aspidosperma quebracho-blanco</i> + <i>Sarcomphalus</i>                       | 1    | 1  |
| 147 | <i>Aspidosperma quebracho-blanco</i> + <i>Sarcomphalus</i>                       | 1    | 1  |
| 148 | <i>Aspidosperma quebracho-blanco</i> + <i>Sarcomphalus</i>                       | 1    | 1  |
| 149 | <i>Aspidosperma quebracho-blanco</i> + <i>Sarcomphalus</i>                       | 1    | 1  |
| 150 | <i>Aspidosperma quebracho-blanco</i> + <i>Sarcomphalus</i>                       | 1    | 1  |
| 151 | <i>Aspidosperma quebracho-blanco</i> + <i>Sarcomphalus</i>                       | 1    | 1  |
| 152 | <i>Aspidosperma quebracho-blanco</i> + <i>Sarcomphalus</i>                       | 3    | 3  |
| 153 | <i>Aspidosperma quebracho-blanco</i> + <i>Sarcomphalus</i>                       | 6    | 6  |
| 154 | <i>Aspidosperma quebracho-blanco</i> + <i>Sarcomphalus</i>                       | 1    | 1  |
| 155 | <i>Aspidosperma quebracho-blanco</i> + <i>Sarcomphalus</i>                       | 2    | 2  |
| 156 | <i>Aspidosperma quebracho-blanco</i> + <i>Sarcomphalus</i>                       | 1    | 1  |
| 157 | <i>Aspidosperma quebracho-blanco</i> + <i>Sarcomphalus</i>                       | 1    | 1  |
| 158 | <i>Aspidosperma quebracho-blanco</i> + <i>Sarcomphalus</i>                       | 1    | 1  |
| 159 | <i>Aspidosperma quebracho-blanco</i> + <i>Sarcomphalus</i>                       | 1    | 1  |

|     |                                                                              |    |    |
|-----|------------------------------------------------------------------------------|----|----|
| 160 | <i>Aspidosperma quebracho-blanco</i> + <i>Sarcomphalus</i>                   | 13 | 13 |
| 161 | <i>Aspidosperma quebracho-blanco</i> + <i>Sarcomphalus</i>                   | 1  | 1  |
| 162 | <i>Aspidosperma quebracho-blanco</i> + <i>Sarcomphalus</i>                   | 1  | 1  |
| 163 | <i>Aspidosperma quebracho-blanco</i> + <i>Sarcomphalus</i>                   | 1  | 1  |
| 164 | <i>Aspidosperma quebracho-blanco</i> + <i>Sarcomphalus</i>                   | 1  | 1  |
| 165 | <i>Aspidosperma quebracho-blanco</i> + <i>Sarcomphalus</i>                   | 1  | 1  |
| 166 | <i>Aspidosperma quebracho-blanco</i> + <i>Sarcomphalus</i>                   | 2  | 2  |
| 167 | <i>Aspidosperma quebracho-blanco</i> + <i>Sarcomphalus</i>                   | 1  | 1  |
| 168 | <i>Aspidosperma quebracho-blanco</i> + <i>Sarcomphalus</i>                   | 3  | 3  |
| 169 | <i>Aspidosperma quebracho-blanco</i> + <i>Sarcomphalus</i>                   | 1  | 1  |
| 170 | <i>Aspidosperma quebracho-blanco</i> + <i>Sarcomphalus</i>                   | 1  | 1  |
| 171 | <i>Aspidosperma quebracho-blanco</i> + <i>Sarcomphalus</i>                   | 1  | 1  |
| 172 | <i>Aspidosperma quebracho-blanco</i> + <i>Sarcomphalus</i>                   | 1  | 1  |
| 173 | <i>Aspidosperma quebracho-blanco</i> + <i>Sarcomphalus</i>                   | 2  | 2  |
| 174 | <i>Aspidosperma quebracho-blanco</i> + <i>Schinopsis balansae</i>            | 1  | 1  |
| 175 | <i>Aspidosperma quebracho-blanco</i> + <i>Schinopsis</i>                     | 2  | 2  |
| 176 | <i>Aspidosperma quebracho-blanco</i> + <i>Schinopsis</i>                     | 1  | 1  |
| 177 | <i>Aspidosperma quebracho-blanco</i> + <i>Schinopsis</i>                     | 1  | 1  |
| 178 | <i>Aspidosperma quebracho-blanco</i> + <i>Schinopsis lorentzii</i>           | 35 | 35 |
| 179 | <i>Aspidosperma quebracho-blanco</i> + <i>Schinopsis</i>                     | 2  | 2  |
| 180 | <i>Aspidosperma quebracho-blanco</i> + <i>Schinopsis</i>                     | 1  | 1  |
| 181 | <i>Aspidosperma quebracho-blanco</i> + <i>Schinopsis</i>                     | 5  | 5  |
| 182 | <i>Aspidosperma quebracho-blanco</i> + <i>Schinopsis</i>                     | 1  | 1  |
| 183 | <i>Aspidosperma quebracho-blanco</i> + <i>Schinopsis</i>                     | 1  | 1  |
| 184 | <i>Aspidosperma quebracho-blanco</i> + <i>Schinopsis</i>                     | 1  | 1  |
| 185 | <i>Aspidosperma quebracho-blanco</i> + <i>Schinopsis</i>                     | 1  | 1  |
| 186 | <i>Aspidosperma quebracho-blanco</i> + <i>Schinopsis</i>                     | 5  | 5  |
| 187 | <i>Aspidosperma quebracho-blanco</i> + <i>Schinopsis</i>                     | 3  | 3  |
| 188 | <i>Aspidosperma quebracho-blanco</i> + <i>Schinopsis</i>                     | 1  | 1  |
| 189 | <i>Aspidosperma quebracho-blanco</i> + <i>Schinopsis</i>                     | 10 | 10 |
| 190 | <i>Aspidosperma quebracho-blanco</i> + <i>Schinopsis</i>                     | 1  | 1  |
| 191 | <i>Aspidosperma quebracho-blanco</i> + <i>Schinopsis</i>                     | 4  | 4  |
| 192 | <i>Aspidosperma quebracho-blanco</i> + <i>Schinopsis</i>                     | 1  | 1  |
| 193 | <i>Aspidosperma quebracho-blanco</i> + <i>Schinopsis</i>                     | 1  | 1  |
| 194 | <i>Aspidosperma quebracho-blanco</i> + <i>Schinopsis</i>                     | 1  | 1  |
| 195 | <i>Aspidosperma quebracho-blanco</i> + <i>Schinopsis</i>                     | 2  | 2  |
| 196 | <i>Aspidosperma quebracho-blanco</i> + <i>Schinopsis</i>                     | 1  | 1  |
| 197 | <i>Aspidosperma quebracho-blanco</i> + <i>Schinus longifolius</i>            | 2  | 2  |
| 198 | <i>Aspidosperma quebracho-blanco</i> + <i>Schinus</i>                        | 1  | 1  |
| 199 | <i>Aspidosperma quebracho-blanco</i> + <i>Schinus</i>                        | 2  | 2  |
| 200 | <i>Aspidosperma quebracho-blanco</i> + <i>Senegalia gilliesii</i>            | 3  | 3  |
| 201 | <i>Aspidosperma quebracho-blanco</i> + <i>Senegalia</i>                      | 1  | 1  |
| 202 | <i>Aspidosperma quebracho-blanco</i> + <i>Senegalia</i>                      | 2  | 2  |
| 203 | <i>Aspidosperma quebracho-blanco</i> + <i>Senegalia</i>                      | 1  | 1  |
| 204 | <i>Aspidosperma quebracho-blanco</i> + <i>Senegalia praecox</i>              | 8  | 8  |
| 205 | <i>Aspidosperma quebracho-blanco</i> + <i>Senegalia</i>                      | 1  | 1  |
| 206 | <i>Aspidosperma quebracho-blanco</i> + <i>Senegalia</i>                      | 1  | 1  |
| 207 | <i>Aspidosperma quebracho-blanco</i> + <i>Senegalia</i>                      | 1  | 1  |
| 208 | <i>Aspidosperma quebracho-blanco</i> + <i>Senegalia</i>                      | 1  | 1  |
| 209 | <i>Aspidosperma quebracho-blanco</i> + <i>Senegalia</i>                      | 1  | 1  |
| 210 | <i>Aspidosperma quebracho-blanco</i> + <i>Sideroxylon obtusifolium</i>       | 1  | 1  |
| 211 | <i>Aspidosperma quebracho-blanco</i> + <i>Sideroxylon</i>                    | 1  | 1  |
| 212 | <i>Aspidosperma quebracho-blanco</i> + <i>Sideroxylon</i>                    | 1  | 1  |
| 213 | <i>Aspidosperma quebracho-blanco</i> + <i>Sideroxylon</i>                    | 1  | 1  |
| 214 | <i>Aspidosperma quebracho-blanco</i> + <i>Tabebuia nodosa</i>                | 4  | 4  |
| 215 | <i>Aspidosperma quebracho-blanco</i> + <i>Tabebuia</i>                       | 1  | 1  |
| 216 | <i>Aspidosperma quebracho-blanco</i> + <i>Tabebuia nodosa</i> + <i>Ceiba</i> | 1  | 1  |

|                                        |                                                                                  |      |     |
|----------------------------------------|----------------------------------------------------------------------------------|------|-----|
| 217                                    | <i>Aspidosperma quebracho-blanco</i> + <i>Tabebuia</i>                           | 2    | 2   |
| 218                                    | <i>Aspidosperma quebracho-blanco</i> + <i>Tabebuia nodosa</i> + <i>Salta</i>     | 1    | 1   |
| 219                                    | <i>Aspidosperma quebracho-blanco</i> + <i>Tabebuia</i>                           | 1    | 1   |
| 220                                    | <i>Aspidosperma quebracho-blanco</i> + <i>Tabebuia</i>                           | 3    | 3   |
| 221                                    | <i>Aspidosperma quebracho-blanco</i> + <i>Tabebuia</i>                           | 1    | 1   |
| 222                                    | <i>Aspidosperma quebracho-blanco</i> + <i>Tabebuia</i>                           | 1    | 1   |
| 223                                    | <i>Aspidosperma quebracho-blanco</i> + <i>Trithrinax schizophylla</i>            | 1    | 1   |
| 224                                    | <i>Aspidosperma quebracho-blanco</i> + <i>Trithrinax schizophylla</i>            | 1    | 1   |
| 225                                    | <i>Aspidosperma quebracho-blanco</i> + <i>Vachellia aroma</i>                    | 2    | 2   |
| 226                                    | <i>Aspidosperma quebracho-blanco</i> + <i>Vachellia astringens</i>               | 1    | 1   |
| 227                                    | <i>Aspidosperma quebracho-blanco</i> + <i>Vachellia caven</i>                    | 3    | 3   |
| 228                                    | <i>Aspidosperma quebracho-blanco</i> + <i>Vachellia</i>                          | 1    | 1   |
| 229                                    | <i>Atamisquea emarginata</i> + <i>Aspidosperma quebracho-</i>                    | 1    | 1   |
| 230                                    | <i>Bougainvillea praecox</i> + <i>Aspidosperma quebracho-</i>                    | 1    | 1   |
| 231                                    | <i>Bougainvillea stipitata</i> + <i>Aspidosperma quebracho-blanco</i>            | 1    | 1   |
| 232                                    | <i>Bulnesia retama</i> + <i>Aspidosperma quebracho-blanco</i>                    | 1    | 1   |
| 233                                    | <i>Condalia microphylla</i>                                                      | 1    | 1   |
| 234                                    | <i>Maytenus boaria</i> + <i>Aspidosperma quebracho-blanco</i>                    | 1    | 1   |
| 235                                    | <i>Ramorinoa girolae</i>                                                         | 1    | 1   |
| 236                                    | <i>Sarcomphalus mistol</i> + <i>Aspidosperma quebracho-blanco</i>                | 46   | 46  |
| 237                                    | <i>Schinus longifolius</i> + <i>Condalia microphylla</i>                         | 1    | 1   |
| 238                                    | <i>Trichilia catigua</i> + <i>Aspidosperma quebracho-</i>                        | 1    | 1   |
| <b>Asteraceae + others</b>             |                                                                                  |      |     |
| 239                                    | <i>Terminalia triflora</i>                                                       | 1    | 1 2 |
| 240                                    | <i>Terminalia triflora</i> + <i>Myrcianthes pseudomato</i> + <i>Tabebuia</i>     |      | 1 1 |
| 241                                    | <i>Terminalia triflora</i> + <i>Syagrus romanzoffiana</i> + <i>Ruprechtia</i>    | 1    | 1   |
| <b>Austrocedrus chilensis + others</b> |                                                                                  |      |     |
| 242                                    | <i>Austrocedrus chilensis</i>                                                    | 3    | 3   |
| 243                                    | <i>Austrocedrus chilensis</i> + <i>Lomatia hirsuta</i>                           | 2    | 2   |
| 244                                    | <i>Austrocedrus chilensis</i> + <i>Maytenus boaria</i>                           | 1    | 1   |
| 245                                    | <i>Austrocedrus chilensis</i> + <i>Nothofagus antarctica</i>                     | 1    | 1   |
| <b>Bastardiopsis densiflora + otra</b> |                                                                                  |      |     |
| 246                                    | <i>Bastardiopsis densiflora</i>                                                  | 1    | 1   |
| 247                                    | <i>Bastardiopsis densiflora</i> + <i>Cabralea canjerana</i> + <i>Prunus</i>      | 1    | 1   |
| 248                                    | <i>Bastardiopsis densiflora</i> + <i>Nectandra angustifolia</i> + <i>Ceiba</i>   | 1    | 1   |
| 249                                    | <i>Bastardiopsis densiflora</i> + <i>Nectandra</i>                               | 1    | 1   |
| 250                                    | <i>Bastardiopsis densiflora</i> + <i>Nectandra angustifolia</i> + <i>Prunus</i>  | 1    | 1   |
| 251                                    | <i>Bastardiopsis densiflora</i> + <i>Phytolacca dioica</i> + <i>Ocotea</i>       | 1    | 1   |
| 252                                    | <i>Bastardiopsis densiflora</i> + <i>Ruprechtia laxiflora</i> + <i>Nectandra</i> | 1    | 1   |
| 253                                    | <i>Ficus luschnathiana</i> + <i>Phytolacca dioica</i>                            | 1    | 1   |
| 254                                    | <i>Phytolacca dioica</i> + <i>Bastardiopsis densiflora</i>                       | 1    | 1   |
| 255                                    | <i>Phytolacca dioica</i> + <i>Bastardiopsis densiflora</i> + <i>Nectandra</i>    | 1    | 1   |
| <b>Bignoniaceae + others</b>           |                                                                                  |      |     |
| 256                                    | <i>Jacaranda mimosifolia</i> + <i>Azara salicifolia</i>                          |      | 1 1 |
| <b>Caesalpinoideae + others</b>        |                                                                                  |      |     |
| 257                                    | <i>Apuleia leiocarpa</i> + <i>Chrysophyllum gonocarpum</i> + <i>Pisonia</i>      | 1    | 1   |
| 258                                    | <i>Apuleia leiocarpa</i> + <i>Chrysophyllum gonocarpum</i> + <i>Trichilia</i>    | 1    | 1   |
| 259                                    | <i>Athyana weinmanniifolia</i> + <i>Libidibia</i>                                | 1    | 1   |
| 260                                    | <i>Geoffroea decorticans</i>                                                     | 6 29 | 35  |
| 261                                    | <i>Geoffroea decorticans</i> + <i>Celtis chichape</i>                            | 1    | 1   |
| 262                                    | <i>Geoffroea decorticans</i> + <i>Celtis ehrenbergiana</i>                       | 2    | 2   |
| 263                                    | <i>Geoffroea decorticans</i> + <i>Copernicia alba</i> + <i>Prosopis nigra</i>    | 1    | 1   |
| 264                                    | <i>Geoffroea decorticans</i> + <i>Gonopterodendron sarmientoi</i>                | 1    | 1   |
| 265                                    | <i>Geoffroea decorticans</i> + <i>Libidibia</i>                                  | 1    | 1   |
| 266                                    | <i>Geoffroea decorticans</i> + <i>Mimozyanthus</i>                               | 1    | 1   |
| 267                                    | <i>Geoffroea decorticans</i> + <i>Parkinsonia</i>                                | 1    | 1   |
| 268                                    | <i>Geoffroea decorticans</i> + <i>Prosopis alba</i>                              | 2    | 2   |



|     |                                                                                   |   |   |   |
|-----|-----------------------------------------------------------------------------------|---|---|---|
| 269 | <i>Geoffroea decorticans</i> + <i>Prosopis flexuosa</i>                           | 1 |   | 1 |
| 270 | <i>Geoffroea decorticans</i> + <i>Prosopis nigra</i>                              |   | 5 | 5 |
| 271 | <i>Geoffroea decorticans</i> + <i>Prosopis nigra</i> + <i>Prosopis alba</i>       |   | 1 | 1 |
| 272 | <i>Geoffroea decorticans</i> + <i>Prosopis ruscifolia</i>                         |   | 3 | 3 |
| 273 | <i>Geoffroea decorticans</i> + <i>Prosopis torquata</i> + <i>Condalia</i>         |   | 1 | 1 |
| 274 | <i>Geoffroea decorticans</i> + <i>Rauvolfia schuelii</i>                          |   | 1 | 1 |
| 275 | <i>Geoffroea decorticans</i> + <i>Sarcomphalus mistol</i>                         |   | 1 | 1 |
| 276 | <i>Geoffroea decorticans</i> + <i>Sarcomphalus mistol</i> + <i>Pterogyne</i>      |   | 1 | 1 |
| 277 | <i>Geoffroea decorticans</i> + <i>Schinopsis balansae</i> + <i>Senegalia</i>      |   | 1 | 1 |
| 278 | <i>Geoffroea decorticans</i> + <i>Senegalia praecox</i> + <i>Schinus</i>          |   | 1 | 1 |
| 279 | <i>Geoffroea decorticans</i> + <i>Tabebuia nodosa</i>                             |   | 2 | 2 |
| 280 | <i>Geoffroea decorticans</i> + <i>Vachellia aroma</i>                             |   | 1 | 1 |
| 281 | <i>Geoffroea decorticans</i> + <i>Vachellia caven</i>                             |   | 1 | 1 |
| 282 | <i>Geoffroea decorticans</i> + <i>Vallesia glabra</i>                             |   | 1 | 1 |
| 283 | <i>Holocalyx balansae</i> + <i>Machaerium stipitatum</i> + <i>Muelleria</i>       |   | 1 | 1 |
| 284 | <i>Holocalyx balansae</i> + <i>Nectandra angustifolia</i> + <i>Apuleia</i>        |   | 1 | 1 |
| 285 | <i>Holocalyx balansae</i> + <i>Nectandra angustifolia</i> + <i>Ficus</i>          |   | 1 | 1 |
| 286 | <i>Libidibia paraguariensis</i>                                                   |   | 2 | 2 |
| 287 | <i>Libidibia paraguariensis</i> + <i>Achatocarpus</i>                             |   | 1 | 1 |
| 288 | <i>Libidibia paraguariensis</i> + <i>Allophylus</i>                               |   | 1 | 1 |
| 289 | <i>Libidibia paraguariensis</i> + <i>Anadenanthera colubrina</i>                  |   |   | 1 |
| 290 | <i>Libidibia paraguariensis</i> + <i>Anadenanthera</i>                            |   |   | 1 |
| 291 | <i>Libidibia paraguariensis</i> + <i>Aspidosperma quebracho-blanco</i>            |   | 2 | 1 |
| 292 | <i>Libidibia paraguariensis</i> + <i>Aspidosperma quebracho-</i>                  |   | 1 | 1 |
| 293 | <i>Libidibia paraguariensis</i> + <i>Aspidosperma quebracho-</i>                  |   | 1 | 1 |
| 294 | <i>Libidibia paraguariensis</i> + <i>Aspidosperma quebracho-</i>                  |   | 1 | 1 |
| 295 | <i>Libidibia paraguariensis</i> + <i>Aspidosperma quebracho-</i>                  |   | 1 | 1 |
| 296 | <i>Libidibia paraguariensis</i> + <i>Calycophyllum</i>                            |   | 1 | 1 |
| 297 | <i>Libidibia paraguariensis</i> + <i>Calycophyllum</i>                            |   | 1 | 1 |
| 298 | <i>Libidibia paraguariensis</i> + <i>Cordia americana</i> + <i>Schinopsis</i>     |   | 1 | 1 |
| 299 | <i>Libidibia paraguariensis</i> + <i>Gleditsia amorphoides</i>                    |   | 1 | 1 |
| 300 | <i>Libidibia paraguariensis</i> + <i>Gleditsia</i>                                |   | 1 | 1 |
| 301 | <i>Libidibia paraguariensis</i> + <i>Gleditsia</i>                                |   | 1 | 1 |
| 302 | <i>Libidibia paraguariensis</i> + <i>Gleditsia</i>                                |   | 1 | 1 |
| 303 | <i>Libidibia paraguariensis</i> + <i>Myracrodruon balansae</i> + <i>Cordia</i>    |   | 1 | 1 |
| 304 | <i>Libidibia paraguariensis</i> + <i>Myracrodruon</i>                             |   | 1 | 1 |
| 305 | <i>Libidibia paraguariensis</i> + <i>Myracrodruon</i>                             |   | 1 | 1 |
| 306 | <i>Libidibia paraguariensis</i> + <i>Parapiptadenia excelsa</i> + <i>Duranta</i>  |   | 1 | 1 |
| 307 | <i>Libidibia paraguariensis</i> + <i>Parkinsonia praecox</i>                      |   | 1 | 1 |
| 308 | <i>Libidibia paraguariensis</i> + <i>Phyllostylon</i>                             |   | 1 | 1 |
| 309 | <i>Libidibia paraguariensis</i> + <i>Phyllostylon</i>                             |   | 1 | 1 |
| 310 | <i>Libidibia paraguariensis</i> + <i>Prosopis nigra</i> + <i>Calycophyllum</i>    |   | 1 | 1 |
| 311 | <i>Libidibia paraguariensis</i> + <i>Ruprechtia apetala</i>                       |   | 1 | 1 |
| 312 | <i>Libidibia paraguariensis</i> + <i>Ruprechtia apetala</i> + <i>Prosopis</i>     |   | 1 | 1 |
| 313 | <i>Libidibia paraguariensis</i> + <i>Ruprechtia apetala</i> + <i>Senegalia</i>    |   | 1 | 1 |
| 314 | <i>Libidibia paraguariensis</i> + <i>Ruprechtia laxiflora</i> + <i>Cordia</i>     |   | 1 | 1 |
| 315 | <i>Libidibia paraguariensis</i> + <i>Ruprechtia laxiflora</i> + <i>Gleditsia</i>  |   | 1 | 1 |
| 316 | <i>Libidibia paraguariensis</i> + <i>Ruprechtia</i>                               |   | 1 | 1 |
| 317 | <i>Libidibia paraguariensis</i> + <i>Ruprechtia laxiflora</i> + <i>Schinopsis</i> |   | 1 | 1 |
| 318 | <i>Libidibia paraguariensis</i> + <i>Salta triflora</i>                           |   | 2 | 2 |
| 319 | <i>Libidibia paraguariensis</i> + <i>Salta triflora</i> + <i>Bougainvillea</i>    |   | 1 | 1 |
| 320 | <i>Libidibia paraguariensis</i> + <i>Salta triflora</i> + <i>Prosopis</i>         |   | 1 | 1 |
| 321 | <i>Libidibia paraguariensis</i> + <i>Salta triflora</i> + <i>Schinopsis</i>       |   | 1 | 1 |
| 322 | <i>Libidibia paraguariensis</i> + <i>Sarcomphalus mistol</i>                      |   |   | 1 |
| 323 | <i>Libidibia paraguariensis</i> + <i>Sarcomphalus mistol</i> + <i>Castela</i>     |   | 1 | 1 |
| 324 | <i>Libidibia paraguariensis</i> + <i>Sarcomphalus mistol</i> + <i>Salta</i>       |   | 1 | 1 |
| 325 | <i>Libidibia paraguariensis</i> + <i>Sarcomphalus mistol</i> + <i>Schinopsis</i>  |   | 1 | 1 |

|                                                  |                                                                                    |   |   |
|--------------------------------------------------|------------------------------------------------------------------------------------|---|---|
| 326                                              | <i>Libidibia paraguariensis</i> + <i>Schinopsis balansae</i> + <i>Cordia</i>       | 1 | 1 |
| 327                                              | <i>Libidibia paraguariensis</i> + <i>Schinopsis balansae</i> + <i>Trithrinax</i>   | 1 | 1 |
| 328                                              | <i>Libidibia paraguariensis</i> + <i>Schinopsis lorentzii</i>                      | 1 | 1 |
| 329                                              | <i>Libidibia paraguariensis</i> + <i>Schinopsis lorentzii</i> + <i>Schinus</i>     | 1 | 1 |
| 330                                              | <i>Libidibia paraguariensis</i> + <i>Senegalia gilliesii</i> + <i>Aspidosperma</i> | 1 | 1 |
| 331                                              | <i>Libidibia paraguariensis</i> + <i>Senegalia praecox</i>                         | 1 | 1 |
| 332                                              | <i>Libidibia paraguariensis</i> + <i>Sideroxylon</i>                               | 1 | 1 |
| 333                                              | <i>Libidibia paraguariensis</i> + <i>Sideroxylon</i>                               | 1 | 1 |
| 334                                              | <i>Libidibia paraguariensis</i> + <i>Tabebuia nodosa</i> + <i>Anisocapparis</i>    | 1 | 1 |
| 335                                              | <i>Libidibia paraguariensis</i> + <i>Tabebuia nodosa</i> + <i>Salta triflora</i>   | 1 | 1 |
| 336                                              | <i>Maytenus vitis-idaea</i> + <i>Libidibia paraguariensis</i>                      | 1 | 1 |
| 337                                              | <i>Parkinsonia praecox</i> + <i>Aspidosperma quebracho-blanco</i>                  | 8 | 8 |
| 338                                              | <i>Parkinsonia praecox</i> + <i>Aspidosperma quebracho-</i>                        | 1 | 1 |
| 339                                              | <i>Parkinsonia praecox</i> + <i>Aspidosperma quebracho-</i>                        | 1 | 1 |
| 340                                              | <i>Parkinsonia praecox</i> + <i>Atamisquea emarginata</i>                          | 1 | 1 |
| 341                                              | <i>Parkinsonia praecox</i> + <i>Geoffroea</i>                                      | 1 | 1 |
| 342                                              | <i>Parkinsonia praecox</i> + <i>Prosopis flexuosa</i>                              | 6 | 6 |
| 343                                              | <i>Parkinsonia praecox</i> + <i>Prosopis flexuosa</i> + <i>Aspidosperma</i>        | 1 | 1 |
| 344                                              | <i>Parkinsonia praecox</i> + <i>Prosopis nigra</i>                                 | 5 | 5 |
| 345                                              | <i>Parkinsonia praecox</i> + <i>Prosopis nigra</i> + <i>Aspidosperma</i>           | 1 | 1 |
| 346                                              | <i>Parkinsonia praecox</i> + <i>Prosopis nigra</i> + <i>Aspidosperma</i>           | 1 | 1 |
| 347                                              | <i>Parkinsonia praecox</i> + <i>Prosopis nigra</i> + <i>Schinopsis lorentzii</i>   | 1 | 1 |
| 348                                              | <i>Parkinsonia praecox</i> + <i>Prosopis nigra</i> + <i>Vachellia aroma</i>        | 1 | 1 |
| 349                                              | <i>Parkinsonia praecox</i> + <i>Prosopis ruscifolia</i>                            | 1 | 1 |
| 350                                              | <i>Parkinsonia praecox</i> + <i>Prosopis torquata</i>                              | 1 | 1 |
| 351                                              | <i>Parkinsonia praecox</i> + <i>Salta triflora</i> + <i>Prosopis elata</i>         | 1 | 1 |
| 352                                              | <i>Parkinsonia praecox</i> + <i>Sarcomphalus mistol</i> + <i>Schinopsis</i>        | 1 | 1 |
| 353                                              | <i>Parkinsonia praecox</i> + <i>Schinopsis lorentzii</i>                           | 2 | 2 |
| 354                                              | <i>Parkinsonia praecox</i> + <i>Tabebuia nodosa</i>                                | 1 | 1 |
| 355                                              | <i>Parkinsonia praecox</i> + <i>Vachellia astringens</i>                           | 1 | 1 |
| 356                                              | <i>Peltophorum dubium</i> + <i>Enterolobium</i>                                    | 1 | 1 |
| 357                                              | <i>Peltophorum dubium</i> + <i>Euterpe edulis</i>                                  | 1 | 1 |
| 358                                              | <i>Pterogyne nitens</i> + <i>Maclura tinctoria</i>                                 |   | 1 |
| 359                                              | <i>Pterogyne nitens</i> + <i>Salta triflora</i> + <i>Phyllostylon rhamnoides</i>   | 1 | 1 |
| 360                                              | <i>Pterogyne nitens</i> + <i>Sarcomphalus mistol</i> + <i>Parkinsonia</i>          | 1 | 1 |
| 361                                              | <i>Pterogyne nitens</i> + <i>Vachellia caven</i> + <i>Albizia</i>                  | 1 | 1 |
| 362                                              | <i>Schinus marchandii</i> + <i>Libidibia paraguariensis</i>                        | 1 | 1 |
| <b><i>Calycophyllum multiflorum</i> + others</b> |                                                                                    |   |   |
| 363                                              | <i>Calycophyllum multiflorum</i> + <i>Anadenanthera</i>                            |   | 1 |
| 364                                              | <i>Calycophyllum multiflorum</i> + <i>Aspidosperma quebracho-</i>                  | 1 | 1 |
| 365                                              | <i>Calycophyllum multiflorum</i> + <i>Cordia americana</i> + <i>Eugenia</i>        | 1 | 1 |
| 366                                              | <i>Calycophyllum multiflorum</i> + <i>Gonopterodendron</i>                         | 1 | 1 |
| 367                                              | <i>Calycophyllum multiflorum</i> + <i>Libidibia</i>                                | 1 | 1 |
| 368                                              | <i>Calycophyllum multiflorum</i> + <i>Libidibia</i>                                | 1 | 1 |
| 369                                              | <i>Calycophyllum multiflorum</i> + <i>Phyllostylon</i>                             |   | 1 |
| 370                                              | <i>Calycophyllum multiflorum</i> + <i>Prosopis alba</i> + <i>Prosopis</i>          | 1 | 1 |
| 371                                              | <i>Calycophyllum multiflorum</i> + <i>Salta triflora</i>                           | 1 | 1 |
| 372                                              | <i>Calycophyllum multiflorum</i> + <i>Salta triflora</i> + <i>Anadenanthera</i>    |   | 1 |
| 373                                              | <i>Calycophyllum multiflorum</i> + <i>Schinopsis lorentzii</i>                     | 1 | 1 |
| 374                                              | <i>Calycophyllum multiflorum</i> + <i>Sideroxylon</i>                              | 1 | 1 |
| 375                                              | <i>Calycophyllum multiflorum</i> + <i>Terminalia triflora</i> + <i>Ceiba</i>       |   | 1 |
| 376                                              | <i>Cordia trichotoma</i> + <i>Parapiptadenia excelsa</i> + <i>Aspidosperma</i>     |   | 1 |
| 377                                              | <i>Erythrina crista-galli</i> + <i>Allophylus edulis</i>                           |   | 1 |
| 378                                              | <i>Lonchocarpus lilloi</i> + <i>Parasenegalia visco</i> + <i>Tipuana tipu</i>      |   | 1 |
| 379                                              | <i>Tipuana tipu</i>                                                                |   | 3 |
| 380                                              | <i>Tipuana tipu</i> + <i>Blepharocalyx salicifolius</i> + <i>Scutia</i>            |   | 1 |
| <b><i>Capparaceae</i> + others</b>               |                                                                                    |   |   |

|                            |                                                                                    |    |   |    |
|----------------------------|------------------------------------------------------------------------------------|----|---|----|
| 381                        | <i>Anisocapparis speciosa</i> + <i>Salta triflora</i> + <i>Aspidosperma</i>        | 1  |   | 1  |
| 382                        | <i>Capparicordis tweediana</i>                                                     | 1  |   | 1  |
| 383                        | <i>Cynophalla retusa</i> + <i>Acanthosyris</i>                                     | 1  |   | 1  |
| 384                        | <i>Cynophalla retusa</i> + <i>Cordia americana</i>                                 | 1  |   | 1  |
| <b>Caricaceae + others</b> |                                                                                    |    |   |    |
| 385                        | <i>Jacaratia spinosa</i> + <i>Cabralea canjerana</i> + <i>Holocalyx</i>            |    | 1 | 1  |
| 386                        | <i>Jacaratia spinosa</i> + <i>Chrysophyllum gonocarpum</i> + <i>Cordia</i>         |    | 1 | 1  |
| <b>Ceiba + others</b>      |                                                                                    |    |   |    |
| 387                        | <i>Aspidosperma quebracho-blanco</i> + <i>Ceiba chodatii</i>                       | 2  |   | 2  |
| 388                        | <i>Aspidosperma quebracho-blanco</i> + <i>Ceiba</i>                                | 1  |   | 1  |
| 389                        | <i>Ceiba chodatii</i>                                                              | 14 | 1 | 15 |
| 390                        | <i>Ceiba chodatii</i> + <i>Achatocarpus praecox</i> + <i>Prosopis</i>              | 1  |   | 1  |
| 391                        | <i>Ceiba chodatii</i> + <i>Anadenanthera colubrina</i>                             | 3  |   | 3  |
| 392                        | <i>Ceiba chodatii</i> + <i>Anadenanthera colubrina</i> + <i>Agonandra</i>          |    | 1 | 1  |
| 393                        | <i>Ceiba chodatii</i> + <i>Anadenanthera colubrina</i> + <i>Salta triflora</i>     | 1  |   | 1  |
| 394                        | <i>Ceiba chodatii</i> + <i>Anadenanthera colubrina</i> + <i>Schinopsis</i>         | 1  |   | 1  |
| 395                        | <i>Ceiba chodatii</i> + <i>Aspidosperma quebracho-blanco</i>                       | 5  |   | 5  |
| 396                        | <i>Ceiba chodatii</i> + <i>Aspidosperma quebracho-</i>                             | 1  |   | 1  |
| 397                        | <i>Ceiba chodatii</i> + <i>Aspidosperma quebracho-blanco</i> + <i>Salta</i>        | 2  |   | 2  |
| 398                        | <i>Ceiba chodatii</i> + <i>Aspidosperma quebracho-</i>                             | 1  |   | 1  |
| 399                        | <i>Ceiba chodatii</i> + <i>Aspidosperma quebracho-</i>                             | 1  |   | 1  |
| 400                        | <i>Ceiba chodatii</i> + <i>Aspidosperma quebracho-</i>                             | 2  |   | 2  |
| 401                        | <i>Ceiba chodatii</i> + <i>Aspidosperma quebracho-</i>                             | 1  |   | 1  |
| 402                        | <i>Ceiba chodatii</i> + <i>Aspidosperma quebracho-blanco</i> + <i>Ximenia</i>      | 1  |   | 1  |
| 403                        | <i>Ceiba chodatii</i> + <i>Calycophyllum multiflorum</i> + <i>Salta triflora</i>   | 1  |   | 1  |
| 404                        | <i>Ceiba chodatii</i> + <i>Gleditsia amorphoides</i> + <i>Jacaranda</i>            |    | 1 | 1  |
| 405                        | <i>Ceiba chodatii</i> + <i>Gonopterodendron sarmientoi</i>                         | 1  |   | 1  |
| 406                        | <i>Ceiba chodatii</i> + <i>Gonopterodendron</i>                                    | 1  |   | 1  |
| 407                        | <i>Ceiba chodatii</i> + <i>Gonopterodendron sarmientoi</i> + <i>Salta</i>          | 1  |   | 1  |
| 408                        | <i>Ceiba chodatii</i> + <i>Gonopterodendron sarmientoi</i> + <i>Salta</i>          | 1  |   | 1  |
| 409                        | <i>Ceiba chodatii</i> + <i>Handroanthus impetiginosus</i> + <i>Senegalia</i>       | 1  |   | 1  |
| 410                        | <i>Ceiba chodatii</i> + <i>Libidibia paraguariensis</i> + <i>Aspidosperma</i>      | 1  |   | 1  |
| 411                        | <i>Ceiba chodatii</i> + <i>Mimozyanthus carinatus</i>                              | 1  |   | 1  |
| 412                        | <i>Ceiba chodatii</i> + <i>Muelleria campestris</i> + <i>Balfourodendron</i>       |    | 1 | 1  |
| 413                        | <i>Ceiba chodatii</i> + <i>Pisonia zapallo</i>                                     |    | 1 | 1  |
| 414                        | <i>Ceiba chodatii</i> + <i>Prosopis alba</i> + <i>Salta</i>                        | 1  |   | 1  |
| 415                        | <i>Ceiba chodatii</i> + <i>Salta triflora</i>                                      | 6  |   | 6  |
| 416                        | <i>Ceiba chodatii</i> + <i>Salta triflora</i> + <i>Gonopterodendron</i>            | 1  |   | 1  |
| 417                        | <i>Ceiba chodatii</i> + <i>Salta triflora</i> + <i>Prosopis vinalillo</i>          | 1  |   | 1  |
| 418                        | <i>Ceiba chodatii</i> + <i>Salta triflora</i> + <i>Schinopsis lorentzii</i>        | 1  |   | 1  |
| 419                        | <i>Ceiba chodatii</i> + <i>Sarcomphalus mistol</i>                                 | 1  |   | 1  |
| 420                        | <i>Ceiba chodatii</i> + <i>Sarcomphalus mistol</i> + <i>Aspidosperma</i>           | 1  |   | 1  |
| 421                        | <i>Ceiba chodatii</i> + <i>Sarcomphalus mistol</i> + <i>Salta triflora</i>         | 1  |   | 1  |
| 422                        | <i>Ceiba chodatii</i> + <i>Sarcomphalus mistol</i> + <i>Schinopsis lorentzii</i>   | 2  |   | 2  |
| 423                        | <i>Ceiba chodatii</i> + <i>Sarcomphalus mistol</i> + <i>Schinopsis</i>             | 1  |   | 1  |
| 424                        | <i>Ceiba chodatii</i> + <i>Schinopsis lorentzii</i>                                | 7  | 1 | 8  |
| 425                        | <i>Ceiba chodatii</i> + <i>Schinopsis lorentzii</i> + <i>Bougainvillea praecox</i> | 1  |   | 1  |
| 426                        | <i>Ceiba chodatii</i> + <i>Schinopsis lorentzii</i> + <i>Libidibia</i>             | 1  |   | 1  |
| 427                        | <i>Ceiba chodatii</i> + <i>Schinopsis lorentzii</i> + <i>Salta triflora</i>        | 1  |   | 1  |
| 428                        | <i>Ceiba chodatii</i> + <i>Tabebuia nodosa</i> + <i>Salta</i>                      | 1  |   | 1  |
| 429                        | <i>Ceiba chodatii</i> + <i>Tabebuia nodosa</i> + <i>Schinopsis lorentzii</i>       | 1  |   | 1  |
| 430                        | <i>Gonopterodendron sarmientoi</i> + <i>Ceiba</i>                                  | 1  |   | 1  |
| 431                        | <i>Prosopis alba</i>                                                               |    | 1 | 1  |
| 432                        | <i>Prosopis kuntzei</i> + <i>Ceiba chodatii</i> + <i>Salta</i>                     | 1  |   | 1  |
| 433                        | <i>Salta triflora</i> + <i>Ceiba chodatii</i> + <i>Gonopterodendron</i>            | 1  |   | 1  |
| 434                        | <i>Sarcomphalus mistol</i> + <i>Ceiba chodatii</i>                                 | 2  |   | 2  |
| 435                        | <i>Sarcomphalus mistol</i> + <i>Ceiba chodatii</i> + <i>Aspidosperma</i>           | 1  |   | 1  |

|                                               |                                                                                  |   |   |
|-----------------------------------------------|----------------------------------------------------------------------------------|---|---|
| 436                                           | <i>Sarcomphalus mistol</i> + <i>Ceiba chodatii</i> + <i>Senegalia</i>            | 1 | 1 |
| 437                                           | <i>Sarcotoxicon salicifolium</i> + <i>Ceiba</i>                                  | 1 | 1 |
| 438                                           | <i>Schinopsis lorentzii</i>                                                      | 1 | 1 |
| 439                                           | <i>Schinopsis lorentzii</i> + <i>Ceiba chodatii</i> + <i>Libidibia</i>           | 1 | 1 |
| 440                                           | <i>Sideroxylon obtusifolium</i> + <i>Ceiba chodatii</i> + <i>Pisonia zapallo</i> | 1 | 1 |
| 441                                           | <i>Trithrinax schizophylla</i> var. <i>biflabellata</i> + <i>Ceiba</i>           | 1 | 1 |
| <b><i>Celtis</i> + <i>others</i></b>          |                                                                                  |   |   |
| 442                                           | <i>Celtis ehrenbergiana</i>                                                      | 2 | 4 |
| 443                                           | <i>Celtis ehrenbergiana</i> + <i>Anadenanthera colubrina</i>                     | 1 | 1 |
| 444                                           | <i>Celtis ehrenbergiana</i> + <i>Geoffroea decorticans</i>                       | 1 | 1 |
| 445                                           | <i>Celtis ehrenbergiana</i> + <i>Mimozyanthus carinatus</i>                      | 1 | 1 |
| 446                                           | <i>Celtis ehrenbergiana</i> + <i>Parasenegalia visco</i> + <i>Lithraea</i>       | 1 | 1 |
| 447                                           | <i>Celtis ehrenbergiana</i> + <i>Prosopis affinis</i>                            | 1 | 2 |
| 448                                           | <i>Celtis ehrenbergiana</i> + <i>Prosopis alba</i>                               | 2 | 2 |
| 449                                           | <i>Celtis ehrenbergiana</i> + <i>Prosopis nigra</i>                              | 1 | 4 |
| 450                                           | <i>Celtis ehrenbergiana</i> + <i>Ruprechtia laxiflora</i> + <i>Berberis</i>      | 1 | 1 |
| 451                                           | <i>Celtis ehrenbergiana</i> + <i>Sarcomphalus mistol</i>                         | 1 | 1 |
| 452                                           | <i>Celtis ehrenbergiana</i> + <i>Schinus fasciculatus</i>                        | 1 | 1 |
| 453                                           | <i>Celtis ehrenbergiana</i> + <i>Schinus longifolius</i>                         | 1 | 1 |
| 454                                           | <i>Celtis ehrenbergiana</i> + <i>Senegalia praecox</i> + <i>Ruprechtia</i>       | 1 | 1 |
| 455                                           | <i>Celtis ehrenbergiana</i> + <i>Sideroxylon</i>                                 | 1 | 1 |
| 456                                           | <i>Celtis ehrenbergiana</i> + <i>Terminalia australis</i>                        | 1 | 1 |
| 457                                           | <i>Celtis ehrenbergiana</i> + <i>Vachellia aroma</i>                             | 3 | 3 |
| 458                                           | <i>Celtis ehrenbergiana</i> + <i>Vachellia aroma</i> + <i>Bougainvillea</i>      | 1 | 1 |
| 459                                           | <i>Celtis ehrenbergiana</i> + <i>Vachellia caven</i>                             | 1 | 1 |
| 460                                           | <i>Celtis pallida</i>                                                            | 1 | 1 |
| <b><i>Cervantesiaceae</i> + <i>others</i></b> |                                                                                  |   |   |
| 461                                           | <i>Acanthosyris falcata</i>                                                      | 2 | 2 |
| 462                                           | <i>Acanthosyris falcata</i> + <i>Aspidosperma quebracho-</i>                     | 1 | 1 |
| 463                                           | <i>Acanthosyris falcata</i> + <i>Copernicia alba</i>                             | 1 | 1 |
| 464                                           | <i>Acanthosyris falcata</i> + <i>Cordia americana</i> + <i>Aspidosperma</i>      | 1 | 1 |
| 465                                           | <i>Acanthosyris falcata</i> + <i>Prosopis kuntzei</i> + <i>Senegalia</i>         | 1 | 1 |
| 466                                           | <i>Acanthosyris falcata</i> + <i>Senegalia praecox</i> + <i>Aspidosperma</i>     | 1 | 1 |
| 467                                           | <i>Acanthosyris falcata</i> + <i>Tabebuia nodosa</i> + <i>Aspidosperma</i>       | 1 | 1 |
| <b><i>Cordia</i> + <i>others</i></b>          |                                                                                  |   |   |
| 468                                           | <i>Coccoloba tiliacea</i> + <i>Cordia americana</i> + <i>Diatenopteryx</i>       |   | 1 |
| 469                                           | <i>Cordia americana</i>                                                          | 1 | 1 |
| 470                                           | <i>Cordia americana</i> + <i>Acanthosyris falcata</i> + <i>Aspidosperma</i>      | 1 | 1 |
| 471                                           | <i>Cordia americana</i> + <i>Acanthosyris falcata</i> + <i>Libidibia</i>         | 1 | 1 |
| 472                                           | <i>Cordia americana</i> + <i>Allophylus edulis</i> + <i>Luehea divaricata</i>    | 1 | 1 |
| 473                                           | <i>Cordia americana</i> + <i>Anadenanthera colubrina</i>                         |   | 2 |
| 474                                           | <i>Cordia americana</i> + <i>Diatenopteryx sorbifolia</i> + <i>Muelleria</i>     | 1 | 1 |
| 475                                           | <i>Cordia americana</i> + <i>Enterolobium</i>                                    | 1 | 1 |
| 476                                           | <i>Cordia americana</i> + <i>Eugenia uniflora</i>                                | 1 | 1 |
| 477                                           | <i>Cordia americana</i> + <i>Eugenia uniflora</i> + <i>Helietta</i>              | 1 | 1 |
| 478                                           | <i>Cordia americana</i> + <i>Eugenia uniflora</i> + <i>Myracrodruon</i>          | 1 | 1 |
| 479                                           | <i>Cordia americana</i> + <i>Ficus luschnathiana</i> + <i>Aspidosperma</i>       | 1 | 1 |
| 480                                           | <i>Cordia americana</i> + <i>Gleditsia amorphoides</i>                           | 1 | 1 |
| 481                                           | <i>Cordia americana</i> + <i>Gleditsia amorphoides</i> + <i>Diplokeleba</i>      | 1 | 1 |
| 482                                           | <i>Cordia americana</i> + <i>Gleditsia amorphoides</i> + <i>Enterolobium</i>     | 1 | 1 |
| 483                                           | <i>Cordia americana</i> + <i>Gleditsia amorphoides</i> + <i>Erythrina</i>        | 1 | 1 |
| 484                                           | <i>Cordia americana</i> + <i>Gleditsia amorphoides</i> + <i>Schinopsis</i>       | 1 | 1 |
| 485                                           | <i>Cordia americana</i> + <i>Handroanthus</i>                                    | 1 | 1 |
| 486                                           | <i>Cordia americana</i> + <i>Libidibia paraguariensis</i> + <i>Pisonia</i>       | 1 | 1 |
| 487                                           | <i>Cordia americana</i> + <i>Libidibia paraguariensis</i> + <i>Pisonia</i>       | 1 | 1 |
| 488                                           | <i>Cordia americana</i> + <i>Luehea divaricata</i>                               | 1 | 1 |
| 489                                           | <i>Cordia americana</i> + <i>Luehea divaricata</i> + <i>Nectandra</i>            | 1 | 1 |

|                                |                                                                                 |   |     |
|--------------------------------|---------------------------------------------------------------------------------|---|-----|
| 490                            | <i>Cordia americana</i> + <i>Matayba elaeagnoides</i> + <i>Handroanthus</i>     | 1 | 1   |
| 491                            | <i>Cordia americana</i> + <i>Myrcianthes mato</i> + <i>Cupania vernalis</i>     |   | 1 1 |
| 492                            | <i>Cordia americana</i> + <i>Myrcianthes pungens</i> + <i>Ocotea puberula</i>   |   | 1 1 |
| 493                            | <i>Cordia americana</i> + <i>Myrcianthes pungens</i> + <i>Ruprechtia</i>        |   | 1 1 |
| 494                            | <i>Cordia americana</i> + <i>Nectandra</i>                                      | 1 | 1   |
| 495                            | <i>Cordia americana</i> + <i>Nectandra angustifolia</i> + <i>Chrysophyllum</i>  | 1 | 1   |
| 496                            | <i>Cordia americana</i> + <i>Nectandra angustifolia</i> + <i>Cupania</i>        | 1 | 1   |
| 497                            | <i>Cordia americana</i> + <i>Parapiptadenia rigida</i> + <i>Allophylus</i>      | 1 | 1   |
| 498                            | <i>Cordia americana</i> + <i>Phyllostylon rhamnoides</i>                        | 1 | 1   |
| 499                            | <i>Cordia americana</i> + <i>Phyllostylon rhamnoides</i> + <i>Sideroxylon</i>   | 1 | 1   |
| 500                            | <i>Cordia americana</i> + <i>Phytolacca dioica</i>                              | 1 | 1   |
| 501                            | <i>Cordia americana</i> + <i>Pisonia zapallo</i> + <i>Gleditsia</i>             | 1 | 1   |
| 502                            | <i>Cordia americana</i> + <i>Prunus brasiliensis</i>                            | 1 | 1   |
| 503                            | <i>Cordia americana</i> + <i>Ruprechtia apetala</i> + <i>Aspidosperma</i>       | 1 | 1   |
| 504                            | <i>Cordia americana</i> + <i>Ruprechtia laxiflora</i> + <i>Enterolobium</i>     | 1 | 1   |
| 505                            | <i>Cordia americana</i> + <i>Schinopsis balansae</i>                            | 1 | 1   |
| 506                            | <i>Cordia americana</i> + <i>Schinopsis balansae</i> + <i>Aspidosperma</i>      | 1 | 1   |
| 507                            | <i>Cordia americana</i> + <i>Schinopsis balansae</i> + <i>Gleditsia</i>         | 1 | 1   |
| 508                            | <i>Cordia americana</i> + <i>Schinopsis balansae</i> + <i>Prosopis nigra</i>    | 1 | 1   |
| 509                            | <i>Cordia americana</i> + <i>Senegalia praecox</i> + <i>Libidibia</i>           | 1 | 1   |
| 510                            | <i>Cordia americana</i> + <i>Senegalia praecox</i> + <i>Schinus longifolius</i> | 1 | 1   |
| 511                            | <i>Cordia americana</i> + <i>Senegalia praecox</i> + <i>Sideroxylon</i>         | 1 | 1   |
| 512                            | <i>Cordia americana</i> + <i>Senegalia praecox</i> + <i>Trichilia</i>           | 1 | 1   |
| 513                            | <i>Cordia americana</i> + <i>Trema micrantha</i>                                |   | 1 1 |
| 514                            | <i>Cordia americana</i> + <i>Trichilia catigua</i> + <i>Libidibia</i>           | 1 | 1   |
| 515                            | <i>Cordia trichotoma</i> + <i>Cordia americana</i> + <i>Ceiba</i>               |   | 1 1 |
| 516                            | <i>Cordia trichotoma</i> + <i>Parapiptadenia excelsa</i> + <i>Cedrela</i>       |   | 1 1 |
| 517                            | <i>Phytolacca dioica</i> + <i>Cordia americana</i> + <i>Helietta apiculata</i>  | 1 | 1   |
| 518                            | <i>Zanthoxylum rhoifolium</i> + <i>Pilocarpus pennatifolius</i> + <i>Cordia</i> | 1 | 1   |
| <b>Elaeocarpaceae + others</b> |                                                                                 |   |     |
| 519                            | <i>Crinodendron tucumanum</i>                                                   |   | 1 1 |
| <b>Euphorbiaceae + others</b>  |                                                                                 |   |     |
| 520                            | <i>Alchornea triplinervia</i> + <i>Didymopanax morototoni</i> + <i>Pisonia</i>  | 1 | 1   |
| 521                            | <i>Croton piluliferus</i> + <i>Handroanthus lapacho</i> + <i>Ocotea</i>         |   | 1 1 |
| 522                            | <i>Croton piluliferus</i> + <i>Ocotea puberula</i>                              |   | 1 1 |
| 523                            | <i>Croton urucurana</i>                                                         | 1 | 1   |
| 524                            | <i>Croton urucurana</i> + <i>Inga uraguensis</i>                                | 1 | 1   |
| 525                            | <i>Erythrina crista-galli</i> + <i>Sapium haematospermum</i>                    | 1 | 1   |
| 526                            | <i>Inga uraguensis</i> + <i>Sapium haematospermum</i>                           | 1 | 1   |
| 527                            | <i>Sapium glandulosum</i>                                                       | 1 | 1   |
| 528                            | <i>Sapium glandulosum</i> + <i>Celtis chichape</i>                              | 1 | 1   |
| 529                            | <i>Sapium haematospermum</i>                                                    | 1 | 2   |
| 530                            | <i>Sapium haematospermum</i> + <i>Bougainvillea stipitata</i> + <i>Albizia</i>  | 1 | 1   |
| 531                            | <i>Sapium haematospermum</i> + <i>Copernicia alba</i>                           | 1 | 1   |
| 532                            | <i>Sapium haematospermum</i> + <i>Enterolobium</i>                              | 1 | 1   |
| 533                            | <i>Sapium haematospermum</i> + <i>Myrcianthes pungens</i> + <i>Gleditsia</i>    | 1 | 1   |
| 534                            | <i>Sapium haematospermum</i> + <i>Salix humboldtiana</i>                        |   | 1 1 |
| 535                            | <i>Sapium haematospermum</i> + <i>Tabebuia nodosa</i>                           | 1 | 1   |
| 536                            | <i>Sapium haematospermum</i> + <i>Vachellia caven</i>                           | 2 | 2   |
| 537                            | <i>Sapium haematospermum</i> + <i>Vachellia caven</i> + <i>Chrysophyllum</i>    | 1 | 1   |
| 538                            | <i>Sapium haematospermum</i> + <i>Zanthoxylum coco</i>                          |   | 1 1 |
| 539                            | <i>Schinus meyeri</i> + <i>Zanthoxylum coco</i>                                 |   | 1 1 |
| 540                            | <i>Scutia buxifolia</i> + <i>Chrysophyllum marginatum</i> + <i>Celtis</i>       | 1 | 1   |
| 541                            | <i>Scutia buxifolia</i> + <i>Gleditsia amorphoides</i> + <i>Zanthoxylum</i>     | 1 | 1   |
| 542                            | <i>Scutia buxifolia</i> + <i>Myrcianthes cisplatensis</i> + <i>Geoffroea</i>    | 1 | 1   |
| 543                            | <i>Sebastiania brasiliensis</i> + <i>Celtis ehrenbergiana</i>                   | 1 | 1   |
| 544                            | <i>Sebastiania brasiliensis</i> + <i>Gleditsia amorphoides</i> + <i>Scutia</i>  | 2 | 2   |

|                                             |                                                                                   |   |   |   |
|---------------------------------------------|-----------------------------------------------------------------------------------|---|---|---|
| 545                                         | <i>Sebastiania brasiliensis</i> + <i>Salix humboldtiana</i>                       |   | 1 | 1 |
| 546                                         | <i>Sebastiania brasiliensis</i> + <i>Sebastiania commersoniana</i>                | 1 |   | 1 |
| 547                                         | <i>Sebastiania brasiliensis</i> + <i>Vachellia aroma</i>                          |   | 1 | 1 |
| 548                                         | <i>Sebastiania brasiliensis</i> + <i>Vachellia caven</i>                          | 1 |   | 1 |
| 549                                         | <i>Sebastiania commersoniana</i> + <i>Myrcianthes cisplatensis</i>                | 1 |   | 1 |
| 550                                         | <i>Sebastiania commersoniana</i> + <i>Myrcianthes</i>                             | 1 |   | 1 |
| 551                                         | <i>Sebastiania commersoniana</i> + <i>Phyllostylon</i>                            |   | 1 | 1 |
| 552                                         | <i>Sideroxylon obtusifolium</i> + <i>Achatocarpus praecox</i> + <i>Scutia</i>     | 1 |   | 1 |
| 553                                         | <i>Tetrorchidium rubrivenium</i> + <i>Didymopanax</i>                             |   | 1 | 1 |
| <b>Gonopterodendron sarmientoi + others</b> |                                                                                   |   |   |   |
| 554                                         | <i>Aspidosperma triternatum</i> + <i>Gonopterodendron sarmientoi</i>              |   | 1 | 1 |
| 555                                         | <i>Aspidosperma triternatum</i> + <i>Gonopterodendron</i>                         |   | 1 | 1 |
| 556                                         | <i>Gonopterodendron bonariensis</i> + <i>Prosopis ruscifolia</i>                  |   | 1 | 1 |
| 557                                         | <i>Gonopterodendron sarmientoi</i>                                                |   | 2 | 2 |
| 558                                         | <i>Gonopterodendron sarmientoi</i> + <i>Aspidosperma quebracho-</i>               |   | 6 | 6 |
| 559                                         | <i>Gonopterodendron sarmientoi</i> + <i>Aspidosperma quebracho-</i>               |   | 1 | 1 |
| 560                                         | <i>Gonopterodendron sarmientoi</i> + <i>Aspidosperma quebracho-</i>               |   | 3 | 3 |
| 561                                         | <i>Gonopterodendron sarmientoi</i> + <i>Aspidosperma quebracho-</i>               |   | 1 | 1 |
| 562                                         | <i>Gonopterodendron sarmientoi</i> + <i>Aspidosperma quebracho-</i>               |   | 1 | 1 |
| 563                                         | <i>Gonopterodendron sarmientoi</i> + <i>Aspidosperma quebracho-</i>               |   | 3 | 3 |
| 564                                         | <i>Gonopterodendron sarmientoi</i> + <i>Aspidosperma quebracho-</i>               |   | 2 | 2 |
| 565                                         | <i>Gonopterodendron sarmientoi</i> + <i>Aspidosperma quebracho-</i>               |   | 1 | 1 |
| 566                                         | <i>Gonopterodendron sarmientoi</i> + <i>Aspidosperma quebracho-</i>               |   | 1 | 1 |
| 567                                         | <i>Gonopterodendron sarmientoi</i> + <i>Aspidosperma quebracho-</i>               |   | 1 | 1 |
| 568                                         | <i>Gonopterodendron sarmientoi</i> + <i>Bougainvillea</i>                         |   | 1 | 1 |
| 569                                         | <i>Gonopterodendron sarmientoi</i> + <i>Bougainvillea</i>                         |   | 1 | 1 |
| 570                                         | <i>Gonopterodendron sarmientoi</i> + <i>Calycophyllum</i>                         |   | 1 | 1 |
| 571                                         | <i>Gonopterodendron sarmientoi</i> + <i>Chloroleucon</i>                          |   | 1 | 1 |
| 572                                         | <i>Gonopterodendron sarmientoi</i> + <i>Prosopis elata</i> + <i>Tabebuia</i>      |   | 1 | 1 |
| 573                                         | <i>Gonopterodendron sarmientoi</i> + <i>Prosopis ruscifolia</i>                   |   | 4 | 4 |
| 574                                         | <i>Gonopterodendron sarmientoi</i> + <i>Prosopis</i>                              |   | 1 | 1 |
| 575                                         | <i>Gonopterodendron sarmientoi</i> + <i>Salta triflora</i>                        |   | 5 | 5 |
| 576                                         | <i>Gonopterodendron sarmientoi</i> + <i>Salta</i>                                 |   | 3 | 3 |
| 577                                         | <i>Gonopterodendron sarmientoi</i> + <i>Salta</i>                                 |   | 1 | 1 |
| 578                                         | <i>Gonopterodendron sarmientoi</i> + <i>Salta triflora</i> + <i>Bougainvillea</i> |   | 2 | 2 |
| 579                                         | <i>Gonopterodendron sarmientoi</i> + <i>Salta triflora</i> + <i>Ceiba</i>         |   | 1 | 1 |
| 580                                         | <i>Gonopterodendron sarmientoi</i> + <i>Salta</i>                                 |   | 1 | 1 |
| 581                                         | <i>Gonopterodendron sarmientoi</i> + <i>Salta</i>                                 |   | 1 | 1 |
| 582                                         | <i>Gonopterodendron sarmientoi</i> + <i>Salta triflora</i> + <i>Schinopsis</i>    |   | 1 | 1 |
| 583                                         | <i>Gonopterodendron sarmientoi</i> + <i>Salta triflora</i> + <i>Schinopsis</i>    |   | 1 | 1 |
| 584                                         | <i>Gonopterodendron sarmientoi</i> + <i>Salta triflora</i> + <i>Tabebuia</i>      |   | 2 | 2 |
| 585                                         | <i>Gonopterodendron sarmientoi</i> + <i>Sarcomphalus mistol</i>                   |   | 3 | 3 |
| 586                                         | <i>Gonopterodendron sarmientoi</i> + <i>Sarcomphalus</i>                          |   | 1 | 1 |
| 587                                         | <i>Gonopterodendron sarmientoi</i> + <i>Sarcomphalus</i>                          |   | 1 | 1 |
| 588                                         | <i>Gonopterodendron sarmientoi</i> + <i>Sarcomphalus</i>                          |   | 1 | 1 |
| 589                                         | <i>Gonopterodendron sarmientoi</i> + <i>Sarcomphalus mistol</i> + <i>Salta</i>    |   | 1 | 1 |
| 590                                         | <i>Gonopterodendron sarmientoi</i> + <i>Sarcomphalus mistol</i> + <i>Salta</i>    |   | 1 | 1 |
| 591                                         | <i>Gonopterodendron sarmientoi</i> + <i>Sarcomphalus mistol</i> + <i>Salta</i>    |   | 1 | 1 |
| 592                                         | <i>Gonopterodendron sarmientoi</i> + <i>Sarcomphalus mistol</i> + <i>Salta</i>    |   | 1 | 1 |
| 593                                         | <i>Gonopterodendron sarmientoi</i> + <i>Sarcomphalus</i>                          |   | 1 | 1 |
| 594                                         | <i>Gonopterodendron sarmientoi</i> + <i>Sarcomphalus</i>                          |   | 1 | 1 |
| 595                                         | <i>Gonopterodendron sarmientoi</i> + <i>Sarcomphalus</i>                          |   | 1 | 1 |
| 596                                         | <i>Gonopterodendron sarmientoi</i> + <i>Sarcotoxikum salicifolium</i>             |   | 1 | 1 |
| 597                                         | <i>Gonopterodendron sarmientoi</i> + <i>Schinopsis</i>                            |   | 1 | 1 |
| 598                                         | <i>Gonopterodendron sarmientoi</i> + <i>Sideroxylon</i>                           |   | 1 | 1 |
| 599                                         | <i>Gonopterodendron sarmientoi</i> + <i>Sideroxylon</i>                           |   | 1 | 1 |
| 600                                         | <i>Gonopterodendron sarmientoi</i> + <i>Tabebuia nodosa</i>                       |   | 4 | 4 |

|                                           |                                                                                   |   |   |
|-------------------------------------------|-----------------------------------------------------------------------------------|---|---|
| 601                                       | <i>Gonopterodendron sarmientoi</i> + <i>Tabebuia</i>                              | 3 | 3 |
| 602                                       | <i>Gonopterodendron sarmientoi</i> + <i>Tabebuia nodosa</i> + <i>Ceiba</i>        | 1 | 1 |
| 603                                       | <i>Gonopterodendron sarmientoi</i> + <i>Tabebuia nodosa</i> + <i>Prosopis</i>     | 1 | 1 |
| 604                                       | <i>Gonopterodendron sarmientoi</i> + <i>Tabebuia nodosa</i> + <i>Salta</i>        | 1 | 1 |
| 605                                       | <i>Gonopterodendron sarmientoi</i> + <i>Tabebuia</i>                              | 1 | 1 |
| 606                                       | <i>Gonopterodendron sarmientoi</i> + <i>Tabebuia</i>                              | 1 | 1 |
| 607                                       | <i>Gonopterodendron sarmientoi</i> + <i>Tabebuia nodosa</i> + <i>Ximenia</i>      | 1 | 1 |
| <b><i>Helietta apiculata</i> + others</b> |                                                                                   |   |   |
| 608                                       | <i>Helietta apiculata</i> + <i>Albizia niopoides</i> + <i>Prunus brasiliensis</i> | 1 | 1 |
| 609                                       | <i>Helietta apiculata</i> + <i>Annona neosalicifolia</i> + <i>Myrocarpus</i>      | 1 | 1 |
| 610                                       | <i>Helietta apiculata</i> + <i>Cordia americana</i> + <i>Myrcianthes</i>          | 1 | 1 |
| 611                                       | <i>Helietta apiculata</i> + <i>Luehea divaricata</i> + <i>Zanthoxylum</i>         | 1 | 1 |
| 612                                       | <i>Helietta apiculata</i> + <i>Machaerium stipitatum</i> + <i>Diatenopteryx</i>   | 1 | 1 |
| 613                                       | <i>Helietta apiculata</i> + <i>Nectandra angustifolia</i> + <i>Cupania</i>        | 1 | 1 |
| <b><i>Lamiaceae</i> + others</b>          |                                                                                   |   |   |
| 614                                       | <i>Vitex megapotamica</i> + <i>Cordia americana</i> + <i>Muelleria</i>            | 1 | 1 |
| 615                                       | <i>Vitex megapotamica</i> + <i>Luehea divaricata</i>                              | 1 | 1 |
| 616                                       | <i>Vitex megapotamica</i> + <i>Muelleria campestris</i> + <i>Apuleia</i>          | 1 | 1 |
| 617                                       | <i>Vitex megapotamica</i> + <i>Prunus brasiliensis</i> + <i>Plinia rivularis</i>  | 1 | 1 |
| <b><i>Lauraceae</i> + others</b>          |                                                                                   |   |   |
| 618                                       | <i>Balfourodendron riedelianum</i> + <i>Ateleia</i>                               | 1 | 1 |
| 619                                       | <i>Balfourodendron riedelianum</i> + <i>Campomanesia</i>                          | 1 | 1 |
| 620                                       | <i>Balfourodendron riedelianum</i> + <i>Holocalyx balansae</i> + <i>Prunus</i>    | 1 | 1 |
| 621                                       | <i>Balfourodendron riedelianum</i> + <i>Nectandra</i>                             | 1 | 1 |
| 622                                       | <i>Eugenia burkartiana</i> + <i>Chrysophyllum</i>                                 | 1 | 1 |
| 623                                       | <i>Myrcianthes pungens</i> + <i>Holocalyx balansae</i> + <i>Sideroxylon</i>       | 1 | 1 |
| 624                                       | <i>Myrcianthes pungens</i> + <i>Luehea divaricata</i> + <i>Helietta</i>           | 1 | 1 |
| 625                                       | <i>Nectandra angustifolia</i> + <i>Albizia inundata</i>                           | 1 | 1 |
| 626                                       | <i>Nectandra angustifolia</i> + <i>Bastardiopsis densiflora</i>                   | 1 | 1 |
| 627                                       | <i>Nectandra angustifolia</i> + <i>Campomanesia</i>                               | 1 | 1 |
| 628                                       | <i>Nectandra angustifolia</i> + <i>Cedrela fissilis</i> + <i>Ocotea puberula</i>  | 1 | 1 |
| 629                                       | <i>Nectandra angustifolia</i> + <i>Chrysophyllum</i>                              | 1 | 1 |
| 630                                       | <i>Nectandra angustifolia</i> + <i>Cordia americana</i> + <i>Machura</i>          | 1 | 1 |
| 631                                       | <i>Nectandra angustifolia</i> + <i>Cordia americana</i> + <i>Muelleria</i>        | 1 | 1 |
| 632                                       | <i>Nectandra angustifolia</i> + <i>Croton urucurana</i> + <i>Albizia</i>          | 1 | 1 |
| 633                                       | <i>Nectandra angustifolia</i> + <i>Erythrina falcata</i> + <i>Allophylus</i>      | 1 | 1 |
| 634                                       | <i>Nectandra angustifolia</i> + <i>Erythrina falcata</i> + <i>Ocotea</i>          | 1 | 1 |
| 635                                       | <i>Nectandra angustifolia</i> + <i>Ficus luschnathiana</i> + <i>Cabralea</i>      | 1 | 1 |
| 636                                       | <i>Nectandra angustifolia</i> + <i>Holocalyx balansae</i> + <i>Cordia</i>         | 1 | 1 |
| 637                                       | <i>Nectandra angustifolia</i> + <i>Jacaratia spinosa</i> + <i>Pisonia zapallo</i> | 1 | 1 |
| 638                                       | <i>Nectandra angustifolia</i> + <i>Lonchocarpus</i>                               | 1 | 1 |
| 639                                       | <i>Nectandra angustifolia</i> + <i>Luehea divaricata</i> + <i>Jacaratia</i>       | 1 | 1 |
| 640                                       | <i>Nectandra angustifolia</i> + <i>Luehea divaricata</i> + <i>Muelleria</i>       | 1 | 1 |
| 641                                       | <i>Nectandra angustifolia</i> + <i>Machaerium stipitatum</i> + <i>Pilocarpus</i>  | 1 | 1 |
| 642                                       | <i>Nectandra angustifolia</i> + <i>Machaerium</i>                                 | 1 | 1 |
| 643                                       | <i>Nectandra angustifolia</i> + <i>Muelleria campestris</i> + <i>Cordia</i>       | 1 | 1 |
| 644                                       | <i>Nectandra angustifolia</i> + <i>Muelleria</i>                                  | 1 | 1 |
| 645                                       | <i>Nectandra angustifolia</i> + <i>Muelleria campestris</i> + <i>Ocotea</i>       | 1 | 1 |
| 646                                       | <i>Nectandra angustifolia</i> + <i>Myrocarpus frondosus</i> + <i>Holocalyx</i>    | 1 | 1 |
| 647                                       | <i>Nectandra angustifolia</i> + <i>Nectandra</i>                                  | 1 | 1 |
| 648                                       | <i>Nectandra angustifolia</i> + <i>Ocotea puberula</i> + <i>Picrasma</i>          | 1 | 1 |
| 649                                       | <i>Nectandra angustifolia</i> + <i>Parapiptadenia rigida</i> + <i>Luehea</i>      | 1 | 1 |
| 650                                       | <i>Nectandra angustifolia</i> + <i>Parapiptadenia</i>                             | 1 | 1 |
| 651                                       | <i>Nectandra angustifolia</i> + <i>Phytolacca dioica</i>                          | 1 | 1 |
| 652                                       | <i>Nectandra angustifolia</i> + <i>Ruprechtia</i>                                 | 1 | 1 |
| 653                                       | <i>Nectandra angustifolia</i> + <i>Syagrus</i>                                    | 1 | 1 |
| 654                                       | <i>Nectandra angustifolia</i> + <i>Zanthoxylum</i>                                | 1 | 1 |

|                                   |                                                                                    |   |   |   |
|-----------------------------------|------------------------------------------------------------------------------------|---|---|---|
| 655                               | <i>Nectandra cuspidata</i> + <i>Cedrela angustifolia</i> + <i>Myrsine</i>          |   | 1 | 1 |
| 656                               | <i>Nectandra lanceolata</i> + <i>Maclura tinctoria</i> + <i>Cabrlea</i>            | 1 |   | 1 |
| 657                               | <i>Nectandra lanceolata</i> + <i>Nectandra angustifolia</i> + <i>Guarea</i>        | 1 |   | 1 |
| 658                               | <i>Nectandra lanceolata</i> + <i>Ocotea puberula</i> + <i>Schinus</i>              | 1 |   | 1 |
| 659                               | <i>Ocotea acutifolia</i> + <i>Inga affinis</i>                                     | 1 |   | 1 |
| 660                               | <i>Ocotea porphyria</i>                                                            |   | 4 | 4 |
| 661                               | <i>Ocotea porphyria</i> + <i>Alnus acuminata</i> + <i>Cordia</i>                   |   | 1 | 1 |
| 662                               | <i>Ocotea porphyria</i> + <i>Chrysophyllum marginatum</i>                          |   | 1 | 1 |
| 663                               | <i>Ocotea porphyria</i> + <i>Cupania vernalis</i>                                  |   | 1 | 1 |
| 664                               | <i>Ocotea porphyria</i> + <i>Juglans australis</i> + <i>Erythroxylum</i>           |   | 1 | 1 |
| 665                               | <i>Ocotea porphyria</i> + <i>Myrcianthes pseudomato</i>                            |   | 1 | 1 |
| 666                               | <i>Ocotea porphyria</i> + <i>Myrcianthes pungens</i>                               |   | 1 | 1 |
| 667                               | <i>Ocotea porphyria</i> + <i>Parapiptadenia excelsa</i>                            |   | 1 | 1 |
| 668                               | <i>Ocotea porphyria</i> + <i>Pisonia zapallo</i> + <i>Anadenanthera</i>            |   | 1 | 1 |
| 669                               | <i>Ocotea porphyria</i> + <i>Tessaria integrifolia</i> + <i>Pisonia zapallo</i>    |   | 1 | 1 |
| 670                               | <i>Ocotea porphyria</i> + <i>Zanthoxylum coco</i> + <i>Erythrina falcata</i>       |   | 1 | 1 |
| 671                               | <i>Ocotea puberula</i> + <i>Cedrela balansae</i> + <i>Piper tucumanum</i>          |   | 1 | 1 |
| 672                               | <i>Ocotea puberula</i> + <i>Cedrela fissilis</i>                                   | 1 |   | 1 |
| 673                               | <i>Ocotea puberula</i> + <i>Cupania vernalis</i> + <i>Urera caracasana</i>         |   | 1 | 1 |
| 674                               | <i>Ocotea puberula</i> + <i>Guazuma ulmifolia</i> + <i>Cordia americana</i>        | 1 |   | 1 |
| 675                               | <i>Ocotea puberula</i> + <i>Juglans australis</i> + <i>Anadenanthera</i>           |   | 1 | 1 |
| 676                               | <i>Ocotea puberula</i> + <i>Machaerium paraguayense</i>                            | 1 |   | 1 |
| 677                               | <i>Ocotea puberula</i> + <i>Myrcianthes mato</i>                                   |   | 1 | 1 |
| 678                               | <i>Ocotea puberula</i> + <i>Myrcianthes pseudomato</i> + <i>Inga edulis</i>        |   | 1 | 1 |
| 679                               | <i>Ocotea puberula</i> + <i>Parapiptadenia excelsa</i> + <i>Croton</i>             |   | 1 | 1 |
| 680                               | <i>Pisonia zapallo</i> + <i>Ruprechtia laxiflora</i> + <i>Apuleia leiocarpa</i>    | 1 |   | 1 |
| 681                               | <i>Plinia rivularis</i> + <i>Parapiptadenia rigida</i> + <i>Helietta apiculata</i> | 1 |   | 1 |
| 682                               | <i>Ruprechtia laxiflora</i>                                                        | 1 |   | 1 |
| 683                               | <i>Ruprechtia laxiflora</i> + <i>Muelleria campestris</i> + <i>Erythrina</i>       | 1 |   | 1 |
| 684                               | <i>Urera caracasana</i> + <i>Ocotea porphyria</i> + <i>Inga marginata</i>          |   | 1 | 1 |
| <b>Luehea divaricata + others</b> |                                                                                    |   |   |   |
| 685                               | <i>Luehea divaricata</i> + <i>Ateleia glazioviana</i>                              | 1 |   | 1 |
| 686                               | <i>Luehea divaricata</i> + <i>Gleditsia amorphoides</i> + <i>Helietta</i>          | 1 |   | 1 |
| 687                               | <i>Luehea divaricata</i> + <i>Nectandra angustifolia</i> + <i>Vitex</i>            | 1 |   | 1 |
| 688                               | <i>Luehea divaricata</i> + <i>Nectandra lanceolata</i> + <i>Phytolacca</i>         | 1 |   | 1 |
| 689                               | <i>Luehea divaricata</i> + <i>Parapiptadenia rigida</i> + <i>Holocalyx</i>         | 1 |   | 1 |
| 690                               | <i>Luehea divaricata</i> + <i>Prunus brasiliensis</i> + <i>Albizia</i>             | 1 |   | 1 |
| 691                               | <i>Luehea divaricata</i> + <i>Ruprechtia laxiflora</i> + <i>Balfourodendron</i>    | 1 |   | 1 |
| 692                               | <i>Luehea divaricata</i> + <i>Sebastiania commersoniana</i> + <i>Annona</i>        | 1 |   | 1 |
| 693                               | <i>Luehea divaricata</i> + <i>Sebastiania commersoniana</i> + <i>Vitex</i>         | 1 |   | 1 |
| 694                               | <i>Zanthoxylum rhoifolium</i> + <i>Ilex brevicuspis</i> + <i>Luehea</i>            | 1 |   | 1 |
| <b>Meliaceae + others</b>         |                                                                                    |   |   |   |
| 695                               | <i>Cabrlea canjerana</i> + <i>Machaerium</i>                                       | 1 |   | 1 |
| 696                               | <i>Cabrlea canjerana</i> + <i>Tabernaemontana</i>                                  | 1 |   | 1 |
| 697                               | <i>Cedrela angustifolia</i> + <i>Juglans australis</i> + <i>Myrsine</i>            |   | 1 | 1 |
| 698                               | <i>Cedrela angustifolia</i> + <i>Parapiptadenia excelsa</i>                        |   | 1 | 1 |
| 699                               | <i>Cedrela angustifolia</i> + <i>Piper tucumanum</i> + <i>Ateleia</i>              |   | 1 | 1 |
| 700                               | <i>Cedrela balansae</i>                                                            |   | 1 | 1 |
| 701                               | <i>Cedrela balansae</i> + <i>Boehmeria caudata</i> + <i>Urera caracasana</i>       |   | 1 | 1 |
| 702                               | <i>Cedrela balansae</i> + <i>Cordia americana</i> + <i>Gleditsia</i>               |   | 1 | 1 |
| 703                               | <i>Cedrela balansae</i> + <i>Myrcianthes pseudomato</i>                            |   | 1 | 1 |
| 704                               | <i>Cedrela balansae</i> + <i>Myrcianthes pungens</i> + <i>Blepharocalyx</i>        |   | 1 | 1 |
| 705                               | <i>Cedrela balansae</i> + <i>Ocotea puberula</i> + <i>Cordia americana</i>         |   | 1 | 1 |
| 706                               | <i>Cedrela balansae</i> + <i>Pisonia zapallo</i> + <i>Myracrodruon</i>             |   | 1 | 1 |
| 707                               | <i>Cedrela fissilis</i> + <i>Syagrus romanzoffiana</i> + <i>Balfourodendron</i>    | 1 |   | 1 |
| 708                               | <i>Cedrela saltensis</i> + <i>Cedrela angustifolia</i>                             |   | 1 | 1 |
| 709                               | <i>Guarea kunthiana</i> + <i>Myrocarpus frondosus</i> + <i>Inga</i>                | 1 |   | 1 |



|                             |                                                                                   |   |    |    |
|-----------------------------|-----------------------------------------------------------------------------------|---|----|----|
| 710                         | <i>Trichilia catigua</i> + <i>Syagrus romanzoffiana</i> + <i>Cedrela fissilis</i> | 1 |    | 1  |
| 711                         | <i>Trichilia clausenii</i> + <i>Gleditsia</i>                                     |   | 1  | 1  |
| <b>Mimosoideae + others</b> |                                                                                   |   |    |    |
| 712                         | <i>Albizia inundata</i>                                                           | 1 |    | 1  |
| 713                         | <i>Albizia inundata</i> + <i>Diplokeleba floribunda</i> + <i>Microlobius</i>      | 1 |    | 1  |
| 714                         | <i>Albizia inundata</i> + <i>Sapium haematospermum</i> + <i>Prosopis nigra</i>    | 1 |    | 1  |
| 715                         | <i>Anadenanthera colubrina</i>                                                    | 2 | 10 | 12 |
| 716                         | <i>Anadenanthera colubrina</i> + <i>Athyana weinmanniifolia</i>                   | 1 |    | 1  |
| 717                         | <i>Anadenanthera colubrina</i> + <i>Calycophyllum multiflorum</i>                 |   | 2  | 2  |
| 718                         | <i>Anadenanthera colubrina</i> + <i>Carica quercifolia</i>                        |   | 1  | 1  |
| 719                         | <i>Anadenanthera colubrina</i> + <i>Carica quercifolia</i> + <i>Tipuana</i>       |   | 1  | 1  |
| 720                         | <i>Anadenanthera colubrina</i> + <i>Cedrela balansae</i>                          |   | 2  | 2  |
| 721                         | <i>Anadenanthera colubrina</i> + <i>Cedrela</i>                                   |   | 1  | 1  |
| 722                         | <i>Anadenanthera colubrina</i> + <i>Cedrela saltensis</i>                         |   | 1  | 1  |
| 723                         | <i>Anadenanthera colubrina</i> + <i>Ceiba chodatii</i> + <i>Calycophyllum</i>     |   | 2  | 2  |
| 724                         | <i>Anadenanthera colubrina</i> + <i>Ceiba chodatii</i> + <i>Phyllostylon</i>      |   | 1  | 1  |
| 725                         | <i>Anadenanthera colubrina</i> + <i>Celtis ehrenbergiana</i>                      |   | 1  | 1  |
| 726                         | <i>Anadenanthera colubrina</i> + <i>Cordia americana</i> + <i>Gleditsia</i>       |   | 1  | 1  |
| 727                         | <i>Anadenanthera colubrina</i> + <i>Cordia trichotoma</i> + <i>Myrcianthes</i>    |   | 1  | 1  |
| 728                         | <i>Anadenanthera colubrina</i> + <i>Coutarea hexandra</i>                         |   | 1  | 1  |
| 729                         | <i>Anadenanthera colubrina</i> + <i>Enterolobium</i>                              |   | 1  | 1  |
| 730                         | <i>Anadenanthera colubrina</i> + <i>Libidibia</i>                                 |   | 1  | 1  |
| 731                         | <i>Anadenanthera colubrina</i> + <i>Lonchocarpus lilloi</i> + <i>Ceiba</i>        |   | 1  | 1  |
| 732                         | <i>Anadenanthera colubrina</i> + <i>Lonchocarpus lilloi</i> + <i>Trichilia</i>    |   | 1  | 1  |
| 733                         | <i>Anadenanthera colubrina</i> + <i>Myracrodruon urundeuva</i>                    |   | 1  | 1  |
| 734                         | <i>Anadenanthera colubrina</i> + <i>Myracrodruon</i>                              |   | 1  | 1  |
| 735                         | <i>Anadenanthera colubrina</i> + <i>Myracrodruon</i>                              |   | 1  | 1  |
| 736                         | <i>Anadenanthera colubrina</i> + <i>Ocotea puberula</i>                           |   | 1  | 1  |
| 737                         | <i>Anadenanthera colubrina</i> + <i>Ocotea puberula</i> + <i>Diatenopteryx</i>    |   | 1  | 1  |
| 738                         | <i>Anadenanthera colubrina</i> + <i>Parapiptadenia excelsa</i>                    | 3 | 2  | 5  |
| 739                         | <i>Anadenanthera colubrina</i> + <i>Phyllostylon rhamnoides</i>                   |   | 2  | 2  |
| 740                         | <i>Anadenanthera colubrina</i> + <i>Phyllostylon</i>                              |   | 1  | 1  |
| 741                         | <i>Anadenanthera colubrina</i> + <i>Phyllostylon</i>                              |   | 1  | 1  |
| 742                         | <i>Anadenanthera colubrina</i> + <i>Pisonia zapallo</i> + <i>Phyllostylon</i>     |   | 1  | 1  |
| 743                         | <i>Anadenanthera colubrina</i> + <i>Pisonia zapallo</i> + <i>Phyllostylon</i>     |   | 1  | 1  |
| 744                         | <i>Anadenanthera colubrina</i> + <i>Pterogyne nitens</i>                          |   | 1  | 1  |
| 745                         | <i>Anadenanthera colubrina</i> + <i>Rhamnus sphaerosperma</i>                     |   | 1  | 1  |
| 746                         | <i>Anadenanthera colubrina</i> + <i>Ruprechtia apetala</i>                        | 2 |    | 2  |
| 747                         | <i>Anadenanthera colubrina</i> + <i>Ruprechtia apetala</i> + <i>Schinopsis</i>    | 1 |    | 1  |
| 748                         | <i>Anadenanthera colubrina</i> + <i>Salta triflora</i> + <i>Sarcomphalus</i>      | 1 |    | 1  |
| 749                         | <i>Anadenanthera colubrina</i> + <i>Schinopsis lorentzii</i>                      | 2 |    | 2  |
| 750                         | <i>Anadenanthera colubrina</i> + <i>Schinopsis lorentzii</i> + <i>Pisonia</i>     |   | 1  | 1  |
| 751                         | <i>Anadenanthera colubrina</i> + <i>Senegalia praecox</i> + <i>Ruprechtia</i>     | 1 |    | 1  |
| 752                         | <i>Anadenanthera colubrina</i> + <i>Solanum granulolum-leprosum</i>               |   | 1  | 1  |
| 753                         | <i>Anadenanthera colubrina</i> + <i>Terminalia triflora</i> + <i>Cordia</i>       |   | 1  | 1  |
| 754                         | <i>Anadenanthera colubrina</i> + <i>Tipuana tipu</i> + <i>Ceiba chodatii</i>      | 1 |    | 1  |
| 755                         | <i>Anadenanthera colubrina</i> + <i>Tipuana tipu</i> + <i>Ocotea</i>              |   | 1  | 1  |
| 756                         | <i>Bougainvillea campanulata</i> + <i>Vachellia caven</i>                         | 1 |    | 1  |
| 757                         | <i>Casearia sylvestris</i> + <i>Enterolobium contortisiliquum</i>                 | 1 |    | 1  |
| 758                         | <i>Ceiba chodatii</i> + <i>Anadenanthera colubrina</i> + <i>Parapiptadenia</i>    |   | 1  | 1  |
| 759                         | <i>Chloroleucon tenuiflorum</i> + <i>Myracrodruon urundeuva</i>                   |   | 1  | 1  |
| 760                         | <i>Cochlospermum tetraporum</i> + <i>Anadenanthera colubrina</i>                  |   | 1  | 1  |
| 761                         | <i>Enterolobium contortisiliquum</i>                                              | 3 |    | 3  |
| 762                         | <i>Enterolobium contortisiliquum</i> + <i>Annona neosalicifolia</i>               |   | 1  | 1  |
| 763                         | <i>Enterolobium contortisiliquum</i> + <i>Gleditsia amorphoides</i>               | 1 |    | 1  |
| 764                         | <i>Enterolobium contortisiliquum</i> + <i>Myracrodruon</i>                        | 1 |    | 1  |
| 765                         | <i>Enterolobium contortisiliquum</i> + <i>Ocotea</i>                              |   | 1  | 1  |

|     |                                                                                   |   |   |   |
|-----|-----------------------------------------------------------------------------------|---|---|---|
| 766 | <i>Enterolobium contortisiliquum</i> + <i>Zanthoxylum</i>                         |   | 1 | 1 |
| 767 | <i>Gleditsia amorphoides</i> + <i>Celtis iguanaea</i> + <i>Libidibia</i>          | 1 |   | 1 |
| 768 | <i>Gleditsia amorphoides</i> + <i>Cordia americana</i>                            | 2 |   | 2 |
| 769 | <i>Gleditsia amorphoides</i> + <i>Cordia americana</i> + <i>Handroanthus</i>      | 1 |   | 1 |
| 770 | <i>Gleditsia amorphoides</i> + <i>Cordia americana</i> + <i>Sideroxylon</i>       | 1 |   | 1 |
| 771 | <i>Gleditsia amorphoides</i> + <i>Diplokeleba</i>                                 | 1 |   | 1 |
| 772 | <i>Gleditsia amorphoides</i> + <i>Enterolobium</i>                                | 1 |   | 1 |
| 773 | <i>Gleditsia amorphoides</i> + <i>Enterolobium</i>                                | 1 |   | 1 |
| 774 | <i>Gleditsia amorphoides</i> + <i>Holocalyx</i>                                   | 1 |   | 1 |
| 775 | <i>Gleditsia amorphoides</i> + <i>Libidibia</i>                                   | 1 |   | 1 |
| 776 | <i>Gleditsia amorphoides</i> + <i>Myracrodruon</i>                                | 1 |   | 1 |
| 777 | <i>Gleditsia amorphoides</i> + <i>Myrsine coriacea</i> + <i>Tipuana tipu</i>      |   | 1 | 1 |
| 778 | <i>Gleditsia amorphoides</i> + <i>Phyllostylon rhamnoides</i> + <i>Pisonia</i>    | 1 |   | 1 |
| 779 | <i>Gleditsia amorphoides</i> + <i>Phyllostylon rhamnoides</i> + <i>Prosopis</i>   | 1 |   | 1 |
| 780 | <i>Gleditsia amorphoides</i> + <i>Pouteria glomerata</i> + <i>Nectandra</i>       | 1 |   | 1 |
| 781 | <i>Gleditsia amorphoides</i> + <i>Prosopis alba</i> + <i>Ruprechtia laxiflora</i> | 1 |   | 1 |
| 782 | <i>Gleditsia amorphoides</i> + <i>Ruprechtia laxiflora</i>                        | 1 |   | 1 |
| 783 | <i>Gleditsia amorphoides</i> + <i>Ruprechtia laxiflora</i> + <i>Phyllostylon</i>  | 1 |   | 1 |
| 784 | <i>Gleditsia amorphoides</i> + <i>Schinopsis balansae</i> + <i>Cordia</i>         | 1 |   | 1 |
| 785 | <i>Gleditsia amorphoides</i> + <i>Scutia buxifolia</i>                            | 1 |   | 1 |
| 786 | <i>Gleditsia amorphoides</i> + <i>Senegalia praecox</i> + <i>Aspidosperma</i>     | 1 |   | 1 |
| 787 | <i>Gleditsia amorphoides</i> + <i>Vachellia aroma</i> + <i>Phyllostylon</i>       | 1 |   | 1 |
| 788 | <i>Inga marginata</i> + <i>Luehea divaricata</i> + <i>Enterolobium</i>            |   | 1 | 1 |
| 789 | <i>Inga saltensis</i> + <i>Ocotea puberula</i>                                    |   | 1 | 1 |
| 790 | <i>Inga uraguensis</i>                                                            | 1 | 1 | 2 |
| 791 | <i>Lithraea molleoides</i> + <i>Enterolobium contortisiliquum</i>                 |   | 1 | 1 |
| 792 | <i>Microlobius foetidus</i> + <i>Copernicia alba</i> + <i>Phoradendron</i>        | 1 |   | 1 |
| 793 | <i>Mimosa bimucronata</i>                                                         | 1 |   | 1 |
| 794 | <i>Mimozgyanthus carinatus</i>                                                    | 4 |   | 4 |
| 795 | <i>Mimozgyanthus carinatus</i> + <i>Aspidosperma quebracho-blanco</i>             | 1 |   | 1 |
| 796 | <i>Mimozgyanthus carinatus</i> + <i>Aspidosperma quebracho-</i>                   | 1 |   | 1 |
| 797 | <i>Mimozgyanthus carinatus</i> + <i>Prosopis flexuosa</i>                         | 1 |   | 1 |
| 798 | <i>Mimozgyanthus carinatus</i> + <i>Salta triflora</i>                            | 1 |   | 1 |
| 799 | <i>Mimozgyanthus carinatus</i> + <i>Sarcomphalus mistol</i>                       | 1 |   | 1 |
| 800 | <i>Mimozgyanthus carinatus</i> + <i>Sarcomphalus</i>                              | 2 |   | 2 |
| 801 | <i>Mimozgyanthus carinatus</i> + <i>Sarcomphalus</i>                              | 1 |   | 1 |
| 802 | <i>Mimozgyanthus carinatus</i> + <i>Tabebuia nodosa</i>                           | 1 |   | 1 |
| 803 | <i>Myroxylon peruiferum</i> + <i>Anadenanthera colubrina</i>                      |   | 1 | 1 |
| 804 | <i>Parapiptadenia excelsa</i>                                                     | 1 | 2 | 3 |
| 805 | <i>Parapiptadenia excelsa</i> + <i>Anadenanthera colubrina</i>                    | 1 | 2 | 3 |
| 806 | <i>Parapiptadenia excelsa</i> + <i>Anadenanthera colubrina</i> + <i>Cordia</i>    |   | 1 | 1 |
| 807 | <i>Parapiptadenia excelsa</i> + <i>Anadenanthera</i>                              |   | 1 | 1 |
| 808 | <i>Parapiptadenia excelsa</i> + <i>Anadenanthera colubrina</i> + <i>Pisonia</i>   |   | 1 | 1 |
| 809 | <i>Parapiptadenia excelsa</i> + <i>Anadenanthera</i>                              |   | 1 | 1 |
| 810 | <i>Parapiptadenia excelsa</i> + <i>Blepharocalyx</i>                              | 1 |   | 1 |
| 811 | <i>Parapiptadenia excelsa</i> + <i>Enterolobium</i>                               |   | 1 | 1 |
| 812 | <i>Parapiptadenia excelsa</i> + <i>Gleditsia amorphoides</i>                      |   | 1 | 1 |
| 813 | <i>Parapiptadenia excelsa</i> + <i>Myrcianthes cisplatensis</i>                   | 1 |   | 1 |
| 814 | <i>Parapiptadenia excelsa</i> + <i>Myrcianthes mato</i> + <i>Ceiba chodatii</i>   |   | 1 | 1 |
| 815 | <i>Parapiptadenia excelsa</i> + <i>Myrcianthes pungens</i>                        |   | 1 | 1 |
| 816 | <i>Parapiptadenia excelsa</i> + <i>Myrcianthes pungens</i> + <i>Schinopsis</i>    |   | 1 | 1 |
| 817 | <i>Parapiptadenia excelsa</i> + <i>Myroxylon</i>                                  |   | 1 | 1 |
| 818 | <i>Parapiptadenia excelsa</i> + <i>Pisonia zapallo</i> + <i>Ruprechtia</i>        |   | 1 | 1 |
| 819 | <i>Parapiptadenia excelsa</i> + <i>Ruprechtia apetala</i> + <i>Celtis</i>         | 1 |   | 1 |
| 820 | <i>Parapiptadenia excelsa</i> + <i>Schinopsis lorentzii</i>                       |   | 1 | 1 |
| 821 | <i>Parapiptadenia excelsa</i> + <i>Tipuana tipu</i>                               |   | 1 | 1 |
| 822 | <i>Parapiptadenia rigida</i> + <i>Machaerium stipitatum</i> + <i>Gleditsia</i>    |   | 1 | 1 |

|     |                                                                                   |   |   |
|-----|-----------------------------------------------------------------------------------|---|---|
| 823 | <i>Parapiptadenia rigida</i> + <i>Nectandra angustifolia</i> + <i>Muelleria</i>   | 1 | 1 |
| 824 | <i>Parasenegalia visco</i>                                                        | 1 | 1 |
| 825 | <i>Parasenegalia visco</i> + <i>Libidibia paraguariensis</i> + <i>Celtis</i>      | 1 | 1 |
| 826 | <i>Rauvolfia schuelii</i> + <i>Bougainvillea stipitata</i> + <i>Anadenanthera</i> |   | 1 |
| 827 | <i>Ruprechtia apetala</i> + <i>Senegalia praecox</i> + <i>Celtis</i>              | 1 | 1 |
| 828 | <i>Ruprechtia laxiflora</i> + <i>Anadenanthera</i>                                |   | 1 |
| 829 | <i>Sebastiania commersoniana</i> + <i>Vachellia caven</i>                         | 1 | 1 |
| 830 | <i>Senegalia fiebrigii</i> + <i>Tabebuia nodosa</i> + <i>Aspidosperma</i>         | 1 | 1 |
| 831 | <i>Senegalia gilliesii</i>                                                        | 1 | 1 |
| 832 | <i>Senegalia gilliesii</i> + <i>Aspidosperma quebracho-blanco</i>                 | 1 | 1 |
| 833 | <i>Senegalia gilliesii</i> + <i>Aspidosperma quebracho-</i>                       | 1 | 1 |
| 834 | <i>Senegalia gilliesii</i> + <i>Parkinsonia praecox</i>                           | 2 | 2 |
| 835 | <i>Senegalia gilliesii</i> + <i>Prosopis nigra</i>                                | 1 | 1 |
| 836 | <i>Senegalia gilliesii</i> + <i>Sarcomphalus mistol</i> + <i>Aspidosperma</i>     | 1 | 1 |
| 837 | <i>Senegalia gilliesii</i> + <i>Senegalia praecox</i>                             | 1 | 1 |
| 838 | <i>Senegalia gilliesii</i> + <i>Vachellia caven</i> + <i>Ruprechtia</i>           | 1 | 1 |
| 839 | <i>Senegalia praecox</i>                                                          | 1 | 1 |
| 840 | <i>Senegalia praecox</i> + <i>Achatocarpus praecox</i>                            | 1 | 1 |
| 841 | <i>Senegalia praecox</i> + <i>Achatocarpus praecox</i> + <i>Cordia</i>            | 1 | 1 |
| 842 | <i>Senegalia praecox</i> + <i>Aspidosperma quebracho-blanco</i>                   | 4 | 4 |
| 843 | <i>Senegalia praecox</i> + <i>Aspidosperma quebracho-</i>                         | 1 | 1 |
| 844 | <i>Senegalia praecox</i> + <i>Aspidosperma quebracho-</i>                         | 1 | 1 |
| 845 | <i>Senegalia praecox</i> + <i>Aspidosperma quebracho-</i>                         | 2 | 2 |
| 846 | <i>Senegalia praecox</i> + <i>Aspidosperma quebracho-</i>                         | 1 | 1 |
| 847 | <i>Senegalia praecox</i> + <i>Celtis chichape</i> + <i>Sarcomphalus mistol</i>    | 1 | 1 |
| 848 | <i>Senegalia praecox</i> + <i>Celtis ehrenbergiana</i>                            | 1 | 1 |
| 849 | <i>Senegalia praecox</i> + <i>Celtis iguanaea</i>                                 | 1 | 1 |
| 850 | <i>Senegalia praecox</i> + <i>Cordia americana</i>                                | 1 | 1 |
| 851 | <i>Senegalia praecox</i> + <i>Cordia americana</i> + <i>Prosopis kuntzei</i>      | 1 | 1 |
| 852 | <i>Senegalia praecox</i> + <i>Cordia americana</i> + <i>Schinopsis balansae</i>   | 1 | 1 |
| 853 | <i>Senegalia praecox</i> + <i>Cordia americana</i> + <i>Sideroxylon</i>           | 1 | 1 |
| 854 | <i>Senegalia praecox</i> + <i>Cordia americana</i> + <i>Sideroxylon</i>           | 1 | 1 |
| 855 | <i>Senegalia praecox</i> + <i>Eugenia uniflora</i> + <i>Cordia</i>                | 1 | 1 |
| 856 | <i>Senegalia praecox</i> + <i>Geoffroea decorticans</i>                           | 1 | 1 |
| 857 | <i>Senegalia praecox</i> + <i>Gleditsia amorphoides</i> + <i>Libidibia</i>        | 1 | 1 |
| 858 | <i>Senegalia praecox</i> + <i>Libidibia paraguariensis</i>                        | 1 | 1 |
| 859 | <i>Senegalia praecox</i> + <i>Libidibia</i>                                       | 1 | 1 |
| 860 | <i>Senegalia praecox</i> + <i>Pisonia zapallo</i> + <i>Libidibia</i>              | 1 | 1 |
| 861 | <i>Senegalia praecox</i> + <i>Prosopis alba</i>                                   | 2 | 2 |
| 862 | <i>Senegalia praecox</i> + <i>Prosopis alba</i> + <i>Ruprechtia</i>               | 1 | 1 |
| 863 | <i>Senegalia praecox</i> + <i>Prosopis kuntzei</i>                                | 2 | 2 |
| 864 | <i>Senegalia praecox</i> + <i>Prosopis kuntzei</i> + <i>Aspidosperma</i>          | 2 | 2 |
| 865 | <i>Senegalia praecox</i> + <i>Prosopis kuntzei</i> + <i>Schinopsis lorentzii</i>  | 1 | 1 |
| 866 | <i>Senegalia praecox</i> + <i>Prosopis nigra</i>                                  | 2 | 2 |
| 867 | <i>Senegalia praecox</i> + <i>Prosopis nigra</i> + <i>Aspidosperma</i>            | 1 | 1 |
| 868 | <i>Senegalia praecox</i> + <i>Prosopis nigra</i> + <i>Schinopsis</i>              | 1 | 1 |
| 869 | <i>Senegalia praecox</i> + <i>Ruprechtia apetala</i>                              |   | 1 |
| 870 | <i>Senegalia praecox</i> + <i>Ruprechtia laxiflora</i> + <i>Aspidosperma</i>      | 1 | 1 |
| 871 | <i>Senegalia praecox</i> + <i>Ruprechtia laxiflora</i> + <i>Sarcomphalus</i>      | 1 | 1 |
| 872 | <i>Senegalia praecox</i> + <i>Ruprechtia laxiflora</i> + <i>Schinus</i>           | 1 | 1 |
| 873 | <i>Senegalia praecox</i> + <i>Salta triflora</i>                                  | 1 | 1 |
| 874 | <i>Senegalia praecox</i> + <i>Sarcomphalus mistol</i>                             | 1 | 1 |
| 875 | <i>Senegalia praecox</i> + <i>Sarcomphalus mistol</i> + <i>Aspidosperma</i>       | 1 | 1 |
| 876 | <i>Senegalia praecox</i> + <i>Sarcomphalus mistol</i> + <i>Prosopis kuntzei</i>   | 1 | 1 |
| 877 | <i>Senegalia praecox</i> + <i>Sarcomphalus mistol</i> + <i>Schinus</i>            | 1 | 1 |
| 878 | <i>Senegalia praecox</i> + <i>Schinopsis balansae</i>                             | 3 | 3 |
| 879 | <i>Senegalia praecox</i> + <i>Schinopsis balansae</i> + <i>Prosopis nigra</i>     | 1 | 1 |

|                          |                                                                                    |   |    |   |   |    |
|--------------------------|------------------------------------------------------------------------------------|---|----|---|---|----|
| 880                      | <i>Senegalia praecox</i> + <i>Schinopsis lorentzii</i> + <i>Aspidosperma</i>       |   |    | 2 |   | 2  |
| 881                      | <i>Senegalia praecox</i> + <i>Schinopsis lorentzii</i> + <i>Jodina rhombifolia</i> |   |    | 1 |   | 1  |
| 882                      | <i>Senegalia praecox</i> + <i>Schinus fasciculatus</i> + <i>Prosopis</i>           |   |    | 1 |   | 1  |
| 883                      | <i>Senegalia praecox</i> + <i>Schinus longifolius</i>                              |   |    | 1 |   | 1  |
| 884                      | <i>Senegalia praecox</i> + <i>Sideroxylon obtusifolium</i> + <i>Diplokeleba</i>    |   |    | 1 |   | 1  |
| 885                      | <i>Senegalia praecox</i> + <i>Tabebuia nodosa</i>                                  |   |    | 1 |   | 1  |
| 886                      | <i>Senegalia praecox</i> + <i>Trithrinax campestris</i> + <i>Maytenus vitis-</i>   |   |    | 1 |   | 1  |
| 887                      | <i>Senegalia praecox</i> + <i>Vachellia aroma</i>                                  |   |    | 1 |   | 1  |
| 888                      | <i>Tabernaemontana catharinensis</i> + <i>Enterolobium</i>                         |   |    | 1 |   | 1  |
| 889                      | <i>Vachelia caven</i> + <i>Prosopis</i>                                            | 1 |    |   |   | 1  |
| 890                      | <i>Vachelia caven</i> + <i>Geoffroea decorticans</i>                               | 2 |    |   |   | 2  |
| 891                      | <i>Vachelia caven</i> + <i>Ruprechtia laxiflora</i>                                | 1 |    |   |   | 1  |
| 892                      | <i>Vachellia albicorticata</i>                                                     |   |    | 1 |   | 1  |
| 893                      | <i>Vachellia aroma</i>                                                             |   |    | 3 | 2 | 5  |
| 894                      | <i>Vachellia aroma</i> + <i>Celtis ehrenbergiana</i> + <i>Sarcomphalus</i>         |   |    | 1 |   | 1  |
| 895                      | <i>Vachellia aroma</i> + <i>Geoffroea decorticans</i>                              |   |    | 1 |   | 1  |
| 896                      | <i>Vachellia aroma</i> + <i>Parkinsonia praecox</i> + <i>Sarcomphalus</i>          |   |    | 1 |   | 1  |
| 897                      | <i>Vachellia aroma</i> + <i>Prosopis kuntzei</i>                                   |   |    | 1 |   | 1  |
| 898                      | <i>Vachellia aroma</i> + <i>Prosopis nigra</i>                                     |   |    | 1 |   | 1  |
| 899                      | <i>Vachellia aroma</i> + <i>Prosopis nigra</i> + <i>Schinopsis lorentzii</i>       |   |    | 1 |   | 1  |
| 900                      | <i>Vachellia aroma</i> + <i>Sarcomphalus mistol</i>                                |   |    | 2 |   | 2  |
| 901                      | <i>Vachellia aroma</i> + <i>Sarcomphalus mistol</i> + <i>Prosopis nigra</i>        |   |    | 2 |   | 2  |
| 902                      | <i>Vachellia aroma</i> + <i>Sarcomphalus mistol</i> + <i>Pterogyne nitens</i>      |   |    | 1 |   | 1  |
| 903                      | <i>Vachellia aroma</i> + <i>Scutia buxifolia</i>                                   |   |    | 1 |   | 1  |
| 904                      | <i>Vachellia aroma</i> + <i>Senegalia gilliesii</i> + <i>Aspidosperma</i>          |   |    | 1 |   | 1  |
| 905                      | <i>Vachellia aroma</i> + <i>Vachellia caven</i>                                    |   |    | 1 |   | 1  |
| 906                      | <i>Vachellia astringens</i>                                                        |   |    | 1 |   | 1  |
| 907                      | <i>Vachellia astringens</i> + <i>Aspidosperma quebracho-</i>                       |   |    | 1 |   | 1  |
| 908                      | <i>Vachellia astringens</i> + <i>Cordia sacculia</i>                               |   |    |   | 1 | 1  |
| 909                      | <i>Vachellia astringens</i> + <i>Prosopis alba</i> + <i>Vachellia aroma</i>        |   |    | 1 |   | 1  |
| 910                      | <i>Vachellia caven</i>                                                             | 1 | 14 | 9 | 1 | 25 |
| 911                      | <i>Vachellia caven</i> + <i>Aspidosperma quebracho-blanco</i>                      |   |    | 2 |   | 2  |
| 912                      | <i>Vachellia caven</i> + <i>Celtis ehrenbergiana</i>                               |   | 2  |   |   | 2  |
| 913                      | <i>Vachellia caven</i> + <i>Celtis ehrenbergiana</i> + <i>Condalia buxifolia</i>   |   |    | 1 |   | 1  |
| 914                      | <i>Vachellia caven</i> + <i>Celtis ehrenbergiana</i> + <i>Prosopis flexuosa</i>    |   |    | 1 |   | 1  |
| 915                      | <i>Vachellia caven</i> + <i>Condalia microphylla</i>                               |   |    | 1 |   | 1  |
| 916                      | <i>Vachellia caven</i> + <i>Geoffroea decorticans</i>                              |   | 2  |   |   | 2  |
| 917                      | <i>Vachellia caven</i> + <i>Lithraea molleoides</i>                                |   |    | 3 |   | 3  |
| 918                      | <i>Vachellia caven</i> + <i>Myrcianthes cisplatensis</i>                           |   | 1  |   |   | 1  |
| 919                      | <i>Vachellia caven</i> + <i>Myrcianthes cisplatensis</i> + <i>Scutia buxifolia</i> |   | 1  |   |   | 1  |
| 920                      | <i>Vachellia caven</i> + <i>Prosopis affinis</i>                                   |   | 5  |   |   | 5  |
| 921                      | <i>Vachellia caven</i> + <i>Prosopis affinis</i> + <i>Prosopis nigra</i>           |   | 1  |   |   | 1  |
| 922                      | <i>Vachellia caven</i> + <i>Prosopis nigra</i>                                     |   | 1  | 1 |   | 2  |
| 923                      | <i>Vachellia caven</i> + <i>Prosopis nigra</i> + <i>Geoffroea decorticans</i>      |   | 1  |   |   | 1  |
| 924                      | <i>Vachellia caven</i> + <i>Prosopis nigra</i> + <i>Schinus</i>                    |   | 1  |   |   | 1  |
| 925                      | <i>Vachellia caven</i> + <i>Sapium haematospermum</i>                              |   | 1  |   |   | 1  |
| 926                      | <i>Vachellia caven</i> + <i>Sarcomphalus mistol</i> + <i>Pterogyne</i>             |   |    | 1 |   | 1  |
| 927                      | <i>Vachellia caven</i> + <i>Schinus gracilipes</i>                                 |   |    | 1 |   | 1  |
| 928                      | <i>Vachellia caven</i> + <i>Schinus longifolius</i>                                |   | 1  |   |   | 1  |
| 929                      | <i>Vachellia caven</i> + <i>Schinus longifolius</i> + <i>Myrcianthes</i>           |   | 1  |   |   | 1  |
| 930                      | <i>Vachellia caven</i> + <i>Tabebuia nodosa</i>                                    |   |    | 2 |   | 2  |
| 931                      | <i>Vachellia caven</i> + <i>Zanthoxylum petiolare</i> + <i>Schinus</i>             |   |    | 1 |   | 1  |
| 932                      | <i>Vallesia glabra</i> + <i>Prosopis alba</i>                                      |   |    | 1 |   | 1  |
| <b>Moraceae + others</b> |                                                                                    |   |    |   |   |    |
| 933                      | <i>Ficus luschnathiana</i> + <i>Nectandra angustifolia</i> + <i>Luehea</i>         |   |    | 1 |   | 1  |
| 934                      | <i>Ficus luschnathiana</i> + <i>Ruprechtia laxiflora</i> + <i>Myrcianthes</i>      |   |    | 1 |   | 1  |
| 935                      | <i>Ficus luschnathiana</i> + <i>Schinopsis balansae</i> + <i>Achatocarpus</i>      |   |    | 1 |   | 1  |

|                           |                                                                                   |   |   |   |
|---------------------------|-----------------------------------------------------------------------------------|---|---|---|
| 936                       | <i>Ficus maroma</i> + <i>Terminalia triflora</i> + <i>Cedrela</i>                 |   | 1 | 1 |
| 937                       | <i>Ficus maroma</i> + <i>Tipuana tipu</i> + <i>Cordia trichotoma</i>              |   | 1 | 1 |
| 938                       | <i>Maclura tinctoria</i>                                                          |   | 1 | 1 |
| 939                       | <i>Maclura tinctoria</i> + <i>Handroanthus</i>                                    |   | 1 | 1 |
| 940                       | <i>Maclura tinctoria</i> + <i>Pisonia zapallo</i> + <i>Prosopis alba</i>          | 1 |   | 1 |
| 941                       | <i>Maclura tinctoria</i> + <i>Sideroxylon obtusifolium</i> + <i>Diplokeleba</i>   | 1 |   | 1 |
| 942                       | <i>Morus insignis</i>                                                             | 1 |   | 1 |
| 943                       | <i>Morus insignis</i> + <i>Solanum riparium</i>                                   | 1 |   | 1 |
| <b>Myrtaceae + others</b> |                                                                                   |   |   |   |
| 944                       | <i>Blepharocalyx salicifolius</i> + <i>Allophylus edulis</i>                      |   | 2 | 2 |
| 945                       | <i>Blepharocalyx salicifolius</i> + <i>Myrcianthes mato</i>                       |   | 1 | 1 |
| 946                       | <i>Blepharocalyx salicifolius</i> + <i>Parapiptadenia</i>                         |   | 1 | 1 |
| 947                       | <i>Boehmeria caudata</i> + <i>Pisonia zapallo</i> + <i>Ocotea puberula</i>        |   | 1 | 1 |
| 948                       | <i>Condalia buxifolia</i> + <i>Blepharocalyx salicifolius</i>                     |   | 1 | 1 |
| 949                       | <i>Eugenia mattosii</i> + <i>Blepharocalyx salicifolius</i>                       |   | 1 | 1 |
| 950                       | <i>Eugenia myrcianthes</i> + <i>Handroanthus heptaphyllus</i> + <i>Sorocea</i>    | 1 |   | 1 |
| 951                       | <i>Eugenia myrcianthes</i> + <i>Sebastiania commersoniana</i>                     | 1 |   | 1 |
| 952                       | <i>Eugenia speciosa</i> + <i>Ruprechtia laxiflora</i> + <i>Guazuma</i>            | 1 |   | 1 |
| 953                       | <i>Eugenia uniflora</i> + <i>Condalia buxifolia</i>                               |   | 1 | 1 |
| 954                       | <i>Eugenia uniflora</i> + <i>Ruprechtia laxiflora</i> + <i>Cordia americana</i>   | 1 |   | 1 |
| 955                       | <i>Eugenia uniflora</i> + <i>Schinopsis balansae</i> + <i>Myrcianthes</i>         | 1 |   | 1 |
| 956                       | <i>Gomidesia barituensis</i> + <i>Ilex argentina</i> + <i>Siphoneugena</i>        |   | 1 | 1 |
| 957                       | <i>Ilex argentina</i> + <i>Myrcianthes mato</i> + <i>Juglans</i>                  |   | 1 | 1 |
| 958                       | <i>Juglans australis</i> + <i>Allophylus edulis</i>                               |   | 1 | 1 |
| 959                       | <i>Juglans australis</i> + <i>Cedrela angustifolia</i>                            |   | 1 | 1 |
| 960                       | <i>Juglans australis</i> + <i>Handroanthus lapacho</i>                            |   | 1 | 1 |
| 961                       | <i>Juglans australis</i> + <i>Ilex argentina</i> + <i>Podocarpus</i>              |   | 1 | 1 |
| 962                       | <i>Juglans australis</i> + <i>Juglans regia</i>                                   |   | 1 | 1 |
| 963                       | <i>Juglans australis</i> + <i>Myrcianthes cisplatensis</i> + <i>Blepharocalyx</i> | 1 |   | 1 |
| 964                       | <i>Juglans australis</i> + <i>Myrcianthes pungens</i> + <i>Podocarpus</i>         |   | 1 | 1 |
| 965                       | <i>Juglans australis</i> + <i>Myroxylon peruiferum</i> + <i>Podocarpus</i>        |   | 1 | 1 |
| 966                       | <i>Myrcianthes cisplatensis</i>                                                   | 1 |   | 1 |
| 967                       | <i>Myrcianthes cisplatensis</i> + <i>Phyllostylon</i>                             | 1 |   | 1 |
| 968                       | <i>Myrcianthes cisplatensis</i> + <i>Prosopis affinis</i>                         | 1 |   | 1 |
| 969                       | <i>Myrcianthes cisplatensis</i> + <i>Prosopis nigra</i>                           | 2 | 1 | 3 |
| 970                       | <i>Myrcianthes cisplatensis</i> + <i>Prosopis nigra</i> + <i>Sideroxylon</i>      | 1 |   | 1 |
| 971                       | <i>Myrcianthes cisplatensis</i> + <i>Ruprechtia laxiflora</i> + <i>Nectandra</i>  | 1 |   | 1 |
| 972                       | <i>Myrcianthes cisplatensis</i> + <i>Sebastiania commersoniana</i>                | 1 |   | 1 |
| 973                       | <i>Myrcianthes cisplatensis</i> + <i>Senegalia praecox</i> + <i>Tabebuia</i>      |   | 1 | 1 |
| 974                       | <i>Myrcianthes cisplatensis</i> + <i>Vachellia caven</i> + <i>Celtis</i>          | 1 |   | 1 |
| 975                       | <i>Myrcianthes cisplatensis</i> + <i>Zanthoxylum fagara</i>                       | 1 |   | 1 |
| 976                       | <i>Myrcianthes mato</i> + <i>Celtis iguanaea</i> + <i>Handroanthus</i>            |   | 1 | 1 |
| 977                       | <i>Myrcianthes pungens</i>                                                        | 1 |   | 1 |
| 978                       | <i>Myrcianthes pungens</i> + <i>Anadenanthera colubrina</i>                       |   | 1 | 1 |
| 979                       | <i>Myrcianthes pungens</i> + <i>Citharexylum</i>                                  |   | 1 | 1 |
| 980                       | <i>Myrcianthes pungens</i> + <i>Cupania vernalis</i> + <i>Diatenopteryx</i>       |   | 1 | 1 |
| 981                       | <i>Myrcianthes pungens</i> + <i>Juglans australis</i> + <i>Podocarpus</i>         |   | 1 | 1 |
| 982                       | <i>Myrcianthes pungens</i> + <i>Ocotea porphyria</i> + <i>Gleditsia</i>           |   | 1 | 1 |
| 983                       | <i>Myrcianthes pungens</i> + <i>Ocotea puberula</i>                               |   | 1 | 1 |
| 984                       | <i>Myrcianthes pungens</i> + <i>Ruprechtia laxiflora</i> + <i>Urera</i>           |   | 1 | 1 |
| 985                       | <i>Myrcianthes pungens</i> + <i>Scutia buxifolia</i>                              | 1 |   | 1 |
| 986                       | <i>Myrcianthes pungens</i> + <i>Scutia buxifolia</i> + <i>Ceiba chodatii</i>      |   | 1 | 1 |
| 987                       | <i>Myrsine laetevirens</i> + <i>Parapiptadenia excelsa</i> + <i>Juglans</i>       |   | 1 | 1 |
| 988                       | <i>Phytolacca dioica</i> + <i>Eugenia uniflora</i>                                |   | 1 | 1 |
| 989                       | <i>Pouteria salicifolia</i> + <i>Eugenia myrcianthes</i>                          | 1 |   | 1 |
| 990                       | <i>Rhamnus sphaerosperma</i> + <i>Cedrela</i>                                     |   | 1 | 1 |
| 991                       | <i>Rhamnus sphaerosperma</i> + <i>Ocotea</i>                                      |   | 1 | 1 |

|                                       |                                                                                     |     |    |     |
|---------------------------------------|-------------------------------------------------------------------------------------|-----|----|-----|
| 992                                   | <i>Ruprechtia laxiflora</i> + <i>Blepharocalyx salicifolius</i> + <i>Vassobia</i>   |     | 1  | 1   |
| 993                                   | <i>Scutia buxifolia</i>                                                             |     | 1  | 1   |
| 994                                   | <i>Scutia buxifolia</i> + <i>Anadenanthera colubrina</i>                            |     | 1  | 1   |
| 995                                   | <i>Scutia buxifolia</i> + <i>Myrcianthes cisplatensis</i> + <i>Prosopis affinis</i> | 1   |    | 1   |
| 996                                   | <i>Scutia buxifolia</i> + <i>Myrcianthes cisplatensis</i> + <i>Prosopis nigra</i>   | 1   |    | 1   |
| 997                                   | <i>Siphoneugena occidentalis</i> + <i>Cedrela angustifolia</i> + <i>Luehea</i>      |     | 1  | 1   |
| 998                                   | <i>Sorocea sprucei</i> + <i>Myrsine laetevirens</i> + <i>Myrcianthes</i>            |     | 1  | 1   |
| 999                                   | <i>Urera baccifera</i> + <i>Handroanthus</i>                                        |     | 1  | 1   |
| 1000                                  | <i>Zanthoxylum rhoifolium</i> + <i>Phytolacca dioica</i> + <i>Myrsine</i>           | 1   |    | 1   |
| <b>Nothofagus antarctica + others</b> |                                                                                     |     |    |     |
| 1001                                  | <i>Araucaria araucana</i>                                                           | 1   |    | 1   |
| 1002                                  | <i>Maytenus boaria</i> + <i>Lomatia hirsuta</i>                                     | 1   |    | 1   |
| 1003                                  | <i>Nothofagus alpina</i>                                                            | 1   |    | 1   |
| 1004                                  | <i>Nothofagus antarctica</i>                                                        | 46  |    | 46  |
| 1005                                  | <i>Nothofagus antarctica</i> + <i>Araucaria araucana</i>                            | 1   |    | 1   |
| 1006                                  | <i>Nothofagus antarctica</i> + <i>Austrocedrus chilensis</i>                        | 1   |    | 1   |
| 1007                                  | <i>Nothofagus antarctica</i> + <i>Embothrium coccineum</i>                          | 1   |    | 1   |
| 1008                                  | <i>Nothofagus antarctica</i> + <i>Lomatia hirsuta</i>                               | 2   |    | 2   |
| <b>Nothofagus betuloides + others</b> |                                                                                     |     |    |     |
| 1009                                  | <i>Nothofagus betuloides</i>                                                        | 8   |    | 8   |
| 1010                                  | <i>Nothofagus betuloides</i> + <i>Nothofagus pumilio</i>                            | 2   |    | 2   |
| <b>Nothofagus dombeyi + others</b>    |                                                                                     |     |    |     |
| 1011                                  | <i>Lomatia hirsuta</i>                                                              | 2   |    | 2   |
| 1012                                  | <i>Nothofagus alpina</i> + <i>Nothofagus dombeyi</i>                                | 1   |    | 1   |
| 1013                                  | <i>Nothofagus dombeyi</i>                                                           | 16  |    | 16  |
| 1014                                  | <i>Nothofagus dombeyi</i> + <i>Austrocedrus chilensis</i>                           | 2   |    | 2   |
| 1015                                  | <i>Nothofagus dombeyi</i> + <i>Lomatia hirsuta</i>                                  | 1   |    | 1   |
| 1016                                  | <i>Nothofagus dombeyi</i> + <i>Maytenus boaria</i> + <i>Lomatia hirsuta</i>         | 1   |    | 1   |
| 1017                                  | <i>Nothofagus dombeyi</i> + <i>Nothofagus pumilio</i>                               | 1   |    | 1   |
| <b>Nothofagus pumilio + others</b>    |                                                                                     |     |    |     |
| 1018                                  | <i>Araucaria araucana</i> + <i>Nothofagus pumilio</i>                               | 1   |    | 1   |
| 1019                                  | <i>Nothofagus alpina</i> + <i>Nothofagus pumilio</i>                                | 1   |    | 1   |
| 1020                                  | <i>Nothofagus pumilio</i>                                                           | 129 |    | 129 |
| 1021                                  | <i>Nothofagus pumilio</i> + <i>Araucaria araucana</i>                               | 2   |    | 2   |
| 1022                                  | <i>Nothofagus pumilio</i> + <i>Nothofagus antarctica</i>                            | 2   |    | 2   |
| <b>Palmera + others</b>               |                                                                                     |     |    |     |
| 1023                                  | <i>Butia yatay</i>                                                                  |     | 1  | 1   |
| 1024                                  | <i>Casearia sylvestris</i> + <i>Syagrus romanzoffiana</i> + <i>Machaerium</i>       |     | 1  | 1   |
| 1025                                  | <i>Copernicia alba</i>                                                              | 2   | 50 | 52  |
| 1026                                  | <i>Copernicia alba</i> + <i>Aspidosperma quebracho-</i>                             |     | 1  | 1   |
| 1027                                  | <i>Copernicia alba</i> + <i>Celtis ehrenbergiana</i>                                |     | 1  | 1   |
| 1028                                  | <i>Copernicia alba</i> + <i>Chrysophyllum marginatum</i> + <i>Gleditsia</i>         |     | 1  | 1   |
| 1029                                  | <i>Copernicia alba</i> + <i>Cynophalla retusa</i> + <i>Prosopis ruscifolia</i>      |     | 1  | 1   |
| 1030                                  | <i>Copernicia alba</i> + <i>Diplokeleba floribunda</i> + <i>Schinopsis</i>          |     | 1  | 1   |
| 1031                                  | <i>Copernicia alba</i> + <i>Enterolobium contortisiliquum</i>                       |     | 1  | 1   |
| 1032                                  | <i>Copernicia alba</i> + <i>Prosopis affinis</i>                                    |     | 1  | 1   |
| 1033                                  | <i>Copernicia alba</i> + <i>Prosopis affinis</i> + <i>Prosopis nigra</i>            |     | 1  | 1   |
| 1034                                  | <i>Copernicia alba</i> + <i>Prosopis alba</i> + <i>Tabebuia nodosa</i>              |     | 1  | 1   |
| 1035                                  | <i>Copernicia alba</i> + <i>Prosopis nigra</i>                                      |     | 7  | 7   |
| 1036                                  | <i>Copernicia alba</i> + <i>Prosopis nigra</i> + <i>Schinopsis balansae</i>         |     | 1  | 1   |
| 1037                                  | <i>Copernicia alba</i> + <i>Prosopis nigra</i> + <i>Sideroxylon obtusifolium</i>    |     | 1  | 1   |
| 1038                                  | <i>Copernicia alba</i> + <i>Prosopis nigra</i> + <i>Tabebuia nodosa</i>             |     | 1  | 1   |
| 1039                                  | <i>Copernicia alba</i> + <i>Prosopis ruscifolia</i>                                 |     | 1  | 1   |
| 1040                                  | <i>Copernicia alba</i> + <i>Prosopis ruscifolia</i> + <i>Cynophalla retusa</i>      |     | 1  | 1   |
| 1041                                  | <i>Copernicia alba</i> + <i>Sarcomphalus mistol</i> + <i>Cynophalla retusa</i>      |     | 1  | 1   |
| 1042                                  | <i>Copernicia alba</i> + <i>Tabebuia nodosa</i>                                     |     | 6  | 6   |
| 1043                                  | <i>Copernicia alba</i> + <i>Tabebuia nodosa</i> + <i>Prosopis nigra</i>             |     | 1  | 1   |

|                                         |                                                                                   |   |   |
|-----------------------------------------|-----------------------------------------------------------------------------------|---|---|
| 1044                                    | <i>Copernicia alba</i> + <i>Tabebuia nodosa</i> + <i>Sarcomphalus mistol</i>      | 1 | 1 |
| 1045                                    | <i>Copernicia alba</i> + <i>Tabebuia nodosa</i> + <i>Trithrinax schizophylla</i>  | 1 | 1 |
| 1046                                    | <i>Euterpe edulis</i> + <i>Peltophorum dubium</i> + <i>Jacaratia spinosa</i>      | 1 | 1 |
| 1047                                    | <i>Syagrus romanzoffiana</i> + <i>Diatenopteryx</i>                               | 1 | 1 |
| 1048                                    | <i>Syagrus romanzoffiana</i> + <i>Myrcianthes</i>                                 | 1 | 1 |
| 1049                                    | <i>Trithrinax campestris</i> + <i>Geoffroea decorticans</i>                       | 1 | 1 |
| 1050                                    | <i>Trithrinax campestris</i> + <i>Prosopis affinis</i>                            | 1 | 1 |
| 1051                                    | <i>Trithrinax campestris</i> + <i>Prosopis affinis</i> + <i>Aspidosperma</i>      | 1 | 1 |
| 1052                                    | <i>Trithrinax campestris</i> + <i>Prosopis kuntzei</i> + <i>Sarcomphalus</i>      | 1 | 1 |
| 1053                                    | <i>Trithrinax campestris</i> + <i>Prosopis nigra</i>                              | 4 | 4 |
| 1054                                    | <i>Trithrinax campestris</i> + <i>Senegalia praecox</i> + <i>Aspidosperma</i>     | 1 | 1 |
| 1055                                    | <i>Trithrinax campestris</i> + <i>Senegalia praecox</i> + <i>Schinopsis</i>       | 1 | 1 |
| 1056                                    | <i>Trithrinax campestris</i> + <i>Sideroxylon obtusifolium</i>                    | 1 | 1 |
| 1057                                    | <i>Trithrinax campestris</i> + <i>Vachellia caven</i>                             | 1 | 1 |
| 1058                                    | <i>Trithrinax campestris</i> + <i>Vachellia caven</i> + <i>Prosopis nigra</i>     | 1 | 1 |
| 1059                                    | <i>Trithrinax schizophylla</i> var. <i>biflabellata</i>                           | 1 | 1 |
| 1060                                    | <i>Trithrinax schizophylla</i> var. <i>biflabellata</i> + <i>Salta</i>            | 1 | 1 |
| 1061                                    | <i>Trithrinax schizophylla</i> var. <i>biflabellata</i> + <i>Sarcomphalus</i>     | 1 | 1 |
| 1062                                    | <i>Trithrinax schizophylla</i> var. <i>biflabellata</i> + <i>Sarcomphalus</i>     | 1 | 1 |
| 1063                                    | <i>Trithrinax schizophylla</i> var. <i>biflabellata</i> + <i>Schinopsis</i>       | 1 | 1 |
| 1064                                    | <i>Trithrinax schizophylla</i> var. <i>schizophylla</i> + <i>Prosopis nigra</i>   | 1 | 1 |
| 1065                                    | <i>Trithrinax schizophylla</i> var. <i>schizophylla</i> + <i>Sarcomphalus</i>     | 1 | 1 |
| 1066                                    | <i>Trithrinax schizophylla</i> var. <i>schizophylla</i> + <i>Sarcomphalus</i>     | 1 | 1 |
| 1067                                    | <i>Trithrinax schizophylla</i> var. <i>schizophylla</i> + <i>Sarcomphalus</i>     | 1 | 1 |
| <b>Papilionoideae + others</b>          |                                                                                   |   |   |
| 1068                                    | <i>Aspidosperma polyneuron</i> + <i>Muelleria</i>                                 | 1 | 1 |
| 1069                                    | <i>Ateleia glazioveana</i>                                                        | 1 | 1 |
| 1070                                    | <i>Ateleia glazioveana</i> + <i>Bougainvillea stipitata</i> + <i>Achatocarpus</i> | 1 | 1 |
| 1071                                    | <i>Ateleia glazioveana</i> + <i>Ocotea puberula</i> + <i>Casearia decandra</i>    | 1 | 1 |
| 1072                                    | <i>Erythrina falcata</i> + <i>Enterolobium contortisiliquum</i> + <i>Matayba</i>  | 1 | 1 |
| 1073                                    | <i>Erythrina falcata</i> + <i>Muelleria campestris</i>                            | 1 | 1 |
| 1074                                    | <i>Machaerium stipitatum</i> + <i>Bastardiopsis</i>                               | 1 | 1 |
| 1075                                    | <i>Machaerium stipitatum</i> + <i>Citronella paniculata</i> + <i>Gleditsia</i>    | 1 | 1 |
| 1076                                    | <i>Machaerium stipitatum</i> + <i>Nectandra angustifolia</i> + <i>Muelleria</i>   | 1 | 1 |
| 1077                                    | <i>Machaerium stipitatum</i> + <i>Nectandra angustifolia</i> + <i>Muelleria</i>   | 1 | 1 |
| 1078                                    | <i>Muelleria campestris</i> + <i>Apuleia leiocarpa</i> + <i>Plinia rivularis</i>  | 1 | 1 |
| 1079                                    | <i>Muelleria campestris</i> + <i>Cordia americana</i> + <i>Luehea divaricata</i>  | 1 | 1 |
| 1080                                    | <i>Muelleria campestris</i> + <i>Luehea divaricata</i> + <i>Nectandra</i>         | 1 | 1 |
| 1081                                    | <i>Muelleria campestris</i> + <i>Nectandra angustifolia</i> + <i>Prunus</i>       | 1 | 1 |
| 1082                                    | <i>Muelleria campestris</i> + <i>Syagrus romanzoffiana</i>                        | 1 | 1 |
| 1083                                    | <i>Sebastiania commersoniana</i> + <i>Muelleria</i>                               | 1 | 1 |
| 1084                                    | <i>Tipuana tipu</i>                                                               |   | 1 |
| 1085                                    | <i>Tipuana tipu</i> + <i>Acanthosyris falcata</i> + <i>Copernicia</i>             | 1 | 1 |
| 1086                                    | <i>Tipuana tipu</i> + <i>Anadenanthera colubrina</i> + <i>Parasenegalia</i>       |   | 1 |
| <b>Phyllostylon rhamnoides + others</b> |                                                                                   |   |   |
| 1087                                    | <i>Aspidosperma quebracho-blanco</i> + <i>Phyllostylon</i>                        |   | 1 |
| 1088                                    | <i>Heliocarpus popayanensis</i> + <i>Phyllostylon</i>                             |   | 1 |
| 1089                                    | <i>Myracrodruon urundeuva</i> + <i>Phyllostylon</i>                               |   | 1 |
| 1090                                    | <i>Phyllostylon rhamnoides</i>                                                    | 1 | 1 |
| 1091                                    | <i>Phyllostylon rhamnoides</i> + <i>Anadenanthera colubrina</i>                   |   | 5 |
| 1092                                    | <i>Phyllostylon rhamnoides</i> + <i>Anadenanthera</i>                             |   | 1 |
| 1093                                    | <i>Phyllostylon rhamnoides</i> + <i>Anadenanthera</i>                             |   | 1 |
| 1094                                    | <i>Phyllostylon rhamnoides</i> + <i>Anadenanthera</i>                             |   | 1 |
| 1095                                    | <i>Phyllostylon rhamnoides</i> + <i>Calycophyllum</i>                             |   | 1 |
| 1096                                    | <i>Phyllostylon rhamnoides</i> + <i>Cedrela balansae</i> + <i>Pisonia</i>         |   | 1 |
| 1097                                    | <i>Phyllostylon rhamnoides</i> + <i>Ceiba chodatii</i>                            |   | 1 |
| 1098                                    | <i>Phyllostylon rhamnoides</i> + <i>Celtis ehrenbergiana</i> + <i>Cordia</i>      | 1 | 1 |

|                                               |                                                                                    |   |   |
|-----------------------------------------------|------------------------------------------------------------------------------------|---|---|
| 1099                                          | <i>Phyllostylon rhamnoides</i> + <i>Cordia americana</i> + <i>Gleditsia</i>        | 1 | 1 |
| 1100                                          | <i>Phyllostylon rhamnoides</i> + <i>Cordia americana</i> + <i>Gleditsia</i>        | 1 | 1 |
| 1101                                          | <i>Phyllostylon rhamnoides</i> + <i>Cordia americana</i> + <i>Senegalia</i>        |   | 1 |
| 1102                                          | <i>Phyllostylon rhamnoides</i> + <i>Eugenia punicifolia</i> + <i>Pisonia</i>       | 1 | 1 |
| 1103                                          | <i>Phyllostylon rhamnoides</i> + <i>Gleditsia amorphoides</i> + <i>Condalia</i>    |   | 1 |
| 1104                                          | <i>Phyllostylon rhamnoides</i> + <i>Gleditsia</i>                                  | 1 | 1 |
| 1105                                          | <i>Phyllostylon rhamnoides</i> + <i>Gleditsia</i>                                  | 1 | 1 |
| 1106                                          | <i>Phyllostylon rhamnoides</i> + <i>Gleditsia amorphoides</i> + <i>Scutia</i>      | 1 | 1 |
| 1107                                          | <i>Phyllostylon rhamnoides</i> + <i>Handroanthus</i>                               |   | 1 |
| 1108                                          | <i>Phyllostylon rhamnoides</i> + <i>Holocalyx balansae</i> + <i>Ficus</i>          | 1 | 1 |
| 1109                                          | <i>Phyllostylon rhamnoides</i> + <i>Libidibia</i>                                  | 1 | 1 |
| 1110                                          | <i>Phyllostylon rhamnoides</i> + <i>Myracrodruon balansae</i> + <i>Cordia</i>      | 1 | 1 |
| 1111                                          | <i>Phyllostylon rhamnoides</i> + <i>Myracrodruon</i>                               | 1 | 1 |
| 1112                                          | <i>Phyllostylon rhamnoides</i> + <i>Myrcianthes pungens</i> + <i>Eugenia</i>       |   | 1 |
| 1113                                          | <i>Phyllostylon rhamnoides</i> + <i>Parapiptadenia</i>                             |   | 1 |
| 1114                                          | <i>Phyllostylon rhamnoides</i> + <i>Pisonia zapallo</i> + <i>Libidibia</i>         |   | 1 |
| 1115                                          | <i>Phyllostylon rhamnoides</i> + <i>Pisonia zapallo</i> + <i>Senegalia</i>         | 1 | 1 |
| 1116                                          | <i>Phyllostylon rhamnoides</i> + <i>Ruprechtia laxiflora</i> + <i>Cordia</i>       | 1 | 1 |
| 1117                                          | <i>Phyllostylon rhamnoides</i> + <i>Salta triflora</i> + <i>Senegalia praecox</i>  | 1 | 1 |
| 1118                                          | <i>Phyllostylon rhamnoides</i> + <i>Senegalia praecox</i> + <i>Salta</i>           | 1 | 1 |
| 1119                                          | <i>Phyllostylon rhamnoides</i> + <i>Sideroxylon obtusifolium</i> + <i>Ceiba</i>    | 1 | 1 |
| <b><i>Pisonia zapallo</i> + others</b>        |                                                                                    |   |   |
| 1120                                          | <i>Pisonia zapallo</i>                                                             | 1 | 1 |
| 1121                                          | <i>Pisonia zapallo</i> + <i>Albizia inundata</i>                                   | 1 | 1 |
| 1122                                          | <i>Pisonia zapallo</i> + <i>Aspidosperma quebracho-</i>                            | 1 | 1 |
| 1123                                          | <i>Pisonia zapallo</i> + <i>Aspidosperma quebracho-blanco</i> + <i>Ceiba</i>       | 1 | 1 |
| 1124                                          | <i>Pisonia zapallo</i> + <i>Cordia americana</i> + <i>Gleditsia</i>                | 1 | 1 |
| 1125                                          | <i>Pisonia zapallo</i> + <i>Cordia americana</i> + <i>Ruprechtia laxiflora</i>     | 1 | 1 |
| 1126                                          | <i>Pisonia zapallo</i> + <i>Eugenia uniflora</i> + <i>Parapiptadenia excelsa</i>   |   | 1 |
| 1127                                          | <i>Pisonia zapallo</i> + <i>Gleditsia amorphoides</i> + <i>Handroanthus</i>        | 1 | 1 |
| 1128                                          | <i>Pisonia zapallo</i> + <i>Myroxylon peruiferum</i> + <i>Terminalia triflora</i>  |   | 1 |
| 1129                                          | <i>Pisonia zapallo</i> + <i>Ocotea porphyria</i> + <i>Juglans australis</i>        |   | 1 |
| 1130                                          | <i>Pisonia zapallo</i> + <i>Parapiptadenia excelsa</i> + <i>Erythroxylum</i>       |   | 1 |
| 1131                                          | <i>Pisonia zapallo</i> + <i>Phyllostylon rhamnoides</i>                            |   | 1 |
| 1132                                          | <i>Pisonia zapallo</i> + <i>Phyllostylon rhamnoides</i> + <i>Zanthoxylum</i>       |   | 1 |
| 1133                                          | <i>Pisonia zapallo</i> + <i>Prosopis kuntzei</i>                                   | 1 | 1 |
| 1134                                          | <i>Pisonia zapallo</i> + <i>Salta triflora</i> + <i>Sarcomphalus mistol</i>        | 1 | 1 |
| 1135                                          | <i>Pisonia zapallo</i> + <i>Sarcomphalus mistol</i> + <i>Cynophalla</i>            | 1 | 1 |
| 1136                                          | <i>Pisonia zapallo</i> + <i>Sarcomphalus mistol</i> + <i>Salta triflora</i>        | 1 | 1 |
| 1137                                          | <i>Pisonia zapallo</i> + <i>Schinopsis balansae</i> + <i>Prosopis nigra</i>        | 1 | 1 |
| 1138                                          | <i>Pisonia zapallo</i> + <i>Schinopsis lorentzii</i> + <i>Parapiptadenia</i>       |   | 1 |
| 1139                                          | <i>Pisonia zapallo</i> + <i>Senegalia praecox</i> + <i>Prosopis alba</i>           | 1 | 1 |
| 1140                                          | <i>Pisonia zapallo</i> + <i>Senegalia praecox</i> + <i>Prosopis</i>                | 1 | 1 |
| 1141                                          | <i>Pisonia zapallo</i> + <i>Senegalia praecox</i> + <i>Schinopsis lorentzii</i>    | 1 | 1 |
| 1142                                          | <i>Pisonia zapallo</i> + <i>Sideroxylon obtusifolium</i> + <i>Cynophalla</i>       | 1 | 1 |
| 1143                                          | <i>Pisonia zapallo</i> + <i>Tabebuia nodosa</i> + <i>Senegalia praecox</i>         | 1 | 1 |
| <b><i>Podocarpus parlatoresi</i> + others</b> |                                                                                    |   |   |
| 1144                                          | <i>Podocarpus parlatoresi</i>                                                      |   | 7 |
| 1145                                          | <i>Podocarpus parlatoresi</i> + <i>Azara salicifolia</i> + <i>Cedrela balansae</i> |   | 1 |
| 1146                                          | <i>Podocarpus parlatoresi</i> + <i>Blepharocalyx salicifolius</i>                  |   | 1 |
| 1147                                          | <i>Podocarpus parlatoresi</i> + <i>Juglans australis</i>                           |   | 1 |
| 1148                                          | <i>Podocarpus parlatoresi</i> + <i>Juglans australis</i> + <i>Eugenia</i>          |   | 1 |
| 1149                                          | <i>Podocarpus parlatoresi</i> + <i>Juglans australis</i> + <i>Myrcianthes</i>      |   | 1 |
| 1150                                          | <i>Podocarpus parlatoresi</i> + <i>Myrrhinium atropurpureum</i>                    |   | 1 |
| 1151                                          | <i>Podocarpus parlatoresi</i> + <i>Schinus myrtifolius</i> + <i>Schinus</i>        |   | 1 |
| 1152                                          | <i>Prunus tucumanensis</i> + <i>Podocarpus parlatoresi</i>                         |   | 1 |
| <b><i>Polygonaceae</i> + others</b>           |                                                                                    |   |   |



|      |                                                                                    |   |     |
|------|------------------------------------------------------------------------------------|---|-----|
| 1153 | <i>Bougainvillea praecox</i> + <i>Salta triflora</i> + <i>Celtis chichape</i>      | 1 | 1   |
| 1154 | <i>Kageneckia lanceolata</i> + <i>Blepharocalyx</i>                                | 1 | 1   |
| 1155 | <i>Libidibia paraguariensis</i> + <i>Schinus piliferus</i> + <i>Salta triflora</i> |   | 1 1 |
| 1156 | <i>Maytenus vitis-idaea</i> + <i>Ruprechtia apetala</i> + <i>Senegalia</i>         | 1 | 1   |
| 1157 | <i>Ruprechtia apetala</i> + <i>Anadenanthera colubrina</i>                         |   | 1 1 |
| 1158 | <i>Ruprechtia apetala</i> + <i>Aspidosperma quebracho-</i>                         | 1 | 1   |
| 1159 | <i>Ruprechtia apetala</i> + <i>Aspidosperma quebracho-</i>                         | 1 | 1   |
| 1160 | <i>Ruprechtia apetala</i> + <i>Cedrela balansae</i> + <i>Cordia americana</i>      |   | 1 1 |
| 1161 | <i>Ruprechtia apetala</i> + <i>Celtis ehrenbergiana</i> + <i>Vachellia caven</i>   | 1 | 1   |
| 1162 | <i>Ruprechtia apetala</i> + <i>Geoffroea decorticans</i> + <i>Gleditsia</i>        |   | 1 1 |
| 1163 | <i>Ruprechtia apetala</i> + <i>Lycium cestroides</i> + <i>Aspidosperma</i>         | 1 | 1   |
| 1164 | <i>Ruprechtia apetala</i> + <i>Myracrodruon urundeuva</i>                          |   | 1 1 |
| 1165 | <i>Ruprechtia apetala</i> + <i>Parapiptadenia excelsa</i> + <i>Celtis</i>          |   | 1 1 |
| 1166 | <i>Ruprechtia apetala</i> + <i>Prosopis alba</i> + <i>Allophylus</i>               | 1 | 1   |
| 1167 | <i>Ruprechtia apetala</i> + <i>Sarcomphalus mistol</i> + <i>Tabebuia</i>           | 1 | 1   |
| 1168 | <i>Ruprechtia apetala</i> + <i>Schinopsis lorentzii</i>                            | 1 | 1   |
| 1169 | <i>Ruprechtia apetala</i> + <i>Senegalia praecox</i> + <i>Schinopsis lorentzii</i> | 1 | 1   |
| 1170 | <i>Ruprechtia laxiflora</i> + <i>Achatocarpus praecox</i> + <i>Libidibia</i>       | 1 | 1   |
| 1171 | <i>Ruprechtia laxiflora</i> + <i>Celtis ehrenbergiana</i>                          | 1 | 1   |
| 1172 | <i>Ruprechtia laxiflora</i> + <i>Cordia americana</i>                              | 1 | 1   |
| 1173 | <i>Ruprechtia laxiflora</i> + <i>Cordia americana</i> + <i>Aspidosperma</i>        | 1 | 1   |
| 1174 | <i>Ruprechtia laxiflora</i> + <i>Cordia americana</i> + <i>Libidibia</i>           | 1 | 1   |
| 1175 | <i>Ruprechtia laxiflora</i> + <i>Cordia americana</i> + <i>Myrcianthes</i>         | 1 | 1   |
| 1176 | <i>Ruprechtia laxiflora</i> + <i>Eugenia uniflora</i> + <i>Celtis</i>              | 1 | 1   |
| 1177 | <i>Ruprechtia laxiflora</i> + <i>Geoffroea decorticans</i> + <i>Tabebuia</i>       | 1 | 1   |
| 1178 | <i>Ruprechtia laxiflora</i> + <i>Gleditsia amorphoides</i>                         | 1 | 1   |
| 1179 | <i>Ruprechtia laxiflora</i> + <i>Gleditsia amorphoides</i> + <i>Diplokeleba</i>    | 1 | 1   |
| 1180 | <i>Ruprechtia laxiflora</i> + <i>Gleditsia amorphoides</i> + <i>Sapium</i>         | 1 | 1   |
| 1181 | <i>Ruprechtia laxiflora</i> + <i>Libidibia paraguariensis</i> + <i>Cordia</i>      | 1 | 1   |
| 1182 | <i>Ruprechtia laxiflora</i> + <i>Libidibia paraguariensis</i> + <i>Gleditsia</i>   | 1 | 1   |
| 1183 | <i>Ruprechtia laxiflora</i> + <i>Myracrodruon</i>                                  | 1 | 1   |
| 1184 | <i>Ruprechtia laxiflora</i> + <i>Myrcianthes cisplatensis</i>                      | 1 | 1   |
| 1185 | <i>Ruprechtia laxiflora</i> + <i>Myrcianthes cisplatensis</i> + <i>Celtis</i>      | 1 | 1   |
| 1186 | <i>Ruprechtia laxiflora</i> + <i>Myrcianthes cisplatensis</i> + <i>Copernicia</i>  | 1 | 1   |
| 1187 | <i>Ruprechtia laxiflora</i> + <i>Parapiptadenia excelsa</i> + <i>Libidibia</i>     | 1 | 1   |
| 1188 | <i>Ruprechtia laxiflora</i> + <i>Phytolacca dioica</i> + <i>Senegalia praecox</i>  | 1 | 1   |
| 1189 | <i>Ruprechtia laxiflora</i> + <i>Prosopis alba</i> + <i>Phytolacca dioica</i>      | 1 | 1   |
| 1190 | <i>Ruprechtia laxiflora</i> + <i>Schinopsis lorentzii</i> + <i>Sarcomphalus</i>    | 1 | 1   |
| 1191 | <i>Ruprechtia laxiflora</i> + <i>Schinus longifolius</i>                           | 1 | 1   |
| 1192 | <i>Ruprechtia laxiflora</i> + <i>Senegalia praecox</i>                             | 3 | 3   |
| 1193 | <i>Ruprechtia laxiflora</i> + <i>Senegalia praecox</i> + <i>Libidibia</i>          | 1 | 1   |
| 1194 | <i>Ruprechtia laxiflora</i> + <i>Tabebuia nodosa</i> + <i>Geoffroea</i>            | 1 | 1   |
| 1195 | <i>Salta triflora</i>                                                              | 3 | 3   |
| 1196 | <i>Salta triflora</i> + <i>Agonandra excelsa</i> + <i>Schinopsis lorentzii</i>     | 1 | 1   |
| 1197 | <i>Salta triflora</i> + <i>Anadenanthera colubrina</i> + <i>Ruprechtia</i>         | 1 | 1   |
| 1198 | <i>Salta triflora</i> + <i>Anadenanthera colubrina</i> + <i>Sarcomphalus</i>       | 1 | 1   |
| 1199 | <i>Salta triflora</i> + <i>Anadenanthera colubrina</i> + <i>Sideroxylon</i>        | 1 | 1   |
| 1200 | <i>Salta triflora</i> + <i>Aspidosperma quebracho-blanco</i>                       | 4 | 4   |
| 1201 | <i>Salta triflora</i> + <i>Aspidosperma quebracho-</i>                             | 1 | 1   |
| 1202 | <i>Salta triflora</i> + <i>Aspidosperma quebracho-</i>                             | 1 | 1   |
| 1203 | <i>Salta triflora</i> + <i>Aspidosperma quebracho-blanco</i> + <i>Libidibia</i>    | 1 | 1   |
| 1204 | <i>Salta triflora</i> + <i>Aspidosperma quebracho-</i>                             | 1 | 1   |
| 1205 | <i>Salta triflora</i> + <i>Aspidosperma quebracho-</i>                             | 1 | 1   |
| 1206 | <i>Salta triflora</i> + <i>Aspidosperma quebracho-</i>                             | 1 | 1   |
| 1207 | <i>Salta triflora</i> + <i>Aspidosperma quebracho-blanco</i> + <i>Schinopsis</i>   | 1 | 1   |
| 1208 | <i>Salta triflora</i> + <i>Aspidosperma quebracho-blanco</i> + <i>Schinopsis</i>   | 1 | 1   |
| 1209 | <i>Salta triflora</i> + <i>Aspidosperma quebracho-blanco</i> + <i>Senegalia</i>    | 1 | 1   |

|      |                                                                                   |   |   |
|------|-----------------------------------------------------------------------------------|---|---|
| 1210 | <i>Salta triflora</i> + <i>Aspidosperma quebracho-</i>                            | 1 | 1 |
| 1211 | <i>Salta triflora</i> + <i>Aspidosperma quebracho-blanco</i> + <i>Tabebuia</i>    | 1 | 1 |
| 1212 | <i>Salta triflora</i> + <i>Aspidosperma quebracho-blanco</i> + <i>Tabebuia</i>    | 1 | 1 |
| 1213 | <i>Salta triflora</i> + <i>Calycophyllum multiflorum</i> + <i>Phyllostylon</i>    | 1 | 1 |
| 1214 | <i>Salta triflora</i> + <i>Gonopterodendron sarmientoi</i>                        | 2 | 2 |
| 1215 | <i>Salta triflora</i> + <i>Gonopterodendron</i>                                   | 1 | 1 |
| 1216 | <i>Salta triflora</i> + <i>Gonopterodendron</i>                                   | 1 | 1 |
| 1217 | <i>Salta triflora</i> + <i>Gonopterodendron sarmientoi</i> + <i>Prosopis</i>      | 1 | 1 |
| 1218 | <i>Salta triflora</i> + <i>Gonopterodendron</i>                                   | 1 | 1 |
| 1219 | <i>Salta triflora</i> + <i>Gonopterodendron</i>                                   | 1 | 1 |
| 1220 | <i>Salta triflora</i> + <i>Gonopterodendron sarmientoi</i> + <i>Sarcotoximum</i>  | 1 | 1 |
| 1221 | <i>Salta triflora</i> + <i>Libidibia paraguariensis</i>                           | 2 | 2 |
| 1222 | <i>Salta triflora</i> + <i>Libidibia paraguariensis</i> + <i>Aspidosperma</i>     | 1 | 1 |
| 1223 | <i>Salta triflora</i> + <i>Libidibia paraguariensis</i> + <i>Aspidosperma</i>     | 1 | 1 |
| 1224 | <i>Salta triflora</i> + <i>Libidibia paraguariensis</i> + <i>Calycophyllum</i>    | 1 | 1 |
| 1225 | <i>Salta triflora</i> + <i>Libidibia paraguariensis</i> + <i>Ceiba chodatii</i>   | 1 | 1 |
| 1226 | <i>Salta triflora</i> + <i>Libidibia paraguariensis</i> + <i>Sarcomphalus</i>     | 3 | 3 |
| 1227 | <i>Salta triflora</i> + <i>Phyllostylon rhamnoides</i> + <i>Calycophyllum</i>     | 1 | 1 |
| 1228 | <i>Salta triflora</i> + <i>Pisonia zapallo</i>                                    | 1 | 1 |
| 1229 | <i>Salta triflora</i> + <i>Prosopis alba</i>                                      | 1 | 1 |
| 1230 | <i>Salta triflora</i> + <i>Prosopis alba</i> + <i>Schinopsis lorentzii</i>        | 2 | 2 |
| 1231 | <i>Salta triflora</i> + <i>Prosopis kuntzei</i>                                   | 1 | 1 |
| 1232 | <i>Salta triflora</i> + <i>Prosopis kuntzei</i> + <i>Cordia americana</i>         | 1 | 1 |
| 1233 | <i>Salta triflora</i> + <i>Prosopis kuntzei</i> + <i>Sarcomphalus</i>             | 1 | 1 |
| 1234 | <i>Salta triflora</i> + <i>Prosopis kuntzei</i> + <i>Sarcomphalus</i>             | 1 | 1 |
| 1235 | <i>Salta triflora</i> + <i>Prosopis nigra</i> + <i>Prosopis hassleri</i>          | 1 | 1 |
| 1236 | <i>Salta triflora</i> + <i>Prosopis ruscifolia</i> + <i>Tabebuia</i>              | 1 | 1 |
| 1237 | <i>Salta triflora</i> + <i>Sarcomphalus mistol</i>                                | 4 | 4 |
| 1238 | <i>Salta triflora</i> + <i>Sarcomphalus mistol</i> + <i>Anisocapparis</i>         | 1 | 1 |
| 1239 | <i>Salta triflora</i> + <i>Sarcomphalus mistol</i> + <i>Aspidosperma</i>          | 2 | 2 |
| 1240 | <i>Salta triflora</i> + <i>Sarcomphalus mistol</i> + <i>Ceiba chodatii</i>        | 1 | 1 |
| 1241 | <i>Salta triflora</i> + <i>Sarcomphalus mistol</i> + <i>Prosopis nigra</i>        | 1 | 1 |
| 1242 | <i>Salta triflora</i> + <i>Sarcomphalus mistol</i> + <i>Schinopsis lorentzii</i>  | 2 | 2 |
| 1243 | <i>Salta triflora</i> + <i>Sarcomphalus mistol</i> + <i>Schinopsis</i>            | 1 | 1 |
| 1244 | <i>Salta triflora</i> + <i>Sarcomphalus mistol</i> + <i>Sideroxylon</i>           | 1 | 1 |
| 1245 | <i>Salta triflora</i> + <i>Schinopsis lorentzii</i>                               | 1 | 1 |
| 1246 | <i>Salta triflora</i> + <i>Schinopsis lorentzii</i> + <i>Aspidosperma</i>         | 2 | 2 |
| 1247 | <i>Salta triflora</i> + <i>Schinopsis lorentzii</i> + <i>Aspidosperma</i>         | 1 | 1 |
| 1248 | <i>Salta triflora</i> + <i>Schinopsis lorentzii</i> + <i>Libidibia</i>            | 1 | 1 |
| 1249 | <i>Salta triflora</i> + <i>Schinopsis lorentzii</i> + <i>Sarcomphalus mistol</i>  | 1 | 1 |
| 1250 | <i>Salta triflora</i> + <i>Schinopsis lorentzii</i> + <i>Sarcomphalus</i>         | 1 | 1 |
| 1251 | <i>Salta triflora</i> + <i>Schinopsis lorentzii</i> + <i>Sideroxylon</i>          | 1 | 1 |
| 1252 | <i>Salta triflora</i> + <i>Schinus longifolius</i> + <i>Bougainvillea</i>         | 1 | 1 |
| 1253 | <i>Salta triflora</i> + <i>Senegalia praecox</i> + <i>Bougainvillea praecox</i>   | 1 | 1 |
| 1254 | <i>Salta triflora</i> + <i>Senegalia praecox</i> + <i>Handroanthus</i>            | 1 | 1 |
| 1255 | <i>Salta triflora</i> + <i>Senegalia praecox</i> + <i>Prosopis ruscifolia</i>     | 1 | 1 |
| 1256 | <i>Salta triflora</i> + <i>Senegalia praecox</i> + <i>Sarcomphalus</i>            | 1 | 1 |
| 1257 | <i>Salta triflora</i> + <i>Sideroxylon obtusifolium</i> + <i>Gonopterodendron</i> | 1 | 1 |
| 1258 | <i>Salta triflora</i> + <i>Sideroxylon obtusifolium</i> + <i>Prosopis</i>         | 1 | 1 |
| 1259 | <i>Salta triflora</i> + <i>Sideroxylon obtusifolium</i> + <i>Sarcomphalus</i>     | 1 | 1 |
| 1260 | <i>Salta triflora</i> + <i>Sideroxylon obtusifolium</i> + <i>Schinopsis</i>       | 1 | 1 |
| 1261 | <i>Salta triflora</i> + <i>Sideroxylon obtusifolium</i> + <i>Schinopsis</i>       | 1 | 1 |
| 1262 | <i>Salta triflora</i> + <i>Tabebuia nodosa</i>                                    | 1 | 1 |
| 1263 | <i>Salta triflora</i> + <i>Tabebuia nodosa</i> + <i>Aspidosperma quebracho-</i>   | 1 | 1 |
| 1264 | <i>Salta triflora</i> + <i>Tabebuia nodosa</i> + <i>Libidibia paraguariensis</i>  | 1 | 1 |
| 1265 | <i>Salta triflora</i> + <i>Tabebuia nodosa</i> + <i>Mimozyanthus carinatus</i>    | 1 | 1 |
| 1266 | <i>Salta triflora</i> + <i>Tabebuia nodosa</i> + <i>Senegalia praecox</i>         | 1 | 1 |

**Prosopis + others**

|      |                                                                                 |   |   |    |
|------|---------------------------------------------------------------------------------|---|---|----|
| 1267 | <i>Aspidosperma quebracho-blanco</i>                                            | 1 |   | 1  |
| 1268 | <i>Bougainvillea praecox</i> + <i>Prosopis alba</i> + <i>Aspidosperma</i>       |   | 1 | 1  |
| 1269 | <i>Bougainvillea stipitata</i> + <i>Prosopis flexuosa</i>                       |   | 1 | 1  |
| 1270 | <i>Bulnesia retama</i> + <i>Prosopis flexuosa</i>                               |   | 1 | 1  |
| 1271 | <i>Bulnesia retama</i> + <i>Prosopis flexuosa</i> + <i>Parkinsonia praecox</i>  |   | 1 | 1  |
| 1272 | <i>Erythroxylum microphyllum</i> + <i>Prosopis affinis</i>                      | 1 |   | 1  |
| 1273 | <i>Geoffroea decorticans</i>                                                    | 4 |   | 4  |
| 1274 | <i>Jodina rhombifolia</i> + <i>Prosopis nigra</i> + <i>Sarcomphalus mistol</i>  |   | 1 | 1  |
| 1275 | <i>Phytolacca dioica</i> + <i>Prosopis affinis</i> + <i>Scutia buxifolia</i>    | 1 |   | 1  |
| 1276 | <i>Pouteria salicifolia</i> + <i>Prosopis affinis</i> + <i>Scutia buxifolia</i> | 1 |   | 1  |
| 1277 | <i>Prosopis affinis</i>                                                         | 5 | 1 | 6  |
| 1278 | <i>Prosopis affinis</i> + <i>Myracrodruon balansae</i> + <i>Ruprechtia</i>      |   | 1 | 1  |
| 1279 | <i>Prosopis affinis</i> + <i>Prosopis nigra</i>                                 | 2 |   | 2  |
| 1280 | <i>Prosopis affinis</i> + <i>Prosopis nigra</i> + <i>Trithrinax campestris</i>  | 1 |   | 1  |
| 1281 | <i>Prosopis affinis</i> + <i>Schinus longifolius</i>                            | 1 |   | 1  |
| 1282 | <i>Prosopis affinis</i> + <i>Scutia buxifolia</i>                               | 1 |   | 1  |
| 1283 | <i>Prosopis affinis</i> + <i>Sideroxylon obtusifolium</i>                       | 1 | 1 | 2  |
| 1284 | <i>Prosopis affinis</i> + <i>Trithrinax campestris</i>                          | 1 |   | 1  |
| 1285 | <i>Prosopis affinis</i> + <i>Trithrinax campestris</i> + <i>Prosopis nigra</i>  | 1 |   | 1  |
| 1286 | <i>Prosopis affinis</i> + <i>Vachellia astringens</i>                           | 1 |   | 1  |
| 1287 | <i>Prosopis affinis</i> + <i>Vachellia caven</i>                                | 9 |   | 9  |
| 1288 | <i>Prosopis affinis</i> + <i>Vachellia caven</i> + <i>Prosopis nigra</i>        | 2 |   | 2  |
| 1289 | <i>Prosopis affinis</i> + <i>Vachellia caven</i> + <i>Trithrinax campestris</i> | 1 |   | 1  |
| 1290 | <i>Prosopis affinis</i> + <i>Zanthoxylum rhoifolium</i> + <i>Geoffroea</i>      |   | 1 | 1  |
| 1291 | <i>Prosopis affinis</i> + <i>Zanthoxylum rhoifolium</i> + <i>Prosopis nigra</i> | 1 |   | 1  |
| 1292 | <i>Prosopis alba</i>                                                            | 1 | 3 | 16 |
| 1293 | <i>Prosopis alba</i> + <i>Albizia inundata</i> + <i>Prosopis ruscifolia</i>     |   | 1 | 1  |
| 1294 | <i>Prosopis alba</i> + <i>Anisocapparis speciosa</i>                            |   | 1 | 1  |
| 1295 | <i>Prosopis alba</i> + <i>Aspidosperma quebracho-blanco</i>                     | 1 | 2 | 3  |
| 1296 | <i>Prosopis alba</i> + <i>Aspidosperma quebracho-</i>                           |   | 2 | 2  |
| 1297 | <i>Prosopis alba</i> + <i>Celtis chichape</i>                                   |   | 1 | 1  |
| 1298 | <i>Prosopis alba</i> + <i>Celtis chichape</i> + <i>Sarcomphalus mistol</i>      |   | 1 | 1  |
| 1299 | <i>Prosopis alba</i> + <i>Celtis ehrenbergiana</i>                              |   | 1 | 1  |
| 1300 | <i>Prosopis alba</i> + <i>Celtis ehrenbergiana</i> + <i>Condalia buxifolia</i>  |   | 1 | 1  |
| 1301 | <i>Prosopis alba</i> + <i>Celtis iguanaea</i>                                   |   | 1 | 1  |
| 1302 | <i>Prosopis alba</i> + <i>Celtis iguanaea</i> + <i>Pterogyne nitens</i>         |   | 1 | 1  |
| 1303 | <i>Prosopis alba</i> + <i>Copernicia alba</i>                                   |   | 1 | 1  |
| 1304 | <i>Prosopis alba</i> + <i>Cynophalla retusa</i> + <i>Celtis iguanaea</i>        |   | 1 | 1  |
| 1305 | <i>Prosopis alba</i> + <i>Diplokeleba floribunda</i> + <i>Ruprechtia</i>        |   | 1 | 1  |
| 1306 | <i>Prosopis alba</i> + <i>Geoffroea decorticans</i>                             |   | 3 | 3  |
| 1307 | <i>Prosopis alba</i> + <i>Geoffroea decorticans</i> + <i>Castela coccinea</i>   |   | 1 | 1  |
| 1308 | <i>Prosopis alba</i> + <i>Geoffroea decorticans</i> + <i>Sideroxylon</i>        |   | 1 | 1  |
| 1309 | <i>Prosopis alba</i> + <i>Gonopterodendron sarmientoi</i>                       |   | 1 | 1  |
| 1310 | <i>Prosopis alba</i> + <i>Gonopterodendron</i>                                  |   | 1 | 1  |
| 1311 | <i>Prosopis alba</i> + <i>Libidibia paraguariensis</i>                          |   | 2 | 2  |
| 1312 | <i>Prosopis alba</i> + <i>Libidibia paraguariensis</i> + <i>Ceiba</i>           |   | 1 | 1  |
| 1313 | <i>Prosopis alba</i> + <i>Parkinsonia praecox</i>                               |   | 1 | 1  |
| 1314 | <i>Prosopis alba</i> + <i>Parkinsonia praecox</i> + <i>Prosopis torquata</i>    |   | 1 | 1  |
| 1315 | <i>Prosopis alba</i> + <i>Phyllostylon rhamnoides</i> + <i>Diplokeleba</i>      |   | 1 | 1  |
| 1316 | <i>Prosopis alba</i> + <i>Phytolacca dioica</i> + <i>Senegalia praecox</i>      |   | 1 | 1  |
| 1317 | <i>Prosopis alba</i> + <i>Pisonia zapallo</i>                                   |   | 1 | 1  |
| 1318 | <i>Prosopis alba</i> + <i>Pisonia zapallo</i> + <i>Prosopis ruscifolia</i>      |   | 1 | 1  |
| 1319 | <i>Prosopis alba</i> + <i>Pisonia zapallo</i> + <i>Salta triflora</i>           |   | 1 | 1  |
| 1320 | <i>Prosopis alba</i> + <i>Pisonia zapallo</i> + <i>Salta</i>                    |   | 1 | 1  |
| 1321 | <i>Prosopis alba</i> + <i>Pisonia zapallo</i> + <i>Schinopsis lorentzii</i>     |   | 1 | 1  |
| 1322 | <i>Prosopis alba</i> + <i>Pisonia zapallo</i> + <i>Senegalia praecox</i>        |   | 1 | 1  |

|      |                                                                                        |    |    |    |
|------|----------------------------------------------------------------------------------------|----|----|----|
| 1323 | <i>Prosopis alba</i> + <i>Prosopis elata</i>                                           |    | 1  | 1  |
| 1324 | <i>Prosopis alba</i> + <i>Prosopis flexuosa</i>                                        | 1  | 1  | 2  |
| 1325 | <i>Prosopis alba</i> + <i>Prosopis kuntzei</i> + <i>Aspidosperma quebracho-</i>        |    | 1  | 1  |
| 1326 | <i>Prosopis alba</i> + <i>Prosopis kuntzei</i> + <i>Sarcomphalus mistol</i>            |    | 1  | 1  |
| 1327 | <i>Prosopis alba</i> + <i>Prosopis nigra</i>                                           |    | 2  | 2  |
| 1328 | <i>Prosopis alba</i> + <i>Prosopis nigra</i> + <i>Schinus</i>                          |    | 1  | 1  |
| 1329 | <i>Prosopis alba</i> + <i>Prosopis ruscifolia</i> + <i>Tabebuia nodosa</i>             |    | 1  | 1  |
| 1330 | <i>Prosopis alba</i> + <i>Prosopis torquata</i>                                        | 1  | 2  | 3  |
| 1331 | <i>Prosopis alba</i> + <i>Pterogyne nitens</i>                                         |    | 1  | 1  |
| 1332 | <i>Prosopis alba</i> + <i>Ruprechtia apetala</i> + <i>Senegalia praecox</i>            |    | 1  | 1  |
| 1333 | <i>Prosopis alba</i> + <i>Salta triflora</i>                                           |    | 3  | 3  |
| 1334 | <i>Prosopis alba</i> + <i>Salta triflora</i> + <i>Aspidosperma quebracho-</i>          |    | 1  | 1  |
| 1335 | <i>Prosopis alba</i> + <i>Salta triflora</i> + <i>Geoffroea</i>                        |    | 1  | 1  |
| 1336 | <i>Prosopis alba</i> + <i>Sarcomphalus mistol</i>                                      |    | 7  | 7  |
| 1337 | <i>Prosopis alba</i> + <i>Sarcomphalus mistol</i> + <i>Lachesiodendron</i>             |    | 1  | 1  |
| 1338 | <i>Prosopis alba</i> + <i>Sarcomphalus mistol</i> + <i>Libidibia</i>                   |    | 1  | 1  |
| 1339 | <i>Prosopis alba</i> + <i>Sarcomphalus mistol</i> + <i>Salta triflora</i>              |    | 1  | 1  |
| 1340 | <i>Prosopis alba</i> + <i>Sarcomphalus mistol</i> + <i>Schinus fasciculatus</i>        |    | 1  | 1  |
| 1341 | <i>Prosopis alba</i> + <i>Schinopsis balansae</i> + <i>Prosopis nigra</i>              |    | 1  | 1  |
| 1342 | <i>Prosopis alba</i> + <i>Schinopsis balansae</i> + <i>Ruprechtia laxiflora</i>        |    | 1  | 1  |
| 1343 | <i>Prosopis alba</i> + <i>Schinopsis balansae</i> + <i>Senegalia praecox</i>           |    | 1  | 1  |
| 1344 | <i>Prosopis alba</i> + <i>Schinopsis balansae</i> + <i>Tabebuia nodosa</i>             |    | 2  | 2  |
| 1345 | <i>Prosopis alba</i> + <i>Schinopsis lorentzii</i> + <i>Aspidosperma</i>               |    | 1  | 1  |
| 1346 | <i>Prosopis alba</i> + <i>Senegalia praecox</i>                                        |    | 1  | 1  |
| 1347 | <i>Prosopis alba</i> + <i>Senegalia praecox</i> + <i>Gleditsia</i>                     |    | 1  | 1  |
| 1348 | <i>Prosopis alba</i> + <i>Senegalia praecox</i> + <i>Gonopterodendron</i>              |    | 1  | 1  |
| 1349 | <i>Prosopis alba</i> + <i>Senegalia praecox</i> + <i>Prosopis kuntzei</i>              |    | 1  | 1  |
| 1350 | <i>Prosopis alba</i> + <i>Senegalia praecox</i> + <i>Vachellia aroma</i>               |    | 1  | 1  |
| 1351 | <i>Prosopis alba</i> + <i>Sideroxylon obtusifolium</i>                                 |    | 3  | 3  |
| 1352 | <i>Prosopis alba</i> + <i>Tabebuia nodosa</i>                                          |    | 2  | 2  |
| 1353 | <i>Prosopis alba</i> + <i>Tabebuia nodosa</i> + <i>Prosopis kuntzei</i>                |    | 1  | 1  |
| 1354 | <i>Prosopis alba</i> + <i>Tabebuia nodosa</i> + <i>Senegalia praecox</i>               |    | 1  | 1  |
| 1355 | <i>Prosopis alba</i> + <i>Trithrinax campestris</i> + <i>Senegalia</i>                 | 1  |    | 1  |
| 1356 | <i>Prosopis alba</i> + <i>Vachellia aroma</i>                                          |    | 2  | 2  |
| 1357 | <i>Prosopis alba</i> + <i>Vachellia aroma</i> + <i>Geoffroea decorticans</i>           |    | 1  | 1  |
| 1358 | <i>Prosopis alba</i> + <i>Vachellia aroma</i> + <i>Myrrhinium</i>                      |    | 1  | 1  |
| 1359 | <i>Prosopis alba</i> + <i>Vachellia aroma</i> + <i>Prosopis nigra</i> + <i>Schinus</i> |    | 1  | 1  |
| 1360 | <i>Prosopis alpataco</i>                                                               | 2  |    | 2  |
| 1361 | <i>Prosopis alpataco</i> + <i>Geoffroea decorticans</i>                                | 1  |    | 1  |
| 1362 | <i>Prosopis alpataco</i> + <i>Vachellia caven</i>                                      |    | 1  | 1  |
| 1363 | <i>Prosopis caldenia</i>                                                               | 72 | 1  | 73 |
| 1364 | <i>Prosopis caldenia</i> + <i>Geoffroea decorticans</i>                                | 1  |    | 1  |
| 1365 | <i>Prosopis caldenia</i> + <i>Jodina rhombifolia</i>                                   | 1  |    | 1  |
| 1366 | <i>Prosopis caldenia</i> + <i>Prosopis flexuosa</i>                                    | 4  |    | 4  |
| 1367 | <i>Prosopis caldenia</i> + <i>Prosopis nigra</i>                                       |    | 1  | 1  |
| 1368 | <i>Prosopis caldenia</i> + <i>Schinus polygamus</i>                                    | 2  |    | 2  |
| 1369 | <i>Prosopis chilensis</i>                                                              | 2  | 4  | 8  |
| 1370 | <i>Prosopis chilensis</i> + <i>Aspidosperma quebracho-blanco</i>                       |    | 1  | 1  |
| 1371 | <i>Prosopis chilensis</i> + <i>Celtis ehrenbergiana</i>                                |    | 1  | 2  |
| 1372 | <i>Prosopis chilensis</i> + <i>Prosopis alba</i>                                       |    | 1  | 1  |
| 1373 | <i>Prosopis chilensis</i> + <i>Prosopis flexuosa</i>                                   |    | 1  | 1  |
| 1374 | <i>Prosopis chilensis</i> + <i>Prosopis flexuosa</i> + <i>Prosopis torquata</i>        |    | 1  | 1  |
| 1375 | <i>Prosopis elata</i> + <i>Sarcomphalus mistol</i>                                     |    | 1  | 1  |
| 1376 | <i>Prosopis flexuosa</i>                                                               | 6  | 37 | 48 |
| 1377 | <i>Prosopis flexuosa</i> + <i>Aspidosperma quebracho-blanco</i>                        |    | 6  | 6  |
| 1378 | <i>Prosopis flexuosa</i> + <i>Atamisquea emarginata</i>                                |    | 1  | 1  |
| 1379 | <i>Prosopis flexuosa</i> + <i>Bulnesia retama</i>                                      |    | 1  | 2  |

|      |                                                                                    |   |    |   |    |    |
|------|------------------------------------------------------------------------------------|---|----|---|----|----|
| 1380 | <i>Prosopis flexuosa</i> + <i>Bulnesia retama</i> + <i>Aspidosperma</i>            |   |    |   | 1  | 1  |
| 1381 | <i>Prosopis flexuosa</i> + <i>Bulnesia retama</i> + <i>Parkinsonia praecox</i>     |   |    |   | 1  | 1  |
| 1382 | <i>Prosopis flexuosa</i> + <i>Geoffroea decorticans</i>                            | 1 | 3  |   | 1  | 5  |
| 1383 | <i>Prosopis flexuosa</i> + <i>Larrea cuneifolia</i>                                |   | 1  |   |    | 1  |
| 1384 | <i>Prosopis flexuosa</i> + <i>Larrea divaricata</i>                                |   |    |   | 2  | 2  |
| 1385 | <i>Prosopis flexuosa</i> + <i>Mimozyanthus carinatus</i>                           |   |    |   | 2  | 2  |
| 1386 | <i>Prosopis flexuosa</i> + <i>Parkinsonia praecox</i>                              | 2 |    |   | 12 | 14 |
| 1387 | <i>Prosopis flexuosa</i> + <i>Parkinsonia praecox</i> + <i>Bulnesia retama</i>     |   |    |   | 1  | 1  |
| 1388 | <i>Prosopis flexuosa</i> + <i>Parkinsonia praecox</i> + <i>Mimozyanthus</i>        |   |    |   | 1  | 1  |
| 1389 | <i>Prosopis flexuosa</i> + <i>Prosopis alba</i>                                    | 2 | 1  |   |    | 3  |
| 1390 | <i>Prosopis flexuosa</i> + <i>Prosopis alpataco</i>                                |   |    |   | 1  | 1  |
| 1391 | <i>Prosopis flexuosa</i> + <i>Prosopis caldenia</i>                                | 1 |    |   |    | 1  |
| 1392 | <i>Prosopis flexuosa</i> + <i>Prosopis nigra</i>                                   |   | 2  |   | 1  | 3  |
| 1393 | <i>Prosopis flexuosa</i> + <i>Prosopis torquata</i>                                |   |    |   | 4  | 4  |
| 1394 | <i>Prosopis flexuosa</i> + <i>Ramorinoa girolae</i>                                |   | 1  |   |    | 1  |
| 1395 | <i>Prosopis flexuosa</i> + <i>Sarcomphalus mistol</i>                              |   |    |   | 1  | 1  |
| 1396 | <i>Prosopis flexuosa</i> + <i>Schinus fasciculatus</i>                             |   |    |   | 1  | 1  |
| 1397 | <i>Prosopis hassleri</i>                                                           |   |    |   | 1  | 1  |
| 1398 | <i>Prosopis hassleri</i> + <i>Copernicia alba</i>                                  |   |    |   | 1  | 1  |
| 1399 | <i>Prosopis hassleri</i> + <i>Pisonia zapallo</i> + <i>Prosopis ruscifolia</i>     |   |    |   | 1  | 1  |
| 1400 | <i>Prosopis hassleri</i> + <i>Prosopis ruscifolia</i> + <i>Prosopis nigra</i>      |   |    |   | 1  | 1  |
| 1401 | <i>Prosopis hassleri</i> + <i>Sarcomphalus mistol</i> + <i>Sideroxylon</i>         |   |    |   | 1  | 1  |
| 1402 | <i>Prosopis kuntzei</i>                                                            |   |    |   | 1  | 1  |
| 1403 | <i>Prosopis kuntzei</i> + <i>Anisocapparis speciosa</i>                            |   |    |   | 1  | 1  |
| 1404 | <i>Prosopis kuntzei</i> + <i>Aspidosperma quebracho-blanco</i>                     |   |    |   | 1  | 1  |
| 1405 | <i>Prosopis kuntzei</i> + <i>Aspidosperma quebracho-blanco</i> + <i>Pisonia</i>    |   |    |   | 1  | 1  |
| 1406 | <i>Prosopis kuntzei</i> + <i>Aspidosperma quebracho-blanco</i> + <i>Salta</i>      |   |    |   | 1  | 1  |
| 1407 | <i>Prosopis kuntzei</i> + <i>Aspidosperma quebracho-</i>                           |   |    |   | 1  | 1  |
| 1408 | <i>Prosopis kuntzei</i> + <i>Aspidosperma quebracho-</i>                           |   |    |   | 1  | 1  |
| 1409 | <i>Prosopis kuntzei</i> + <i>Aspidosperma quebracho-</i>                           |   |    |   | 1  | 1  |
| 1410 | <i>Prosopis kuntzei</i> + <i>Aspidosperma quebracho-</i>                           |   |    |   | 1  | 1  |
| 1411 | <i>Prosopis kuntzei</i> + <i>Aspidosperma quebracho-</i>                           |   |    |   | 1  | 1  |
| 1412 | <i>Prosopis kuntzei</i> + <i>Bougainvillea praecox</i> + <i>Aspidosperma</i>       |   |    |   | 1  | 1  |
| 1413 | <i>Prosopis kuntzei</i> + <i>Libidibia paraguariensis</i> + <i>Prosopis nigra</i>  |   |    |   | 1  | 1  |
| 1414 | <i>Prosopis kuntzei</i> + <i>Prosopis alba</i> + <i>Senegalia gilliesii</i>        |   |    |   | 1  | 1  |
| 1415 | <i>Prosopis kuntzei</i> + <i>Prosopis nigra</i>                                    |   |    |   | 1  | 1  |
| 1416 | <i>Prosopis kuntzei</i> + <i>Prosopis nigra</i> + <i>Aspidosperma</i>              |   |    |   | 1  | 1  |
| 1417 | <i>Prosopis kuntzei</i> + <i>Prosopis ruscifolia</i>                               |   |    |   | 1  | 1  |
| 1418 | <i>Prosopis kuntzei</i> + <i>Prosopis ruscifolia</i> + <i>Prosopis</i>             |   |    |   | 1  | 1  |
| 1419 | <i>Prosopis kuntzei</i> + <i>Sarcomphalus mistol</i>                               |   |    |   | 1  | 1  |
| 1420 | <i>Prosopis kuntzei</i> + <i>Sarcomphalus mistol</i> + <i>Aspidosperma</i>         |   |    |   | 1  | 1  |
| 1421 | <i>Prosopis kuntzei</i> + <i>Sarcomphalus mistol</i> + <i>Prosopis</i>             |   |    |   | 1  | 1  |
| 1422 | <i>Prosopis kuntzei</i> + <i>Sarcomphalus mistol</i> + <i>Schinopsis</i>           |   |    |   | 1  | 1  |
| 1423 | <i>Prosopis kuntzei</i> + <i>Sarcomphalus mistol</i> + <i>Senegalia praecox</i>    |   |    |   | 1  | 1  |
| 1424 | <i>Prosopis kuntzei</i> + <i>Schinopsis balansae</i> + <i>Aspidosperma</i>         |   |    |   | 1  | 1  |
| 1425 | <i>Prosopis kuntzei</i> + <i>Schinopsis heterophylla</i>                           |   |    |   | 1  | 1  |
| 1426 | <i>Prosopis kuntzei</i> + <i>Schinopsis lorentzii</i>                              |   |    |   | 2  | 2  |
| 1427 | <i>Prosopis kuntzei</i> + <i>Schinopsis lorentzii</i> + <i>Aspidosperma</i>        |   |    |   | 1  | 1  |
| 1428 | <i>Prosopis kuntzei</i> + <i>Schinopsis lorentzii</i> + <i>Sarcomphalus mistol</i> |   |    |   | 1  | 1  |
| 1429 | <i>Prosopis kuntzei</i> + <i>Schinopsis lorentzii</i> + <i>Sarcomphalus</i>        |   |    |   | 1  | 1  |
| 1430 | <i>Prosopis kuntzei</i> + <i>Schinopsis lorentzii</i> + <i>Sideroxylon</i>         |   |    |   | 1  | 1  |
| 1431 | <i>Prosopis kuntzei</i> + <i>Senegalia praecox</i>                                 |   |    |   | 3  | 3  |
| 1432 | <i>Prosopis kuntzei</i> + <i>Senegalia praecox</i> + <i>Achatocarpus</i>           |   |    |   | 1  | 1  |
| 1433 | <i>Prosopis kuntzei</i> + <i>Sideroxylon obtusifolium</i> + <i>Bougainvillea</i>   |   |    |   | 1  | 1  |
| 1434 | <i>Prosopis kuntzei</i> + <i>Tabebuia nodosa</i> + <i>Salta</i>                    |   |    |   | 1  | 1  |
| 1435 | <i>Prosopis nigra</i>                                                              | 2 | 11 | 5 | 40 | 58 |
| 1436 | <i>Prosopis nigra</i> + <i>Geoffroea decorticans</i>                               |   | 2  |   |    | 2  |

|      |                                                                                    |   |    |    |
|------|------------------------------------------------------------------------------------|---|----|----|
| 1437 | <i>Prosopis nigra</i> + <i>Aspidosperma quebracho-blanco</i>                       | 1 | 16 | 17 |
| 1438 | <i>Prosopis nigra</i> + <i>Aspidosperma quebracho-</i>                             |   | 1  | 1  |
| 1439 | <i>Prosopis nigra</i> + <i>Aspidosperma quebracho-</i>                             |   | 4  | 4  |
| 1440 | <i>Prosopis nigra</i> + <i>Aspidosperma quebracho-</i>                             |   | 2  | 2  |
| 1441 | <i>Prosopis nigra</i> + <i>Aspidosperma quebracho-blanco</i> + <i>Schinus</i>      |   | 1  | 1  |
| 1442 | <i>Prosopis nigra</i> + <i>Bulnesia retama</i>                                     | 1 |    | 1  |
| 1443 | <i>Prosopis nigra</i> + <i>Celtis chichape</i> + <i>Sarcomphalus mistol</i>        |   | 1  | 1  |
| 1444 | <i>Prosopis nigra</i> + <i>Celtis ehrenbergiana</i>                                |   | 4  | 4  |
| 1445 | <i>Prosopis nigra</i> + <i>Celtis ehrenbergiana</i> + <i>Prosopis vinalillo</i>    |   | 1  | 1  |
| 1446 | <i>Prosopis nigra</i> + <i>Copernicia alba</i>                                     |   | 1  | 1  |
| 1447 | <i>Prosopis nigra</i> + <i>Copernicia alba</i> + <i>Phyllostylon rhamnoides</i>    |   | 1  | 1  |
| 1448 | <i>Prosopis nigra</i> + <i>Copernicia alba</i> + <i>Prosopis alba</i>              |   | 1  | 1  |
| 1449 | <i>Prosopis nigra</i> + <i>Copernicia alba</i> + <i>Tabebuia nodosa</i>            |   | 1  | 1  |
| 1450 | <i>Prosopis nigra</i> + <i>Cynophalla retusa</i> + <i>Prosopis ruscifolia</i>      |   | 2  | 2  |
| 1451 | <i>Prosopis nigra</i> + <i>Diplokeleba floribunda</i> + <i>Senegalia praecox</i>   |   | 1  | 1  |
| 1452 | <i>Prosopis nigra</i> + <i>Eugenia uniflora</i>                                    |   | 1  | 1  |
| 1453 | <i>Prosopis nigra</i> + <i>Geoffroea decorticans</i>                               | 2 | 6  | 8  |
| 1454 | <i>Prosopis nigra</i> + <i>Geoffroea decorticans</i> + <i>Condalia</i>             |   | 1  | 1  |
| 1455 | <i>Prosopis nigra</i> + <i>Geoffroea decorticans</i> + <i>Schinopsis lorentzii</i> | 1 |    | 1  |
| 1456 | <i>Prosopis nigra</i> + <i>Geoffroea decorticans</i> + <i>Sideroxylon</i>          |   | 1  | 1  |
| 1457 | <i>Prosopis nigra</i> + <i>Gleditsia amorphoides</i>                               |   | 1  | 1  |
| 1458 | <i>Prosopis nigra</i> + <i>Libidibia paraguariensis</i> + <i>Sarcomphalus</i>      |   | 1  | 1  |
| 1459 | <i>Prosopis nigra</i> + <i>Myrcianthes cisplatensis</i> + <i>Celtis</i>            |   | 1  | 1  |
| 1460 | <i>Prosopis nigra</i> + <i>Parkinsonia praecox</i>                                 |   | 3  | 3  |
| 1461 | <i>Prosopis nigra</i> + <i>Parkinsonia praecox</i> + <i>Aspidosperma</i>           |   | 1  | 1  |
| 1462 | <i>Prosopis nigra</i> + <i>Parkinsonia praecox</i> + <i>Prosopis ruscifolia</i>    |   | 1  | 1  |
| 1463 | <i>Prosopis nigra</i> + <i>Parkinsonia praecox</i> + <i>Sarcomphalus mistol</i>    |   | 1  | 1  |
| 1464 | <i>Prosopis nigra</i> + <i>Parkinsonia praecox</i> + <i>Schinopsis balansae</i>    |   | 1  | 1  |
| 1465 | <i>Prosopis nigra</i> + <i>Parkinsonia praecox</i> + <i>Senegalia gilliesii</i>    |   | 1  | 1  |
| 1466 | <i>Prosopis nigra</i> + <i>Pisonia zapallo</i> + <i>Copernicia alba</i>            |   | 1  | 1  |
| 1467 | <i>Prosopis nigra</i> + <i>Prosopis affinis</i>                                    | 1 | 2  | 3  |
| 1468 | <i>Prosopis nigra</i> + <i>Prosopis alba</i>                                       |   | 1  | 1  |
| 1469 | <i>Prosopis nigra</i> + <i>Prosopis alba</i> + <i>Senegalia</i>                    |   | 1  | 1  |
| 1470 | <i>Prosopis nigra</i> + <i>Prosopis chilensis</i>                                  |   | 1  | 1  |
| 1471 | <i>Prosopis nigra</i> + <i>Prosopis flexuosa</i>                                   | 1 | 1  | 2  |
| 1472 | <i>Prosopis nigra</i> + <i>Prosopis kuntzei</i>                                    |   | 3  | 3  |
| 1473 | <i>Prosopis nigra</i> + <i>Prosopis kuntzei</i> + <i>Aspidosperma</i>              |   | 1  | 1  |
| 1474 | <i>Prosopis nigra</i> + <i>Prosopis kuntzei</i> + <i>Sarcomphalus mistol</i>       |   | 2  | 2  |
| 1475 | <i>Prosopis nigra</i> + <i>Prosopis ruscifolia</i>                                 |   | 2  | 2  |
| 1476 | <i>Prosopis nigra</i> + <i>Prosopis ruscifolia</i> + <i>Cynophalla</i>             |   | 1  | 1  |
| 1477 | <i>Prosopis nigra</i> + <i>Prosopis ruscifolia</i> + <i>Sarcomphalus</i>           |   | 1  | 1  |
| 1478 | <i>Prosopis nigra</i> + <i>Prosopis vinalillo</i>                                  |   | 1  | 1  |
| 1479 | <i>Prosopis nigra</i> + <i>Ruprechtia laxiflora</i>                                | 1 |    | 1  |
| 1480 | <i>Prosopis nigra</i> + <i>Salta triflora</i>                                      |   | 2  | 2  |
| 1481 | <i>Prosopis nigra</i> + <i>Salta triflora</i> + <i>Aspidosperma quebracho-</i>     |   | 1  | 1  |
| 1482 | <i>Prosopis nigra</i> + <i>Salta triflora</i> + <i>Terminalia triflora</i>         |   | 1  | 1  |
| 1483 | <i>Prosopis nigra</i> + <i>Sapium haematospermum</i>                               |   | 1  | 1  |
| 1484 | <i>Prosopis nigra</i> + <i>Sarcomphalus mistol</i>                                 |   | 11 | 11 |
| 1485 | <i>Prosopis nigra</i> + <i>Sarcomphalus mistol</i> + <i>Aspidosperma</i>           |   | 2  | 2  |
| 1486 | <i>Prosopis nigra</i> + <i>Sarcomphalus mistol</i> + <i>Cynophalla</i>             |   | 1  | 1  |
| 1487 | <i>Prosopis nigra</i> + <i>Sarcomphalus mistol</i> + <i>Geoffroea</i>              |   | 1  | 1  |
| 1488 | <i>Prosopis nigra</i> + <i>Sarcomphalus mistol</i> + <i>Parkinsonia praecox</i>    |   | 1  | 1  |
| 1489 | <i>Prosopis nigra</i> + <i>Sarcomphalus mistol</i> + <i>Prosopis alba</i>          |   | 1  | 1  |
| 1490 | <i>Prosopis nigra</i> + <i>Schinopsis balansae</i>                                 |   | 1  | 1  |
| 1491 | <i>Prosopis nigra</i> + <i>Schinopsis balansae</i> + <i>Celtis ehrenbergiana</i>   |   | 1  | 1  |
| 1492 | <i>Prosopis nigra</i> + <i>Schinopsis balansae</i> + <i>Senegalia praecox</i>      |   | 1  | 1  |
| 1493 | <i>Prosopis nigra</i> + <i>Schinopsis lorentzii</i>                                |   | 1  | 1  |

|      |                                                                                   |    |    |
|------|-----------------------------------------------------------------------------------|----|----|
| 1494 | <i>Prosopis nigra</i> + <i>Schinopsis lorentzii</i> + <i>Aspidosperma</i>         | 2  | 2  |
| 1495 | <i>Prosopis nigra</i> + <i>Schinopsis lorentzii</i> + <i>Parkinsonia praecox</i>  | 1  | 1  |
| 1496 | <i>Prosopis nigra</i> + <i>Schinopsis lorentzii</i> + <i>Prosopis kuntzei</i>     | 1  | 1  |
| 1497 | <i>Prosopis nigra</i> + <i>Schinus fasciculatus</i>                               | 2  | 2  |
| 1498 | <i>Prosopis nigra</i> + <i>Schinus longifolius</i>                                | 1  | 1  |
| 1499 | <i>Prosopis nigra</i> + <i>Schinus longifolius</i> + <i>Celtis</i>                | 1  | 1  |
| 1500 | <i>Prosopis nigra</i> + <i>Senegalia bonariensis</i>                              | 1  | 1  |
| 1501 | <i>Prosopis nigra</i> + <i>Senegalia gilliesii</i>                                | 1  | 1  |
| 1502 | <i>Prosopis nigra</i> + <i>Senegalia gilliesii</i> + <i>Senegalia praecox</i>     | 1  | 1  |
| 1503 | <i>Prosopis nigra</i> + <i>Senegalia praecox</i>                                  | 3  | 3  |
| 1504 | <i>Prosopis nigra</i> + <i>Senegalia praecox</i> + <i>Achatocarpus</i>            | 1  | 1  |
| 1505 | <i>Prosopis nigra</i> + <i>Senegalia praecox</i> + <i>Vachellia aroma</i>         | 1  | 1  |
| 1506 | <i>Prosopis nigra</i> + <i>Sideroxylon obtusifolium</i>                           | 1  | 1  |
| 1507 | <i>Prosopis nigra</i> + <i>Sideroxylon obtusifolium</i> + <i>Schinopsis</i>       | 1  | 1  |
| 1508 | <i>Prosopis nigra</i> + <i>Sideroxylon obtusifolium</i> + <i>Scutia buxifolia</i> | 1  | 1  |
| 1509 | <i>Prosopis nigra</i> + <i>Sideroxylon obtusifolium</i> + <i>Senegalia</i>        | 1  | 1  |
| 1510 | <i>Prosopis nigra</i> + <i>Tabebuia nodosa</i>                                    | 3  | 3  |
| 1511 | <i>Prosopis nigra</i> + <i>Tabebuia nodosa</i> + <i>Gleditsia amorphoides</i>     | 1  | 1  |
| 1512 | <i>Prosopis nigra</i> + <i>Tabebuia nodosa</i> + <i>Schinopsis balansae</i>       | 1  | 1  |
| 1513 | <i>Prosopis nigra</i> + <i>Tessaria integrifolia</i>                              | 1  | 1  |
| 1514 | <i>Prosopis nigra</i> + <i>Trithrinax campestris</i>                              | 2  | 2  |
| 1515 | <i>Prosopis nigra</i> + <i>Trithrinax campestris</i> + <i>Vachellia caven</i>     | 1  | 1  |
| 1516 | <i>Prosopis nigra</i> + <i>Vachellia aroma</i>                                    | 3  | 3  |
| 1517 | <i>Prosopis nigra</i> + <i>Vachellia astringens</i>                               | 1  | 1  |
| 1518 | <i>Prosopis nigra</i> + <i>Vachellia caven</i>                                    | 4  | 4  |
| 1519 | <i>Prosopis nigra</i> + <i>Vachellia caven</i> + <i>Geoffroea</i>                 | 1  | 1  |
| 1520 | <i>Prosopis nigra</i> + <i>Vachellia caven</i> + <i>Ruprechtia laxiflora</i>      | 1  | 1  |
| 1521 | <i>Prosopis ruscifolia</i>                                                        | 75 | 75 |
| 1522 | <i>Prosopis ruscifolia</i> + <i>Aspidosperma quebracho-blanco</i>                 | 4  | 4  |
| 1523 | <i>Prosopis ruscifolia</i> + <i>Aspidosperma quebracho-</i>                       | 1  | 1  |
| 1524 | <i>Prosopis ruscifolia</i> + <i>Aspidosperma quebracho-</i>                       | 1  | 1  |
| 1525 | <i>Prosopis ruscifolia</i> + <i>Aspidosperma quebracho-</i>                       | 1  | 1  |
| 1526 | <i>Prosopis ruscifolia</i> + <i>Bougainvillea praecox</i> + <i>Aspidosperma</i>   | 1  | 1  |
| 1527 | <i>Prosopis ruscifolia</i> + <i>Celtis chichape</i>                               | 1  | 1  |
| 1528 | <i>Prosopis ruscifolia</i> + <i>Copernicia alba</i>                               | 3  | 3  |
| 1529 | <i>Prosopis ruscifolia</i> + <i>Cordia americana</i> + <i>Prosopis kuntzei</i>    | 1  | 1  |
| 1530 | <i>Prosopis ruscifolia</i> + <i>Cordia americana</i> + <i>Salta</i>               | 1  | 1  |
| 1531 | <i>Prosopis ruscifolia</i> + <i>Cordia americana</i> + <i>Schinopsis</i>          | 1  | 1  |
| 1532 | <i>Prosopis ruscifolia</i> + <i>Cynophalla retusa</i>                             | 3  | 3  |
| 1533 | <i>Prosopis ruscifolia</i> + <i>Cynophalla retusa</i> + <i>Prosopis kuntzei</i>   | 1  | 1  |
| 1534 | <i>Prosopis ruscifolia</i> + <i>Cynophalla retusa</i> + <i>Prosopis nigra</i>     | 1  | 1  |
| 1535 | <i>Prosopis ruscifolia</i> + <i>Cynophalla retusa</i> + <i>Prosopis</i>           | 1  | 1  |
| 1536 | <i>Prosopis ruscifolia</i> + <i>Geoffroea decorticans</i>                         | 3  | 3  |
| 1537 | <i>Prosopis ruscifolia</i> + <i>Geoffroea decorticans</i> + <i>Sarcomphalus</i>   | 1  | 1  |
| 1538 | <i>Prosopis ruscifolia</i> + <i>Gonopterodendron sarmientoi</i>                   | 1  | 1  |
| 1539 | <i>Prosopis ruscifolia</i> + <i>Libidibia</i>                                     | 1  | 1  |
| 1540 | <i>Prosopis ruscifolia</i> + <i>Mimozgyanthus carinatus</i>                       | 1  | 1  |
| 1541 | <i>Prosopis ruscifolia</i> + <i>Parkinsonia praecox</i>                           | 3  | 3  |
| 1542 | <i>Prosopis ruscifolia</i> + <i>Phyllostylon rhamnoides</i> + <i>Diplokeleba</i>  | 1  | 1  |
| 1543 | <i>Prosopis ruscifolia</i> + <i>Prosopis nigra</i>                                | 5  | 5  |
| 1544 | <i>Prosopis ruscifolia</i> + <i>Prosopis nigra</i> + <i>Geoffroea</i>             | 1  | 1  |
| 1545 | <i>Prosopis ruscifolia</i> + <i>Prosopis nigra</i> + <i>Parkinsonia praecox</i>   | 1  | 1  |
| 1546 | <i>Prosopis ruscifolia</i> + <i>Prosopis nigra</i> + <i>Sarcomphalus mistol</i>   | 1  | 1  |
| 1547 | <i>Prosopis ruscifolia</i> + <i>Prosopis nigra</i> + <i>Vachellia caven</i>       | 1  | 1  |
| 1548 | <i>Prosopis ruscifolia</i> + <i>Prosopis vinalillo</i> + <i>Geoffroea</i>         | 1  | 1  |
| 1549 | <i>Prosopis ruscifolia</i> + <i>Salta triflora</i>                                | 1  | 1  |
| 1550 | <i>Prosopis ruscifolia</i> + <i>Salta triflora</i> + <i>Schinopsis lorentzii</i>  | 1  | 1  |

|                            |                                                                                   |   |   |   |   |
|----------------------------|-----------------------------------------------------------------------------------|---|---|---|---|
| 1551                       | <i>Prosopis ruscifolia</i> + <i>Sarcomphalus mistol</i>                           |   |   | 8 | 8 |
| 1552                       | <i>Prosopis ruscifolia</i> + <i>Sarcomphalus mistol</i> + <i>Aspidosperma</i>     |   |   | 2 | 2 |
| 1553                       | <i>Prosopis ruscifolia</i> + <i>Sarcomphalus mistol</i> + <i>Mimozyanthus</i>     |   |   | 1 | 1 |
| 1554                       | <i>Prosopis ruscifolia</i> + <i>Sarcomphalus mistol</i> + <i>Prosopis nigra</i>   |   |   | 1 | 1 |
| 1555                       | <i>Prosopis ruscifolia</i> + <i>Sarcomphalus mistol</i> + <i>Schinopsis</i>       |   |   | 1 | 1 |
| 1556                       | <i>Prosopis ruscifolia</i> + <i>Sarcomphalus mistol</i> + <i>Trithrinax</i>       |   |   | 1 | 1 |
| 1557                       | <i>Prosopis ruscifolia</i> + <i>Schinopsis balansae</i>                           |   |   | 1 | 1 |
| 1558                       | <i>Prosopis ruscifolia</i> + <i>Schinopsis lorentzii</i> + <i>Prosopis alba</i>   |   |   | 1 | 1 |
| 1559                       | <i>Prosopis ruscifolia</i> + <i>Schinopsis lorentzii</i> + <i>Vallesia glabra</i> |   |   | 1 | 1 |
| 1560                       | <i>Prosopis ruscifolia</i> + <i>Senegalia praecox</i> + <i>Aspidosperma</i>       |   |   | 1 | 1 |
| 1561                       | <i>Prosopis ruscifolia</i> + <i>Senegalia praecox</i> + <i>Prosopis kuntzei</i>   |   |   | 1 | 1 |
| 1562                       | <i>Prosopis ruscifolia</i> + <i>Senegalia praecox</i> + <i>Prosopis nigra</i>     |   |   | 1 | 1 |
| 1563                       | <i>Prosopis ruscifolia</i> + <i>Sideroxylon</i>                                   |   |   | 1 | 1 |
| 1564                       | <i>Prosopis ruscifolia</i> + <i>Sideroxylon obtusifolium</i> + <i>Senegalia</i>   |   |   | 1 | 1 |
| 1565                       | <i>Prosopis ruscifolia</i> + <i>Tabebuia nodosa</i>                               |   |   | 6 | 6 |
| 1566                       | <i>Prosopis ruscifolia</i> + <i>Tabebuia nodosa</i> + <i>Achatocarpus</i>         |   |   | 1 | 1 |
| 1567                       | <i>Prosopis ruscifolia</i> + <i>Tabebuia nodosa</i> + <i>Aspidosperma</i>         |   |   | 1 | 1 |
| 1568                       | <i>Prosopis ruscifolia</i> + <i>Tabebuia nodosa</i> + <i>Salta triflora</i>       |   |   | 1 | 1 |
| 1569                       | <i>Prosopis ruscifolia</i> + <i>Tabebuia nodosa</i> + <i>Sarcomphalus mistol</i>  |   |   | 1 | 1 |
| 1570                       | <i>Prosopis ruscifolia</i> + <i>Trichilia catigua</i> + <i>Bougainvillea</i>      |   |   | 1 | 1 |
| 1571                       | <i>Prosopis ruscifolia</i> + <i>Trichilia catigua</i> + <i>Sideroxylon</i>        |   |   | 1 | 1 |
| 1572                       | <i>Prosopis ruscifolia</i> + <i>Trithrinax schizophylla</i> var.                  |   |   | 1 | 1 |
| 1573                       | <i>Prosopis ruscifolia</i> + <i>Trithrinax schizophylla</i> var.                  |   |   | 1 | 1 |
| 1574                       | <i>Prosopis ruscifolia</i> + <i>Vachellia caven</i>                               |   |   | 2 | 2 |
| 1575                       | <i>Prosopis ruscifolia</i> + <i>Vallesia glabra</i>                               |   |   | 1 | 1 |
| 1576                       | <i>Prosopis torquata</i>                                                          | 1 | 1 | 5 | 7 |
| 1577                       | <i>Prosopis torquata</i> + <i>Aspidosperma quebracho-blanco</i>                   |   |   | 1 | 1 |
| 1578                       | <i>Prosopis torquata</i> + <i>Aspidosperma quebracho-blanco</i> + <i>Celtis</i>   |   |   | 1 | 1 |
| 1579                       | <i>Prosopis torquata</i> + <i>Parkinsonia praecox</i> + <i>Prosopis nigra</i>     |   |   | 1 | 1 |
| 1580                       | <i>Prosopis torquata</i> + <i>Prosopis flexuosa</i>                               |   |   | 2 | 2 |
| 1581                       | <i>Prosopis torquata</i> + <i>Prosopis nigra</i>                                  |   |   | 2 | 2 |
| 1582                       | <i>Prosopis torquata</i> + <i>Senegalia gilliesii</i> + <i>Aspidosperma</i>       |   |   | 1 | 1 |
| 1583                       | <i>Prosopis vinalillo</i> + <i>Prosopis nigra</i>                                 |   |   | 1 | 1 |
| 1584                       | <i>Schinus fasciculatus</i> + <i>Prosopis flexuosa</i>                            | 1 |   |   | 1 |
| 1585                       | <i>Scutia buxifolia</i> + <i>Prosopis nigra</i>                                   | 1 |   |   | 1 |
| 1586                       | <i>Scutia buxifolia</i> + <i>Prosopis nigra</i> + <i>Vachellia</i>                | 1 |   |   | 1 |
| 1587                       | <i>Tessaria integrifolia</i> + <i>Prosopis nigra</i>                              |   |   | 1 | 1 |
| 1588                       | <i>Tessaria integrifolia</i> + <i>Vachellia aroma</i> + <i>Prosopis nigra</i>     |   |   | 1 | 1 |
| 1589                       | <i>Vachellia caven</i>                                                            |   | 1 |   | 1 |
| <b>Prunus + others</b>     |                                                                                   |   |   |   |   |
| 1590                       | <i>Ilex brevicuspis</i> + <i>Ocotea puberula</i> + <i>Aiouea amoena</i>           |   |   | 1 | 1 |
| 1591                       | <i>Ilex brevicuspis</i> + <i>Parapiptadenia rigida</i> + <i>Prunus</i>            |   |   | 1 | 1 |
| 1592                       | <i>Prunus brasiliensis</i>                                                        |   |   | 1 | 1 |
| 1593                       | <i>Prunus brasiliensis</i> + <i>Machaerium stipitatum</i>                         |   |   | 1 | 1 |
| 1594                       | <i>Prunus brasiliensis</i> + <i>Nectandra angustifolia</i> + <i>Bastardiopsis</i> |   |   | 1 | 1 |
| 1595                       | <i>Prunus brasiliensis</i> + <i>Symplocos uniflora</i> + <i>Schinus</i>           |   |   | 1 | 1 |
| 1596                       | <i>Prunus brasiliensis</i> + <i>Vitex megapotamica</i> + <i>Ruprechtia</i>        |   |   | 1 | 1 |
| 1597                       | <i>Prunus subcoriacea</i> + <i>Luehea divaricata</i>                              |   |   | 1 | 1 |
| <b>Rhamnaceae + others</b> |                                                                                   |   |   |   |   |
| 1598                       | <i>Condalia buxifolia</i>                                                         |   |   | 1 | 1 |
| 1599                       | <i>Condalia buxifolia</i> + <i>Geoffroea decorticans</i>                          |   |   | 1 | 1 |
| 1600                       | <i>Condalia buxifolia</i> + <i>Myrcianthes cisplatensis</i> + <i>Lithraea</i>     |   |   | 1 | 1 |
| 1601                       | <i>Condalia buxifolia</i> + <i>Ruprechtia apetala</i> + <i>Senegalia praecox</i>  |   |   | 1 | 1 |
| 1602                       | <i>Condalia buxifolia</i> + <i>Sapium haematospermum</i>                          |   |   | 1 | 1 |
| 1603                       | <i>Condalia microphylla</i> + <i>Celtis ehrenbergiana</i> + <i>Vachellia</i>      |   |   | 1 | 1 |
| <b>Rubiaceae + others</b>  |                                                                                   |   |   |   |   |
| 1604                       | <i>Coutarea hexandra</i>                                                          |   |   |   | 1 |



**Salicaceae + others**

|      |                                                           |   |   |   |
|------|-----------------------------------------------------------|---|---|---|
| 1605 | <i>Salix humboldtiana</i>                                 | 4 |   | 4 |
| 1606 | <i>Salix humboldtiana</i> + <i>Celtis ehrenbergiana</i>   |   | 1 | 1 |
| 1607 | <i>Salix humboldtiana</i> + <i>Nectandra angustifolia</i> | 1 |   | 1 |

**Sapindaceae + others**

|      |                                                                                    |  |   |   |   |
|------|------------------------------------------------------------------------------------|--|---|---|---|
| 1608 | <i>Allophylus edulis</i>                                                           |  |   | 1 | 1 |
| 1609 | <i>Allophylus edulis</i> + <i>Achatocarpus praecox</i> + <i>Sarcomphalus</i>       |  | 1 |   | 1 |
| 1610 | <i>Allophylus edulis</i> + <i>Campomanesia xanthocarpa</i>                         |  |   | 1 | 1 |
| 1611 | <i>Allophylus edulis</i> + <i>Erythroxylum argentinum</i>                          |  |   |   | 1 |
| 1612 | <i>Allophylus edulis</i> + <i>Myrcianthes pungens</i> + <i>Myrsine</i>             |  |   |   | 1 |
| 1613 | <i>Allophylus edulis</i> + <i>Parapiptadenia excelsa</i> + <i>Duranta</i>          |  | 1 |   | 1 |
| 1614 | <i>Allophylus edulis</i> + <i>Sarcomphalus mistol</i> + <i>Enterolobium</i>        |  | 1 |   | 1 |
| 1615 | <i>Allophylus edulis</i> + <i>Vassobia breviflora</i>                              |  |   |   | 1 |
| 1616 | <i>Athyana weinmanniifolia</i> + <i>Ceiba chodatii</i> + <i>Parapiptadenia</i>     |  |   |   | 1 |
| 1617 | <i>Athyana weinmanniifolia</i> + <i>Schinopsis lorentzii</i> + <i>Agonandra</i>    |  |   |   | 1 |
| 1618 | <i>Cupania vernalis</i> + <i>Croton piluliferus</i> + <i>Handroanthus</i>          |  |   |   | 1 |
| 1619 | <i>Cupania vernalis</i> + <i>Holocalyx balansae</i> + <i>Matayba</i>               |  |   | 1 | 1 |
| 1620 | <i>Cupania vernalis</i> + <i>Prunus brasiliensis</i> + <i>Fagara chiloperone</i>   |  |   | 1 | 1 |
| 1621 | <i>Cupania vernalis</i> + <i>Solanum riparium</i>                                  |  |   |   | 1 |
| 1622 | <i>Diatenopteryx sorbifolia</i> + <i>Anadenanthera</i>                             |  |   |   | 1 |
| 1623 | <i>Diatenopteryx sorbifolia</i> + <i>Cordia</i>                                    |  |   | 1 | 1 |
| 1624 | <i>Diatenopteryx sorbifolia</i> + <i>Machaerium stipitatum</i> + <i>Cupania</i>    |  |   | 1 | 1 |
| 1625 | <i>Diatenopteryx sorbifolia</i> + <i>Nectandra angustifolia</i> + <i>Muelleria</i> |  |   | 2 | 2 |
| 1626 | <i>Diatenopteryx sorbifolia</i> + <i>Parapiptadenia</i>                            |  |   | 1 | 1 |
| 1627 | <i>Diplokeleba floribunda</i> + <i>Gleditsia</i>                                   |  | 1 |   | 1 |
| 1628 | <i>Diplokeleba floribunda</i> + <i>Phyllostylon</i>                                |  | 1 |   | 1 |
| 1629 | <i>Diplokeleba floribunda</i> + <i>Pisonia zapallo</i> + <i>Phyllostylon</i>       |  | 1 |   | 1 |
| 1630 | <i>Diplokeleba floribunda</i> + <i>Ruprechtia laxiflora</i> + <i>Scutia</i>        |  | 1 |   | 1 |
| 1631 | <i>Diplokeleba floribunda</i> + <i>Senegalia praecox</i> + <i>Phyllostylon</i>     |  | 1 |   | 1 |
| 1632 | <i>Diplokeleba floribunda</i> + <i>Zanthoxylum</i>                                 |  | 1 |   | 1 |
| 1633 | <i>Matayba elaeagnoides</i> + <i>Nectandra lanceolata</i> + <i>Prunus</i>          |  |   | 1 | 1 |
| 1634 | <i>Matayba elaeagnoides</i> + <i>Symplocos uniflora</i> + <i>Nectandra</i>         |  |   | 1 | 1 |
| 1635 | <i>Sapindus saponaria</i> + <i>Cordia americana</i> + <i>Diplokeleba</i>           |  | 1 |   | 1 |

**Sapotaceae + others**

|      |                                                                                   |  |   |   |   |   |
|------|-----------------------------------------------------------------------------------|--|---|---|---|---|
| 1636 | <i>Aralia warmingiana</i> + <i>Chrysophyllum marginatum</i> + <i>Maclura</i>      |  |   | 1 |   | 1 |
| 1637 | <i>Chrysophyllum gonocarpum</i> + <i>Bastardiopsis</i>                            |  |   | 1 |   | 1 |
| 1638 | <i>Chrysophyllum gonocarpum</i> + <i>Jacaratia spinosa</i> + <i>Apuleia</i>       |  |   | 1 |   | 1 |
| 1639 | <i>Chrysophyllum gonocarpum</i> + <i>Ocotea</i>                                   |  |   |   | 1 | 1 |
| 1640 | <i>Chrysophyllum gonocarpum</i> + <i>Prunus</i>                                   |  |   | 1 |   | 1 |
| 1641 | <i>Chrysophyllum marginatum</i> + <i>Bastardiopsis</i>                            |  |   | 1 |   | 1 |
| 1642 | <i>Chrysophyllum marginatum</i> + <i>Nectandra</i>                                |  |   | 1 |   | 1 |
| 1643 | <i>Pouteria salicifolia</i> + <i>Terminalia triflora</i>                          |  |   | 1 |   | 1 |
| 1644 | <i>Sideroxylon obtusifolium</i>                                                   |  |   |   | 1 | 1 |
| 1645 | <i>Sideroxylon obtusifolium</i> + <i>Aspidosperma quebracho-</i>                  |  | 1 |   |   | 1 |
| 1646 | <i>Sideroxylon obtusifolium</i> + <i>Aspidosperma quebracho-</i>                  |  | 1 |   |   | 1 |
| 1647 | <i>Sideroxylon obtusifolium</i> + <i>Copernicia alba</i> + <i>Scutia</i>          |  | 1 |   |   | 1 |
| 1648 | <i>Sideroxylon obtusifolium</i> + <i>Geoffroea decorticans</i>                    |  | 1 |   |   | 1 |
| 1649 | <i>Sideroxylon obtusifolium</i> + <i>Gleditsia</i>                                |  | 1 |   |   | 1 |
| 1650 | <i>Sideroxylon obtusifolium</i> + <i>Gleditsia amorphoides</i> + <i>Pisonia</i>   |  | 1 |   |   | 1 |
| 1651 | <i>Sideroxylon obtusifolium</i> + <i>Libidibia paraguariensis</i>                 |  | 1 |   |   | 1 |
| 1652 | <i>Sideroxylon obtusifolium</i> + <i>Libidibia paraguariensis</i> + <i>Cordia</i> |  | 1 |   |   | 1 |
| 1653 | <i>Sideroxylon obtusifolium</i> + <i>Libidibia</i>                                |  | 1 |   |   | 1 |
| 1654 | <i>Sideroxylon obtusifolium</i> + <i>Nectandra angustifolia</i> + <i>Luehea</i>   |  |   | 1 |   | 1 |
| 1655 | <i>Sideroxylon obtusifolium</i> + <i>Parkinsonia praecox</i> + <i>Prosopis</i>    |  | 1 |   |   | 1 |
| 1656 | <i>Sideroxylon obtusifolium</i> + <i>Phyllostylon</i>                             |  | 1 |   |   | 1 |
| 1657 | <i>Sideroxylon obtusifolium</i> + <i>Pisonia zapallo</i> + <i>Ceiba chodatii</i>  |  | 1 |   |   | 1 |
| 1658 | <i>Sideroxylon obtusifolium</i> + <i>Prosopis</i>                                 |  | 1 |   |   | 1 |

|                                            |                                                                                  |    |    |
|--------------------------------------------|----------------------------------------------------------------------------------|----|----|
| 1659                                       | <i>Sideroxylon obtusifolium</i> + <i>Prosopis kuntzei</i> + <i>Sarcomphalus</i>  | 1  | 1  |
| 1660                                       | <i>Sideroxylon obtusifolium</i> + <i>Prosopis kuntzei</i> + <i>Schinopsis</i>    | 1  | 1  |
| 1661                                       | <i>Sideroxylon obtusifolium</i> + <i>Salta triflora</i>                          | 1  | 1  |
| 1662                                       | <i>Sideroxylon obtusifolium</i> + <i>Salta triflora</i> + <i>Aspidosperma</i>    | 1  | 1  |
| 1663                                       | <i>Sideroxylon obtusifolium</i> + <i>Salta triflora</i> + <i>Ceiba</i>           | 1  | 1  |
| 1664                                       | <i>Sideroxylon obtusifolium</i> + <i>Salta triflora</i> + <i>Schinopsis</i>      | 3  | 3  |
| 1665                                       | <i>Sideroxylon obtusifolium</i> + <i>Sarcomphalus mistol</i>                     | 1  | 1  |
| 1666                                       | <i>Sideroxylon obtusifolium</i> + <i>Schinopsis balansae</i> + <i>Cynophalla</i> | 1  | 1  |
| 1667                                       | <i>Sideroxylon obtusifolium</i> + <i>Schinopsis</i>                              | 1  | 1  |
| 1668                                       | <i>Sideroxylon obtusifolium</i> + <i>Senegalia praecox</i>                       | 2  | 2  |
| 1669                                       | <i>Sideroxylon obtusifolium</i> + <i>Senegalia praecox</i> + <i>Celtis</i>       | 1  | 1  |
| 1670                                       | <i>Sideroxylon obtusifolium</i> + <i>Senegalia praecox</i> + <i>Salta</i>        |    | 1  |
| 1671                                       | <i>Sideroxylon obtusifolium</i> + <i>Senegalia praecox</i> + <i>Ximenia</i>      | 1  | 1  |
| 1672                                       | <i>Sideroxylon obtusifolium</i> + <i>Tabebuia nodosa</i> + <i>Senegalia</i>      | 1  | 1  |
| 1673                                       | <i>Sideroxylon obtusifolium</i> + <i>Trithrinax schizophylla</i> var.            | 1  | 1  |
| <b><i>Sarcomphalus mistol</i> + others</b> |                                                                                  |    |    |
| 1674                                       | <i>Bougainvillea praecox</i> + <i>Sarcomphalus</i>                               | 1  | 1  |
| 1675                                       | <i>Sarcomphalus mistol</i>                                                       | 16 | 16 |
| 1676                                       | <i>Sarcomphalus mistol</i> + <i>Achatocarpus praecox</i> + <i>Schinopsis</i>     | 1  | 1  |
| 1677                                       | <i>Sarcomphalus mistol</i> + <i>Anisocapparis</i>                                | 1  | 1  |
| 1678                                       | <i>Sarcomphalus mistol</i> + <i>Anisocapparis speciosa</i> + <i>Prosopis</i>     | 1  | 1  |
| 1679                                       | <i>Sarcomphalus mistol</i> + <i>Aspidosperma quebracho-</i>                      | 1  | 1  |
| 1680                                       | <i>Sarcomphalus mistol</i> + <i>Aspidosperma quebracho-</i>                      | 1  | 1  |
| 1681                                       | <i>Sarcomphalus mistol</i> + <i>Aspidosperma quebracho-</i>                      | 1  | 1  |
| 1682                                       | <i>Sarcomphalus mistol</i> + <i>Aspidosperma quebracho-</i>                      | 2  | 2  |
| 1683                                       | <i>Sarcomphalus mistol</i> + <i>Aspidosperma quebracho-</i>                      | 1  | 1  |
| 1684                                       | <i>Sarcomphalus mistol</i> + <i>Aspidosperma quebracho-</i>                      | 5  | 5  |
| 1685                                       | <i>Sarcomphalus mistol</i> + <i>Aspidosperma quebracho-</i>                      | 1  | 1  |
| 1686                                       | <i>Sarcomphalus mistol</i> + <i>Aspidosperma quebracho-</i>                      | 15 | 15 |
| 1687                                       | <i>Sarcomphalus mistol</i> + <i>Aspidosperma quebracho-</i>                      | 1  | 1  |
| 1688                                       | <i>Sarcomphalus mistol</i> + <i>Aspidosperma quebracho-</i>                      | 1  | 1  |
| 1689                                       | <i>Sarcomphalus mistol</i> + <i>Aspidosperma quebracho-</i>                      | 1  | 1  |
| 1690                                       | <i>Sarcomphalus mistol</i> + <i>Aspidosperma quebracho-</i>                      | 1  | 1  |
| 1691                                       | <i>Sarcomphalus mistol</i> + <i>Aspidosperma quebracho-</i>                      | 1  | 1  |
| 1692                                       | <i>Sarcomphalus mistol</i> + <i>Aspidosperma quebracho-</i>                      | 4  | 4  |
| 1693                                       | <i>Sarcomphalus mistol</i> + <i>Aspidosperma quebracho-</i>                      | 1  | 1  |
| 1694                                       | <i>Sarcomphalus mistol</i> + <i>Aspidosperma quebracho-</i>                      | 1  | 1  |
| 1695                                       | <i>Sarcomphalus mistol</i> + <i>Bougainvillea campanulata</i>                    | 1  | 1  |
| 1696                                       | <i>Sarcomphalus mistol</i> + <i>Bougainvillea</i>                                | 1  | 1  |
| 1697                                       | <i>Sarcomphalus mistol</i> + <i>Bougainvillea stipitata</i>                      | 1  | 1  |
| 1698                                       | <i>Sarcomphalus mistol</i> + <i>Castela coccinea</i> + <i>Prosopis alba</i>      | 1  | 1  |
| 1699                                       | <i>Sarcomphalus mistol</i> + <i>Celtis iguanaea</i> + <i>Achatocarpus</i>        | 1  | 1  |
| 1700                                       | <i>Sarcomphalus mistol</i> + <i>Geoffroea decorticans</i>                        | 2  | 2  |
| 1701                                       | <i>Sarcomphalus mistol</i> + <i>Geoffroea</i>                                    | 1  | 1  |
| 1702                                       | <i>Sarcomphalus mistol</i> + <i>Gonopterodendron sarmientoi</i>                  | 2  | 2  |
| 1703                                       | <i>Sarcomphalus mistol</i> + <i>Gonopterodendron</i>                             | 1  | 1  |
| 1704                                       | <i>Sarcomphalus mistol</i> + <i>Gonopterodendron</i>                             | 1  | 1  |
| 1705                                       | <i>Sarcomphalus mistol</i> + <i>Gonopterodendron</i>                             | 1  | 1  |
| 1706                                       | <i>Sarcomphalus mistol</i> + <i>Handroanthus impetiginosus</i>                   | 1  | 1  |
| 1707                                       | <i>Sarcomphalus mistol</i> + <i>Libidibia paraguariensis</i>                     | 1  | 1  |
| 1708                                       | <i>Sarcomphalus mistol</i> + <i>Libidibia</i>                                    | 1  | 1  |
| 1709                                       | <i>Sarcomphalus mistol</i> + <i>Libidibia paraguariensis</i> + <i>Schinopsis</i> | 1  | 1  |
| 1710                                       | <i>Sarcomphalus mistol</i> + <i>Libidibia paraguariensis</i> + <i>Tabebuia</i>   | 1  | 1  |
| 1711                                       | <i>Sarcomphalus mistol</i> + <i>Maytenus vitis-idaea</i>                         | 1  | 1  |
| 1712                                       | <i>Sarcomphalus mistol</i> + <i>Parkinsonia praecox</i>                          | 1  | 1  |
| 1713                                       | <i>Sarcomphalus mistol</i> + <i>Parkinsonia praecox</i> + <i>Prosopis nigra</i>  | 2  | 2  |
| 1714                                       | <i>Sarcomphalus mistol</i> + <i>Parkinsonia praecox</i> + <i>Prosopis</i>        | 1  | 1  |

|      |                                                                                    |    |    |
|------|------------------------------------------------------------------------------------|----|----|
| 1715 | <i>Sarcomphalus mistol</i> + <i>Parkinsonia praecox</i> + <i>Salta triflora</i>    | 1  | 1  |
| 1716 | <i>Sarcomphalus mistol</i> + <i>Pisonia zapallo</i> + <i>Achatocarpus</i>          | 1  | 1  |
| 1717 | <i>Sarcomphalus mistol</i> + <i>Prosopis alba</i>                                  | 3  | 3  |
| 1718 | <i>Sarcomphalus mistol</i> + <i>Prosopis alba</i> + <i>Aspidosperma</i>            | 1  | 1  |
| 1719 | <i>Sarcomphalus mistol</i> + <i>Prosopis alba</i> + <i>Gonopterodendron</i>        | 1  | 1  |
| 1720 | <i>Sarcomphalus mistol</i> + <i>Prosopis alba</i> + <i>Prosopis</i>                | 1  | 1  |
| 1721 | <i>Sarcomphalus mistol</i> + <i>Prosopis alba</i> + <i>Senegalia</i>               | 1  | 1  |
| 1722 | <i>Sarcomphalus mistol</i> + <i>Prosopis elata</i>                                 | 1  | 1  |
| 1723 | <i>Sarcomphalus mistol</i> + <i>Prosopis elata</i> + <i>Salta triflora</i>         | 1  | 1  |
| 1724 | <i>Sarcomphalus mistol</i> + <i>Prosopis flexuosa</i> + <i>Aspidosperma</i>        | 1  | 1  |
| 1725 | <i>Sarcomphalus mistol</i> + <i>Prosopis kuntzei</i> + <i>Libidibia</i>            | 1  | 1  |
| 1726 | <i>Sarcomphalus mistol</i> + <i>Prosopis kuntzei</i> + <i>Schinopsis lorentzii</i> | 1  | 1  |
| 1727 | <i>Sarcomphalus mistol</i> + <i>Prosopis kuntzei</i> + <i>Senegalia praecox</i>    | 1  | 1  |
| 1728 | <i>Sarcomphalus mistol</i> + <i>Prosopis kuntzei</i> + <i>Senegalia</i>            | 1  | 1  |
| 1729 | <i>Sarcomphalus mistol</i> + <i>Prosopis nigra</i>                                 | 16 | 16 |
| 1730 | <i>Sarcomphalus mistol</i> + <i>Prosopis nigra</i> + <i>Aspidosperma</i>           | 3  | 3  |
| 1731 | <i>Sarcomphalus mistol</i> + <i>Prosopis nigra</i> + <i>Aspidosperma</i>           | 1  | 1  |
| 1732 | <i>Sarcomphalus mistol</i> + <i>Prosopis nigra</i> + <i>Aspidosperma</i>           | 1  | 1  |
| 1733 | <i>Sarcomphalus mistol</i> + <i>Prosopis nigra</i> + <i>Castela coccinea</i>       | 1  | 1  |
| 1734 | <i>Sarcomphalus mistol</i> + <i>Prosopis nigra</i> + <i>Cynophalla retusa</i>      | 1  | 1  |
| 1735 | <i>Sarcomphalus mistol</i> + <i>Prosopis nigra</i> + <i>Parkinsonia praecox</i>    | 1  | 1  |
| 1736 | <i>Sarcomphalus mistol</i> + <i>Prosopis nigra</i> + <i>Parkinsonia</i>            | 1  | 1  |
| 1737 | <i>Sarcomphalus mistol</i> + <i>Prosopis nigra</i> + <i>Schinopsis lorentzii</i>   | 2  | 2  |
| 1738 | <i>Sarcomphalus mistol</i> + <i>Prosopis nigra</i> + <i>Senegalia gilliesii</i>    | 1  | 1  |
| 1739 | <i>Sarcomphalus mistol</i> + <i>Prosopis nigra</i> + <i>Senegalia</i>              | 1  | 1  |
| 1740 | <i>Sarcomphalus mistol</i> + <i>Prosopis nigra</i> + <i>Sideroxylon</i>            | 1  | 1  |
| 1741 | <i>Sarcomphalus mistol</i> + <i>Prosopis nigra</i> + <i>Vachellia aroma</i>        | 2  | 2  |
| 1742 | <i>Sarcomphalus mistol</i> + <i>Prosopis ruscifolia</i>                            | 4  | 4  |
| 1743 | <i>Sarcomphalus mistol</i> + <i>Prosopis ruscifolia</i> + <i>Parkinsonia</i>       | 1  | 1  |
| 1744 | <i>Sarcomphalus mistol</i> + <i>Prosopis ruscifolia</i> + <i>Prosopis alba</i>     | 1  | 1  |
| 1745 | <i>Sarcomphalus mistol</i> + <i>Prosopis ruscifolia</i> + <i>Prosopis nigra</i>    | 1  | 1  |
| 1746 | <i>Sarcomphalus mistol</i> + <i>Prosopis ruscifolia</i> + <i>Sideroxylon</i>       | 1  | 1  |
| 1747 | <i>Sarcomphalus mistol</i> + <i>Prosopis torquata</i>                              | 1  | 1  |
| 1748 | <i>Sarcomphalus mistol</i> + <i>Ruprechtia apetala</i> + <i>Bougainvillea</i>      | 1  | 1  |
| 1749 | <i>Sarcomphalus mistol</i> + <i>Salta triflora</i>                                 | 3  | 3  |
| 1750 | <i>Sarcomphalus mistol</i> + <i>Salta triflora</i> + <i>Aspidosperma</i>           | 2  | 2  |
| 1751 | <i>Sarcomphalus mistol</i> + <i>Salta triflora</i> + <i>Aspidosperma</i>           | 2  | 2  |
| 1752 | <i>Sarcomphalus mistol</i> + <i>Salta triflora</i> + <i>Aspidosperma</i>           | 1  | 1  |
| 1753 | <i>Sarcomphalus mistol</i> + <i>Salta triflora</i> + <i>Gonopterodendron</i>       | 1  | 1  |
| 1754 | <i>Sarcomphalus mistol</i> + <i>Salta triflora</i> + <i>Libidibia</i>              | 3  | 3  |
| 1755 | <i>Sarcomphalus mistol</i> + <i>Salta triflora</i> + <i>Prosopis alba</i>          | 3  | 3  |
| 1756 | <i>Sarcomphalus mistol</i> + <i>Salta triflora</i> + <i>Pterogyne nitens</i>       | 1  | 1  |
| 1757 | <i>Sarcomphalus mistol</i> + <i>Salta triflora</i> + <i>Schinopsis lorentzii</i>   | 3  | 3  |
| 1758 | <i>Sarcomphalus mistol</i> + <i>Salta triflora</i> + <i>Schinopsis</i>             | 1  | 1  |
| 1759 | <i>Sarcomphalus mistol</i> + <i>Salta triflora</i> + <i>Schinopsis</i>             | 1  | 1  |
| 1760 | <i>Sarcomphalus mistol</i> + <i>Salta triflora</i> + <i>Senegalia praecox</i>      | 1  | 1  |
| 1761 | <i>Sarcomphalus mistol</i> + <i>Salta triflora</i> + <i>Tabebuia nodosa</i>        | 2  | 2  |
| 1762 | <i>Sarcomphalus mistol</i> + <i>Schinopsis lorentzii</i>                           | 25 | 25 |
| 1763 | <i>Sarcomphalus mistol</i> + <i>Schinopsis lorentzii</i> + <i>Aspidosperma</i>     | 10 | 10 |
| 1764 | <i>Sarcomphalus mistol</i> + <i>Schinopsis lorentzii</i> + <i>Aspidosperma</i>     | 1  | 1  |
| 1765 | <i>Sarcomphalus mistol</i> + <i>Schinopsis lorentzii</i> + <i>Ceiba</i>            | 1  | 1  |
| 1766 | <i>Sarcomphalus mistol</i> + <i>Schinopsis lorentzii</i> + <i>Libidibia</i>        | 1  | 1  |
| 1767 | <i>Sarcomphalus mistol</i> + <i>Schinopsis lorentzii</i> + <i>Salta triflora</i>   | 5  | 5  |
| 1768 | <i>Sarcomphalus mistol</i> + <i>Schinopsis lorentzii</i> + <i>Salta</i>            | 1  | 1  |
| 1769 | <i>Sarcomphalus mistol</i> + <i>Schinopsis lorentzii</i> + <i>Senegalia</i>        | 2  | 2  |
| 1770 | <i>Sarcomphalus mistol</i> + <i>Schinopsis lorentzii</i> + <i>Sideroxylon</i>      | 1  | 1  |
| 1771 | <i>Sarcomphalus mistol</i> + <i>Schinopsis lorentzii</i> + <i>Sideroxylon</i>      | 1  | 1  |

|                                          |                                                                                  |   |   |
|------------------------------------------|----------------------------------------------------------------------------------|---|---|
| 1772                                     | <i>Sarcomphalus mistol</i> + <i>Schinopsis lorentzii</i> + <i>Ximenia</i>        | 1 | 1 |
| 1773                                     | <i>Sarcomphalus mistol</i> + <i>Schinus longifolius</i>                          | 4 | 4 |
| 1774                                     | <i>Sarcomphalus mistol</i> + <i>Schinus longifolius</i> + <i>Aspidosperma</i>    | 1 | 1 |
| 1775                                     | <i>Sarcomphalus mistol</i> + <i>Senegalia gilliesii</i> + <i>Prosopis nigra</i>  | 2 | 2 |
| 1776                                     | <i>Sarcomphalus mistol</i> + <i>Senegalia gilliesii</i> + <i>Schinopsis</i>      | 2 | 2 |
| 1777                                     | <i>Sarcomphalus mistol</i> + <i>Senegalia praecox</i>                            | 4 | 4 |
| 1778                                     | <i>Sarcomphalus mistol</i> + <i>Senegalia praecox</i> + <i>Aspidosperma</i>      | 3 | 3 |
| 1779                                     | <i>Sarcomphalus mistol</i> + <i>Senegalia praecox</i> + <i>Cynophalla</i>        | 1 | 1 |
| 1780                                     | <i>Sarcomphalus mistol</i> + <i>Senegalia praecox</i> + <i>Prosopis kuntzei</i>  | 1 | 1 |
| 1781                                     | <i>Sarcomphalus mistol</i> + <i>Senegalia praecox</i> + <i>Prosopis nigra</i>    | 1 | 1 |
| 1782                                     | <i>Sarcomphalus mistol</i> + <i>Sideroxylon obtusifolium</i>                     | 2 | 2 |
| 1783                                     | <i>Sarcomphalus mistol</i> + <i>Sideroxylon obtusifolium</i> + <i>Schinopsis</i> | 1 | 1 |
| 1784                                     | <i>Sarcomphalus mistol</i> + <i>Sideroxylon obtusifolium</i> + <i>Schinopsis</i> | 1 | 1 |
| 1785                                     | <i>Sarcomphalus mistol</i> + <i>Tabebuia nodosa</i> + <i>Aspidosperma</i>        | 1 | 1 |
| 1786                                     | <i>Sarcomphalus mistol</i> + <i>Tabebuia nodosa</i> + <i>Gonopterodendron</i>    | 1 | 1 |
| 1787                                     | <i>Sarcomphalus mistol</i> + <i>Tabebuia nodosa</i> + <i>Prosopis nigra</i>      | 1 | 1 |
| 1788                                     | <i>Sarcomphalus mistol</i> + <i>Trithrinax schizophylla</i> var.                 | 1 | 1 |
| 1789                                     | <i>Sarcomphalus mistol</i> + <i>Trithrinax schizophylla</i> var.                 | 1 | 1 |
| 1790                                     | <i>Sarcomphalus mistol</i> + <i>Vachellia aroma</i>                              | 4 | 4 |
| 1791                                     | <i>Sarcomphalus mistol</i> + <i>Vachellia caven</i> + <i>Aspidosperma</i>        | 1 | 1 |
| 1792                                     | <i>Sarcomphalus mistol</i> + <i>Ximenia americana</i> + <i>Schinopsis</i>        | 1 | 1 |
| <b><i>Schinopsis</i> + <i>others</i></b> |                                                                                  |   |   |
| 1793                                     | <i>Achatocarpus praecox</i> + <i>Schinopsis balansae</i> + <i>Pisonia</i>        | 1 | 1 |
| 1794                                     | <i>Bougainvillea praecox</i> + <i>Schinopsis lorentzii</i> + <i>Sarcomphalus</i> | 1 | 1 |
| 1795                                     | <i>Maytenus viscifolia</i> + <i>Schinopsis lorentzii</i>                         | 1 | 1 |
| 1796                                     | <i>Schinopsis balansae</i>                                                       | 2 | 2 |
| 1797                                     | <i>Schinopsis balansae</i> + <i>Acanthosyris falcata</i> + <i>Cordia</i>         | 1 | 1 |
| 1798                                     | <i>Schinopsis balansae</i> + <i>Aspidosperma quebracho-blanco</i>                | 1 | 1 |
| 1799                                     | <i>Schinopsis balansae</i> + <i>Aspidosperma quebracho-</i>                      | 1 | 1 |
| 1800                                     | <i>Schinopsis balansae</i> + <i>Cordia americana</i> + <i>Anadenanthera</i>      |   | 1 |
| 1801                                     | <i>Schinopsis balansae</i> + <i>Cordia americana</i> + <i>Gleditsia</i>          | 1 | 1 |
| 1802                                     | <i>Schinopsis balansae</i> + <i>Cordia americana</i> + <i>Prosopis nigra</i>     | 1 | 1 |
| 1803                                     | <i>Schinopsis balansae</i> + <i>Gleditsia amorphoides</i> + <i>Myrcianthes</i>   | 1 | 1 |
| 1804                                     | <i>Schinopsis balansae</i> + <i>Gleditsia amorphoides</i> + <i>Prosopis alba</i> | 1 | 1 |
| 1805                                     | <i>Schinopsis balansae</i> + <i>Gleditsia amorphoides</i> + <i>Tabebuia</i>      | 1 | 1 |
| 1806                                     | <i>Schinopsis balansae</i> + <i>Libidibia paraguariensis</i>                     | 1 | 1 |
| 1807                                     | <i>Schinopsis balansae</i> + <i>Libidibia paraguariensis</i> + <i>Prosopis</i>   | 1 | 1 |
| 1808                                     | <i>Schinopsis balansae</i> + <i>Libidibia paraguariensis</i> + <i>Senegalia</i>  | 1 | 1 |
| 1809                                     | <i>Schinopsis balansae</i> + <i>Pisonia zapallo</i> + <i>Tabebuia</i>            | 1 | 1 |
| 1810                                     | <i>Schinopsis balansae</i> + <i>Prosopis affinis</i> + <i>Sideroxylon</i>        | 2 | 2 |
| 1811                                     | <i>Schinopsis balansae</i> + <i>Prosopis alba</i>                                | 2 | 2 |
| 1812                                     | <i>Schinopsis balansae</i> + <i>Prosopis alba</i> + <i>Diplokeleba</i>           | 1 | 1 |
| 1813                                     | <i>Schinopsis balansae</i> + <i>Prosopis alba</i> + <i>Myrcianthes</i>           | 1 | 1 |
| 1814                                     | <i>Schinopsis balansae</i> + <i>Prosopis alba</i> + <i>Senegalia praecox</i>     | 1 | 1 |
| 1815                                     | <i>Schinopsis balansae</i> + <i>Prosopis kuntzei</i>                             | 2 | 2 |
| 1816                                     | <i>Schinopsis balansae</i> + <i>Prosopis nigra</i>                               | 1 | 1 |
| 1817                                     | <i>Schinopsis balansae</i> + <i>Prosopis nigra</i> + <i>Diplokeleba</i>          | 1 | 1 |
| 1818                                     | <i>Schinopsis balansae</i> + <i>Prosopis nigra</i> + <i>Prosopis kuntzei</i>     | 1 | 1 |
| 1819                                     | <i>Schinopsis balansae</i> + <i>Prosopis nigra</i> + <i>Ruprechtia laxiflora</i> | 1 | 1 |
| 1820                                     | <i>Schinopsis balansae</i> + <i>Ruprechtia laxiflora</i>                         | 1 | 1 |
| 1821                                     | <i>Schinopsis balansae</i> + <i>Ruprechtia laxiflora</i> + <i>Cordia</i>         | 1 | 1 |
| 1822                                     | <i>Schinopsis balansae</i> + <i>Ruprechtia laxiflora</i> + <i>Prosopis alba</i>  | 1 | 1 |
| 1823                                     | <i>Schinopsis balansae</i> + <i>Sarcomphalus mistol</i>                          | 1 | 1 |
| 1824                                     | <i>Schinopsis balansae</i> + <i>Sarcomphalus mistol</i> + <i>Prosopis</i>        | 1 | 1 |
| 1825                                     | <i>Schinopsis balansae</i> + <i>Sarcomphalus mistol</i> + <i>Prosopis</i>        | 1 | 1 |
| 1826                                     | <i>Schinopsis balansae</i> + <i>Schinus fasciculatus</i> + <i>Achatocarpus</i>   | 1 | 1 |
| 1827                                     | <i>Schinopsis balansae</i> + <i>Senegalia praecox</i>                            | 1 | 1 |

|      |                                                                                    |    |      |
|------|------------------------------------------------------------------------------------|----|------|
| 1828 | <i>Schinopsis balansae</i> + <i>Senegalia praecox</i> + <i>Ceiba chodatii</i>      | 1  | 1    |
| 1829 | <i>Schinopsis balansae</i> + <i>Senegalia praecox</i> + <i>Cordia</i>              | 1  | 1    |
| 1830 | <i>Schinopsis balansae</i> + <i>Senegalia praecox</i> + <i>Cordia</i>              | 1  | 1    |
| 1831 | <i>Schinopsis balansae</i> + <i>Senegalia praecox</i> + <i>Cordia</i>              | 1  | 1    |
| 1832 | <i>Schinopsis balansae</i> + <i>Senegalia praecox</i> + <i>Pisonia zapallo</i>     | 1  | 1    |
| 1833 | <i>Schinopsis balansae</i> + <i>Senegalia praecox</i> + <i>Schinus</i>             | 1  | 1    |
| 1834 | <i>Schinopsis balansae</i> + <i>Senegalia praecox</i> + <i>Trithrinax</i>          | 1  | 1    |
| 1835 | <i>Schinopsis balansae</i> + <i>Sideroxylon obtusifolium</i>                       | 1  | 1    |
| 1836 | <i>Schinopsis balansae</i> + <i>Sideroxylon obtusifolium</i> + <i>Cordia</i>       | 1  | 1    |
| 1837 | <i>Schinopsis balansae</i> + <i>Tabebuia nodosa</i>                                | 2  | 2    |
| 1838 | <i>Schinopsis balansae</i> + <i>Tabebuia nodosa</i> + <i>Prosopis nigra</i>        | 1  | 1    |
| 1839 | <i>Schinopsis balansae</i> + <i>Tabebuia nodosa</i> + <i>Ruprechtia</i>            | 1  | 1    |
| 1840 | <i>Schinopsis balansae</i> + <i>Tabebuia nodosa</i> + <i>Salta triflora</i>        | 1  | 1    |
| 1841 | <i>Schinopsis balansae</i> + <i>Tabebuia nodosa</i> + <i>Sarcomphalus</i>          | 1  | 1    |
| 1842 | <i>Schinopsis lorentzii</i>                                                        | 24 | 24   |
| 1843 | <i>Schinopsis lorentzii</i> + <i>Anadenanthera colubrina</i>                       | 1  | 1    |
| 1844 | <i>Schinopsis lorentzii</i> + <i>Anadenanthera</i>                                 |    | 1 1  |
| 1845 | <i>Schinopsis lorentzii</i> + <i>Anadenanthera colubrina</i> + <i>Salta</i>        |    | 1 1  |
| 1846 | <i>Schinopsis lorentzii</i> + <i>Aralia soratensis</i>                             |    | 1 1  |
| 1847 | <i>Schinopsis lorentzii</i> + <i>Aspidosperma quebracho-blanco</i>                 | 34 | 1 35 |
| 1848 | <i>Schinopsis lorentzii</i> + <i>Aspidosperma quebracho-</i>                       | 1  | 1    |
| 1849 | <i>Schinopsis lorentzii</i> + <i>Aspidosperma quebracho-</i>                       | 1  | 1    |
| 1850 | <i>Schinopsis lorentzii</i> + <i>Aspidosperma quebracho-</i>                       | 2  | 2    |
| 1851 | <i>Schinopsis lorentzii</i> + <i>Aspidosperma quebracho-</i>                       | 1  | 1    |
| 1852 | <i>Schinopsis lorentzii</i> + <i>Aspidosperma quebracho-</i>                       | 2  | 2    |
| 1853 | <i>Schinopsis lorentzii</i> + <i>Aspidosperma quebracho-</i>                       | 4  | 4    |
| 1854 | <i>Schinopsis lorentzii</i> + <i>Aspidosperma quebracho-</i>                       | 1  | 1    |
| 1855 | <i>Schinopsis lorentzii</i> + <i>Aspidosperma quebracho-</i>                       | 3  | 3    |
| 1856 | <i>Schinopsis lorentzii</i> + <i>Aspidosperma quebracho-</i>                       | 2  | 2    |
| 1857 | <i>Schinopsis lorentzii</i> + <i>Aspidosperma quebracho-</i>                       | 1  | 1    |
| 1858 | <i>Schinopsis lorentzii</i> + <i>Aspidosperma quebracho-</i>                       | 12 | 12   |
| 1859 | <i>Schinopsis lorentzii</i> + <i>Aspidosperma quebracho-</i>                       | 1  | 1    |
| 1860 | <i>Schinopsis lorentzii</i> + <i>Aspidosperma quebracho-</i>                       | 1  | 1    |
| 1861 | <i>Schinopsis lorentzii</i> + <i>Aspidosperma quebracho-</i>                       | 1  | 1    |
| 1862 | <i>Schinopsis lorentzii</i> + <i>Aspidosperma quebracho-</i>                       | 1  | 1    |
| 1863 | <i>Schinopsis lorentzii</i> + <i>Aspidosperma quebracho-</i>                       | 1  | 1    |
| 1864 | <i>Schinopsis lorentzii</i> + <i>Aspidosperma quebracho-</i>                       | 1  | 1    |
| 1865 | <i>Schinopsis lorentzii</i> + <i>Bougainvillea stipitata</i> + <i>Aspidosperma</i> | 1  | 1    |
| 1866 | <i>Schinopsis lorentzii</i> + <i>Ceiba chodatii</i> + <i>Blepharocalyx</i>         |    | 1 1  |
| 1867 | <i>Schinopsis lorentzii</i> + <i>Celtis ehrenbergiana</i> + <i>Geoffroea</i>       | 1  | 1    |
| 1868 | <i>Schinopsis lorentzii</i> + <i>Cordia americana</i> + <i>Senegalia praecox</i>   | 1  | 1    |
| 1869 | <i>Schinopsis lorentzii</i> + <i>Cybistax antisyphilitica</i> + <i>Ruprechtia</i>  | 1  | 1    |
| 1870 | <i>Schinopsis lorentzii</i> + <i>Cynophalla retusa</i> + <i>Sarcomphalus</i>       | 1  | 1    |
| 1871 | <i>Schinopsis lorentzii</i> + <i>Libidibia paraguariensis</i>                      | 5  | 1 6  |
| 1872 | <i>Schinopsis lorentzii</i> + <i>Libidibia</i>                                     | 2  | 2    |
| 1873 | <i>Schinopsis lorentzii</i> + <i>Libidibia</i>                                     | 1  | 1    |
| 1874 | <i>Schinopsis lorentzii</i> + <i>Libidibia paraguariensis</i> + <i>Ceiba</i>       | 1  | 1    |
| 1875 | <i>Schinopsis lorentzii</i> + <i>Libidibia paraguariensis</i> + <i>Ruprechtia</i>  | 1  | 1    |
| 1876 | <i>Schinopsis lorentzii</i> + <i>Libidibia</i>                                     | 1  | 1    |
| 1877 | <i>Schinopsis lorentzii</i> + <i>Maytenus viscifolia</i> + <i>Libidibia</i>        | 1  | 1    |
| 1878 | <i>Schinopsis lorentzii</i> + <i>Ocotea porphyria</i> + <i>Anadenanthera</i>       |    | 1 1  |
| 1879 | <i>Schinopsis lorentzii</i> + <i>Parapiptadenia excelsa</i>                        | 1  | 1 2  |
| 1880 | <i>Schinopsis lorentzii</i> + <i>Parapiptadenia excelsa</i> + <i>Gleditsia</i>     |    | 1 1  |
| 1881 | <i>Schinopsis lorentzii</i> + <i>Parapiptadenia excelsa</i> + <i>Tipuana</i>       |    | 1 1  |
| 1882 | <i>Schinopsis lorentzii</i> + <i>Parkinsonia praecox</i> + <i>Aspidosperma</i>     | 1  | 1    |
| 1883 | <i>Schinopsis lorentzii</i> + <i>Parkinsonia praecox</i> + <i>Senegalia</i>        | 1  | 1    |
| 1884 | <i>Schinopsis lorentzii</i> + <i>Parkinsonia praecox</i> + <i>Tabebuia</i>         | 1  | 1    |

|                                 |                                                                                    |    |    |
|---------------------------------|------------------------------------------------------------------------------------|----|----|
| 1885                            | <i>Schinopsis lorentzii</i> + <i>Phyllostylon</i>                                  | 1  | 1  |
| 1886                            | <i>Schinopsis lorentzii</i> + <i>Prosopis alba</i> + <i>Sarcomphalus mistol</i>    | 1  | 1  |
| 1887                            | <i>Schinopsis lorentzii</i> + <i>Prosopis kuntzei</i>                              | 1  | 1  |
| 1888                            | <i>Schinopsis lorentzii</i> + <i>Prosopis kuntzei</i> + <i>Aspidosperma</i>        | 1  | 1  |
| 1889                            | <i>Schinopsis lorentzii</i> + <i>Prosopis kuntzei</i> + <i>Sarcomphalus mistol</i> | 1  | 1  |
| 1890                            | <i>Schinopsis lorentzii</i> + <i>Prosopis nigra</i>                                | 2  | 2  |
| 1891                            | <i>Schinopsis lorentzii</i> + <i>Prosopis nigra</i> + <i>Aspidosperma</i>          | 2  | 2  |
| 1892                            | <i>Schinopsis lorentzii</i> + <i>Prosopis nigra</i> + <i>Parkinsonia praecox</i>   | 1  | 1  |
| 1893                            | <i>Schinopsis lorentzii</i> + <i>Prosopis torquata</i> + <i>Senegalia</i>          | 1  | 1  |
| 1894                            | <i>Schinopsis lorentzii</i> + <i>Ruprechtia apetala</i>                            | 1  | 1  |
| 1895                            | <i>Schinopsis lorentzii</i> + <i>Ruprechtia apetala</i> + <i>Achatocarpus</i>      | 1  | 1  |
| 1896                            | <i>Schinopsis lorentzii</i> + <i>Salta triflora</i>                                | 1  | 1  |
| 1897                            | <i>Schinopsis lorentzii</i> + <i>Salta triflora</i> + <i>Aspidosperma</i>          | 4  | 4  |
| 1898                            | <i>Schinopsis lorentzii</i> + <i>Salta triflora</i> + <i>Aspidosperma</i>          | 1  | 1  |
| 1899                            | <i>Schinopsis lorentzii</i> + <i>Salta triflora</i> + <i>Calycophyllum</i>         | 1  | 1  |
| 1900                            | <i>Schinopsis lorentzii</i> + <i>Salta triflora</i> + <i>Sarcomphalus mistol</i>   | 1  | 1  |
| 1901                            | <i>Schinopsis lorentzii</i> + <i>Salta triflora</i> + <i>Tabebuia nodosa</i>       | 2  | 2  |
| 1902                            | <i>Schinopsis lorentzii</i> + <i>Sarcomphalus mistol</i>                           | 18 | 18 |
| 1903                            | <i>Schinopsis lorentzii</i> + <i>Sarcomphalus mistol</i> + <i>Aspidosperma</i>     | 5  | 5  |
| 1904                            | <i>Schinopsis lorentzii</i> + <i>Sarcomphalus mistol</i> + <i>Aspidosperma</i>     | 2  | 2  |
| 1905                            | <i>Schinopsis lorentzii</i> + <i>Sarcomphalus mistol</i> + <i>Aspidosperma</i>     | 1  | 1  |
| 1906                            | <i>Schinopsis lorentzii</i> + <i>Sarcomphalus mistol</i> + <i>Aspidosperma</i>     | 1  | 1  |
| 1907                            | <i>Schinopsis lorentzii</i> + <i>Sarcomphalus mistol</i> + <i>Aspidosperma</i>     | 1  | 1  |
| 1908                            | <i>Schinopsis lorentzii</i> + <i>Sarcomphalus mistol</i> + <i>Bougainvillea</i>    | 1  | 1  |
| 1909                            | <i>Schinopsis lorentzii</i> + <i>Sarcomphalus mistol</i> + <i>Celtis iguanaea</i>  | 1  | 1  |
| 1910                            | <i>Schinopsis lorentzii</i> + <i>Sarcomphalus mistol</i> + <i>Libidibia</i>        | 1  | 1  |
| 1911                            | <i>Schinopsis lorentzii</i> + <i>Sarcomphalus mistol</i> + <i>Parkinsonia</i>      | 1  | 1  |
| 1912                            | <i>Schinopsis lorentzii</i> + <i>Sarcomphalus mistol</i> + <i>Prosopis nigra</i>   | 2  | 2  |
| 1913                            | <i>Schinopsis lorentzii</i> + <i>Sarcomphalus mistol</i> + <i>Prosopis</i>         | 1  | 1  |
| 1914                            | <i>Schinopsis lorentzii</i> + <i>Sarcomphalus mistol</i> + <i>Ruprechtia</i>       | 1  | 1  |
| 1915                            | <i>Schinopsis lorentzii</i> + <i>Sarcomphalus mistol</i> + <i>Salta triflora</i>   | 3  | 3  |
| 1916                            | <i>Schinopsis lorentzii</i> + <i>Sarcomphalus mistol</i> + <i>Sarcotoxium</i>      | 1  | 1  |
| 1917                            | <i>Schinopsis lorentzii</i> + <i>Sarcomphalus mistol</i> + <i>Senegalia</i>        | 1  | 1  |
| 1918                            | <i>Schinopsis lorentzii</i> + <i>Sarcomphalus mistol</i> + <i>Sideroxylon</i>      | 1  | 1  |
| 1919                            | <i>Schinopsis lorentzii</i> + <i>Sarcomphalus mistol</i> + <i>Tabebuia</i>         | 1  | 1  |
| 1920                            | <i>Schinopsis lorentzii</i> + <i>Sarcomphalus mistol</i> + <i>Tabebuia</i>         | 1  | 1  |
| 1921                            | <i>Schinopsis lorentzii</i> + <i>Sarcomphalus mistol</i> + <i>Tabebuia</i>         | 1  | 1  |
| 1922                            | <i>Schinopsis lorentzii</i> + <i>Schinus fasciculatus</i>                          | 1  | 1  |
| 1923                            | <i>Schinopsis lorentzii</i> + <i>Senegalia gilliesii</i>                           | 1  | 1  |
| 1924                            | <i>Schinopsis lorentzii</i> + <i>Senegalia gilliesii</i> + <i>Aspidosperma</i>     | 1  | 1  |
| 1925                            | <i>Schinopsis lorentzii</i> + <i>Senegalia praecox</i>                             | 3  | 3  |
| 1926                            | <i>Schinopsis lorentzii</i> + <i>Senegalia praecox</i> + <i>Aspidosperma</i>       | 1  | 1  |
| 1927                            | <i>Schinopsis lorentzii</i> + <i>Senegalia praecox</i> + <i>Libidibia</i>          | 1  | 1  |
| 1928                            | <i>Schinopsis lorentzii</i> + <i>Senegalia praecox</i> + <i>Prosopis</i>           | 1  | 1  |
| 1929                            | <i>Schinopsis lorentzii</i> + <i>Senegalia praecox</i> + <i>Salta triflora</i>     | 1  | 1  |
| 1930                            | <i>Schinopsis lorentzii</i> + <i>Sideroxylon</i>                                   | 1  | 1  |
| 1931                            | <i>Schinopsis lorentzii</i> + <i>Sideroxylon</i>                                   | 1  | 1  |
| 1932                            | <i>Schinopsis lorentzii</i> + <i>Sideroxylon</i>                                   | 1  | 1  |
| 1933                            | <i>Schinopsis lorentzii</i> + <i>Tabebuia nodosa</i>                               | 1  | 1  |
| 1934                            | <i>Schinopsis lorentzii</i> + <i>Tabebuia nodosa</i> + <i>Aspidosperma</i>         | 1  | 1  |
| 1935                            | <i>Schinopsis lorentzii</i> + <i>Tabebuia nodosa</i> + <i>Aspidosperma</i>         | 1  | 1  |
| 1936                            | <i>Schinopsis lorentzii</i> + <i>Tabebuia nodosa</i> + <i>Libidibia</i>            | 1  | 1  |
| 1937                            | <i>Schinopsis lorentzii</i> + <i>Terminalia triflora</i> + <i>Cordia</i>           | 1  | 1  |
| 1938                            | <i>Schinopsis lorentzii</i> + <i>Ximenia americana</i> + <i>Aspidosperma</i>       | 1  | 1  |
| <b>Tabebuia nodosa + others</b> |                                                                                    |    |    |
| 1939                            | <i>Tabebuia nodosa</i>                                                             | 10 | 10 |
| 1940                            | <i>Tabebuia nodosa</i> + <i>Acanthosyris falcata</i> + <i>Sarcomphalus</i>         | 1  | 1  |

|                             |                                                                                   |   |   |
|-----------------------------|-----------------------------------------------------------------------------------|---|---|
| 1941                        | <i>Tabebuia nodosa</i> + <i>Aspidosperma quebracho-</i>                           | 1 | 1 |
| 1942                        | <i>Tabebuia nodosa</i> + <i>Aspidosperma quebracho-</i>                           | 3 | 3 |
| 1943                        | <i>Tabebuia nodosa</i> + <i>Aspidosperma quebracho-</i>                           | 1 | 1 |
| 1944                        | <i>Tabebuia nodosa</i> + <i>Aspidosperma quebracho-</i>                           | 1 | 1 |
| 1945                        | <i>Tabebuia nodosa</i> + <i>Aspidosperma quebracho-</i>                           | 1 | 1 |
| 1946                        | <i>Tabebuia nodosa</i> + <i>Aspidosperma quebracho-blanco</i> + <i>Salta</i>      | 1 | 1 |
| 1947                        | <i>Tabebuia nodosa</i> + <i>Aspidosperma quebracho-blanco</i> + <i>Salta</i>      | 2 | 2 |
| 1948                        | <i>Tabebuia nodosa</i> + <i>Aspidosperma quebracho-</i>                           | 1 | 1 |
| 1949                        | <i>Tabebuia nodosa</i> + <i>Aspidosperma quebracho-</i>                           | 1 | 1 |
| 1950                        | <i>Tabebuia nodosa</i> + <i>Aspidosperma quebracho-</i>                           | 1 | 1 |
| 1951                        | <i>Tabebuia nodosa</i> + <i>Bougainvillea campanulata</i> + <i>Vachellia</i>      | 1 | 1 |
| 1952                        | <i>Tabebuia nodosa</i> + <i>Bougainvillea praecox</i> + <i>Aspidosperma</i>       | 1 | 1 |
| 1953                        | <i>Tabebuia nodosa</i> + <i>Calycophyllum multiflorum</i>                         | 1 | 1 |
| 1954                        | <i>Tabebuia nodosa</i> + <i>Copernicia alba</i>                                   | 1 | 1 |
| 1955                        | <i>Tabebuia nodosa</i> + <i>Copernicia alba</i> + <i>Cynophalla retusa</i>        | 1 | 1 |
| 1956                        | <i>Tabebuia nodosa</i> + <i>Copernicia alba</i> + <i>Geoffroea decorticans</i>    | 1 | 1 |
| 1957                        | <i>Tabebuia nodosa</i> + <i>Copernicia alba</i> + <i>Sideroxylon</i>              | 1 | 1 |
| 1958                        | <i>Tabebuia nodosa</i> + <i>Geoffroea decorticans</i>                             | 2 | 2 |
| 1959                        | <i>Tabebuia nodosa</i> + <i>Gonopterodendron sarmientoi</i>                       | 1 | 1 |
| 1960                        | <i>Tabebuia nodosa</i> + <i>Gonopterodendron sarmientoi</i> + <i>Salta</i>        | 1 | 1 |
| 1961                        | <i>Tabebuia nodosa</i> + <i>Gonopterodendron sarmientoi</i> + <i>Salta</i>        | 1 | 1 |
| 1962                        | <i>Tabebuia nodosa</i> + <i>Libidibia paraguariensis</i>                          | 2 | 2 |
| 1963                        | <i>Tabebuia nodosa</i> + <i>Libidibia paraguariensis</i> + <i>Prosopis alba</i>   | 1 | 1 |
| 1964                        | <i>Tabebuia nodosa</i> + <i>Libidibia paraguariensis</i> + <i>Sarcomphalus</i>    | 1 | 1 |
| 1965                        | <i>Tabebuia nodosa</i> + <i>Maytenus vitis-idaea</i> + <i>Prosopis ruscifolia</i> | 1 | 1 |
| 1966                        | <i>Tabebuia nodosa</i> + <i>Mimozyanthus carinatus</i>                            | 4 | 4 |
| 1967                        | <i>Tabebuia nodosa</i> + <i>Parkinsonia praecox</i>                               | 1 | 1 |
| 1968                        | <i>Tabebuia nodosa</i> + <i>Prosopis alba</i>                                     | 2 | 2 |
| 1969                        | <i>Tabebuia nodosa</i> + <i>Prosopis nigra</i>                                    | 3 | 3 |
| 1970                        | <i>Tabebuia nodosa</i> + <i>Prosopis nigra</i> + <i>Salta triflora</i>            | 1 | 1 |
| 1971                        | <i>Tabebuia nodosa</i> + <i>Prosopis nigra</i> + <i>Schinopsis balansae</i>       | 2 | 2 |
| 1972                        | <i>Tabebuia nodosa</i> + <i>Prosopis ruscifolia</i>                               | 8 | 8 |
| 1973                        | <i>Tabebuia nodosa</i> + <i>Prosopis ruscifolia</i> + <i>Cynophalla</i>           | 1 | 1 |
| 1974                        | <i>Tabebuia nodosa</i> + <i>Prosopis ruscifolia</i> + <i>Gonopterodendron</i>     | 1 | 1 |
| 1975                        | <i>Tabebuia nodosa</i> + <i>Prosopis ruscifolia</i> + <i>Prosopis nigra</i>       | 1 | 1 |
| 1976                        | <i>Tabebuia nodosa</i> + <i>Prosopis ruscifolia</i> + <i>Salta triflora</i>       | 1 | 1 |
| 1977                        | <i>Tabebuia nodosa</i> + <i>Salta triflora</i>                                    | 2 | 2 |
| 1978                        | <i>Tabebuia nodosa</i> + <i>Salta triflora</i> + <i>Aspidosperma triternatum</i>  | 1 | 1 |
| 1979                        | <i>Tabebuia nodosa</i> + <i>Salta triflora</i> + <i>Gonopterodendron</i>          | 1 | 1 |
| 1980                        | <i>Tabebuia nodosa</i> + <i>Salta triflora</i> + <i>Pisonia zapallo</i>           | 1 | 1 |
| 1981                        | <i>Tabebuia nodosa</i> + <i>Salta triflora</i> + <i>Sarcomphalus mistol</i>       | 1 | 1 |
| 1982                        | <i>Tabebuia nodosa</i> + <i>Salta triflora</i> + <i>Schinopsis lorentzii</i>      | 1 | 1 |
| 1983                        | <i>Tabebuia nodosa</i> + <i>Salta triflora</i> + <i>Schinopsis</i>                | 2 | 2 |
| 1984                        | <i>Tabebuia nodosa</i> + <i>Salta triflora</i> + <i>Senegalia</i>                 | 1 | 1 |
| 1985                        | <i>Tabebuia nodosa</i> + <i>Sarcomphalus mistol</i>                               | 1 | 1 |
| 1986                        | <i>Tabebuia nodosa</i> + <i>Sarcomphalus mistol</i> + <i>Prosopis</i>             | 1 | 1 |
| 1987                        | <i>Tabebuia nodosa</i> + <i>Sarcomphalus mistol</i> + <i>Schinopsis</i>           | 1 | 1 |
| 1988                        | <i>Tabebuia nodosa</i> + <i>Schinopsis balansae</i> + <i>Prosopis</i>             | 1 | 1 |
| 1989                        | <i>Tabebuia nodosa</i> + <i>Schinopsis lorentzii</i>                              | 3 | 3 |
| 1990                        | <i>Tabebuia nodosa</i> + <i>Schinopsis lorentzii</i> + <i>Aspidosperma</i>        | 2 | 2 |
| 1991                        | <i>Tabebuia nodosa</i> + <i>Schinopsis lorentzii</i> + <i>Bougainvillea</i>       | 1 | 1 |
| 1992                        | <i>Tabebuia nodosa</i> + <i>Schinopsis lorentzii</i> + <i>Sarcomphalus</i>        | 2 | 2 |
| 1993                        | <i>Tabebuia nodosa</i> + <i>Vachellia caven</i>                                   | 1 | 1 |
| <b>Urticaceae + others</b>  |                                                                                   |   |   |
| 1994                        | <i>Cecropia pachystachya</i> + <i>Alchornea glandulosa</i> + <i>Ocotea</i>        | 1 | 1 |
| 1995                        | <i>Cecropia pachystachya</i> + <i>Trema micrantha</i> + <i>Chrysophyllum</i>      | 1 | 1 |
| <b>Zanthoxylum + others</b> |                                                                                   |   |   |

|                                |                                                                         |   |   |   |
|--------------------------------|-------------------------------------------------------------------------|---|---|---|
| 1996                           | <i>Zanthoxylum coco</i>                                                 | 1 | 1 | 2 |
| 1997                           | <i>Zanthoxylum coco</i> + <i>Juglans australis</i> + <i>Allophylus</i>  | 1 |   | 1 |
| <b>Zygophyllaceae + others</b> |                                                                         |   |   |   |
| 1998                           | <i>Bulnesia retama</i>                                                  | 4 |   | 4 |
| 1999                           | <i>Bulnesia retama</i> + <i>Prosopis chilensis</i>                      | 1 |   | 1 |
| 2000                           | <i>Bulnesia retama</i> + <i>Prosopis flexuosa</i>                       | 2 |   | 2 |
| 2001                           | <i>Bulnesia retama</i> + <i>Vachellia aroma</i>                         | 1 |   | 1 |
| 2002                           | <i>Celtis ehrenbergiana</i> + <i>Bulnesia retama</i> + <i>Geoffroea</i> | 1 |   | 1 |
| 2003                           | <i>Senegalia gilliesii</i> + <i>Bulnesia retama</i>                     | 1 |   | 1 |

---
